# Supplementary material for: Identification of drugs targeting multiple viral and human proteins using computational analysis for repurposing against COVID-19
Source: Research Square preprint supplement (doi:10.21203/rs.3.rs-101778/v1), 2020-11-13
Supplement: Supplementary file 1 [file a7d4411bbd118b325d6b3e8e.xlsx]

## Sheet: WikiPathways_2019_Human_table (
Term	P-value	Adjusted P-value	Odds Ratio	Genes
Type II interferon signaling (IFNG) WP619	2.31684e-09	1.09355e-06	16.6605	CXCL10;SPI1;OAS1;IFI6;EIF2AK2;CYBB;ISG15;IRF9;IFIT2
TYROBP Causal Network WP3945	1.76382e-08	4.16261e-06	11.2284	APBB1IP;TYROBP;IGSF6;BIN2;PLEK;CD37;SAMSN1;CXCL16;GAPT;C1QC
Chemokine signaling pathway WP3929	1.91606e-08	3.0146e-06	6.26462	CCR1;CCL11;WAS;ARRB2;CXCL16;FGR;CXCL10;HCK;GNG2;GNG5;CCL7;CCL4;RAC2;PTK2B;CCL19
The human immune response to tuberculosis WP4197	7.53567e-07	8.89209e-05	17.8678	IFITM1;OAS1;MX1;IFIT1;IFIT3;IRF9
Microglia Pathogen Phagocytosis Pathway WP3937	1.62379e-06	0.000153286	11.9863	HCK;FCER1G;TYROBP;RAC2;CYBB;TREM1;C1QC
Spinal Cord Injury WP2431	0.000342648	0.026955	4.6436	EGR1;CXCL10;PLXNA2;FOS;LILRB2;LILRB3;TNF;TNFSF13B
Aryl Hydrocarbon Receptor Pathway WP2873	0.000538355	0.0363005	7.44491	JUN;JUND;CDC37;CYP1A1;TNF
Non-genomic actions of 1,25 dihydroxyvitamin D3 WP4341	0.000594698	0.0350872	5.78815	RXRB;JUN;OAS2;ISG15;TNF;IFI44L
Photodynamic therapy-induced AP-1 survival signaling. WP3611	0.000793553	0.0416174	6.84932	JUN;BCL3;TNFSF10;FOS;TNF
Nuclear Receptors Meta-Pathway WP2882	0.000877678	0.0414264	2.79126	SRGN;EGR1;JUN;GPX2;JUND;SERPINA1;SERPINB9;TNF;CDC37;MAFG;ALOX5AP;CYP1A1;S100P
Regulation of toll-like receptor signaling pathway WP1449	0.0010143	0.0435226	3.94205	CXCL10;JUN;FBXW5;CCL4;LY96;FOS;TNF;TREM1
Vitamin D Receptor Pathway WP2877	0.00146094	0.0574635	3.38702	CEACAM1;CASP5;MX2;CYP1A1;LGALS9;MXD1;TRAK1;TREM1;S100A8
Complement and Coagulation Cascades WP558	0.00156105	0.0566782	5.90458	SERPINA1;CR1;C3AR1;F5;C1QC
Fibrin Complement Receptor 3 Signaling Pathway WP4136	0.00201161	0.0678199	7.40466	CXCL10;TYROBP;LY96;TNF
Apoptosis Modulation and Signaling WP1772	0.00217229	0.0683547	4.51603	JUN;BCL2A1;CASP4;MADD;TNFSF10;FOS
Human Thyroid Stimulating Hormone (TSH) signaling pathway WP2032	0.00277023	0.0817217	5.18888	EGR1;JUN;GNG2;FOS;RALGDS
Human Complement System WP2806	0.00299541	0.0831667	4.23669	CR1;SELL;C3AR1;FPR1;WAS;ARRB2
IL-2 Signaling Pathway WP49	0.00322032	0.084444	6.52316	JUN;PTK2B;FOS;IL2RG
Toll-like Receptor Signaling Pathway WP75	0.00403193	0.100162	3.98989	CXCL10;JUN;CCL4;LY96;FOS;TNF
IL-3 Signaling Pathway WP286	0.00562973	0.132862	5.59128	HCK;JUN;CSF2RB;FOS
Synaptic Vesicle Pathway WP2267	0.0064912	0.145897	5.37201	CACNA1A;CPLX2;SLC25A4;SYN1
Apoptosis-related network due to altered Notch3 in ovarian cancer WP2864	0.00743583	0.159532	5.16929	JUND;BCL3;PTK2B;TNF
Myometrial Relaxation and Contraction Pathways WP289	0.00809808	0.166187	3.07341	RGS18;JUN;GNG2;GNG5;ARRB2;FOS;ACTB
Pathogenic Escherichia coli infection WP2272	0.00846678	0.166513	4.98132	WAS;LY96;ACTB;TUBA4A
PDGFR-beta pathway WP3972	0.00850049	0.160489	7.0855	JUN;EIF2AK2;FOS
T-Cell antigen Receptor (TCR) Signaling Pathway WP69	0.0102789	0.186601	3.80518	JUN;WAS;PTK2B;LCP2;FOS
RIG-I-like Receptor Signaling WP3865	0.0114411	0.200007	4.56621	CXCL10;DDX58;ISG15;TNF
Oxidative Stress WP408	0.0121617	0.205011	6.22665	CYP1A1;CYBB;FOS
Signal transduction through IL1R WP4496	0.0121617	0.197942	6.22665	IL1RN;JUN;TNF
T-Cell antigen Receptor (TCR) pathway during Staphylococcus aureus infection WP3863	0.0127966	0.201333	4.41891	JUN;LCP2;FOS;TNF
Signaling of Hepatocyte Growth Factor Receptor WP313	0.0131971	0.200937	6.04351	JUN;PTK2B;FOS
Lung fibrosis WP3624	0.0135111	0.199289	4.34877	SERPINA1;CCL11;CCL4;TNF
Estrogen Receptor Pathway WP2881	0.0149003	0.21312	10.5374	JUN;CYP1A1
Serotonin and anxiety-related events WP3944	0.0149003	0.206852	10.5374	PLEK;FOS
Oncostatin M Signaling Pathway WP2374	0.0150151	0.20249	4.21496	EGR1;JUND;PTK2B;FOS
Melatonin metabolism and effects WP3298	0.0165974	0.21761	5.5535	PER1;CRY2;CYP1A1
Brain-Derived Neurotrophic Factor (BDNF) signaling pathway WP2380	0.0192405	0.245446	2.85388	EGR1;JUN;MARCKS;PTK2B;FOS;SYN1
IL-5 Signaling Pathway WP127	0.0204427	0.25392	5.13699	JUN;CSF2RB;FOS
Oxidative Damage WP3941	0.0204427	0.247409	5.13699	C3AR1;TNF;C1QC
Chromosomal and microsatellite instability in colorectal cancer WP4216	0.022066	0.260379	3.75305	JUN;RAC2;FOS;RALGDS
Fas Ligand (FasL) pathway and Stress induction of Heat Shock Proteins (HSP) regulation WP314	0.023255	0.267716	4.89237	JUN;TNF;ACTB
Serotonin and anxiety WP3947	0.0250046	0.281004	8.05802	PLEK;FOS
Estrogen metabolism WP697	0.0278631	0.305846	7.61035	CYP1A1;ARSE
MAPK Signaling Pathway WP382	0.0285158	0.305897	2.22742	JUN;JUND;TAOK3;RAC2;CACNA1A;FOS;ARRB2;TNF
Aryl Hydrocarbon Receptor WP2586	0.0294765	0.309175	4.46694	CDC37;CYP1A1;TNF
Selenium Metabolism and Selenoproteins WP28	0.0294765	0.302454	4.46694	JUN;GPX2;FOS
Apoptosis WP254	0.034597	0.347442	3.26158	JUN;CASP4;TNFSF10;TNF
Copper homeostasis WP3286	0.0402857	0.396143	3.95153	JUN;ATP7B;XAF1
Regulation of Apoptosis by Parathyroid Hormone-related Protein WP3872	0.0404978	0.390101	6.22665	BCL2A1;BCL2L14
Type II diabetes mellitus WP1584	0.0404978	0.382299	6.22665	CACNA1A;TNF
Allograft Rejection WP2328	0.0414136	0.383279	3.07834	HLA-DRB5;CCL19;TNF;C1QC
Estrogen signaling pathway WP712	0.0439363	0.398806	5.95593	JUN;FOS
Hippo-Yap signaling pathway WP4537	0.0439363	0.391282	5.95593	CXCL10;RASSF1
TGF-beta Receptor Signaling WP560	0.0442753	0.386999	3.80518	JUN;FOS;TNF
TNF alpha Signaling Pathway WP231	0.0458428	0.393415	2.97796	JUN;CDC37;MADD;TNF
Hematopoietic Stem Cell Differentiation WP2849	0.0463412	0.39059	3.73599	SPI1;RHOH;FOS
RANKL/RANK (Receptor activator of NFKB (ligand)) Signaling Pathway WP2018	0.0463412	0.383737	3.73599	JUN;SPI1;FOS
Photodynamic therapy-induced NFE2L2 (NRF2) survival signaling WP3612	0.0474789	0.38638	5.70776	JUN;FOS
IL-7 Signaling Pathway WP205	0.0511218	0.408975	5.47945	PTK2B;IL2RG
Physiological and Pathological Hypertrophy of the Heart WP1528	0.0511218	0.402158	5.47945	JUN;FOS
Metapathway biotransformation Phase I and II WP702	0.0523185	0.404825	2.24568	NDST1;GPX2;HS3ST3A1;CYP4F3;CYP1A1;CYP19A1
Preimplantation Embryo WP3527	0.0528186	0.402103	3.54275	EGR1;AQP9;MXD1
Ras Signaling WP4223	0.0534519	0.400465	2.23347	RASSF1;GNG2;RASA3;GNG5;RAC2;RALGDS
VEGFA-VEGFR2 Signaling Pathway WP3888	0.0586687	0.432682	2.03158	EGR1;JUN;ARHGEF15;PTK2B;ARRB2;PFN1;RND1
Sphingolipid pathway WP1422	0.0586943	0.426211	5.07357	CERS6;SPHK1
Oxidation by Cytochrome P450 WP43	0.0597068	0.426994	3.36852	CYP4F3;CYP1A1;CYP19A1
MAPK Cascade WP422	0.0666253	0.46936	4.72367	JUN;RASA3
Selective expression of chemokine receptors during T-cell polarization WP4494	0.0666253	0.462458	4.72367	CCR1;CCL4
Calcium Regulation in the Cardiac Cell WP536	0.0677164	0.46322	2.29843	RGS18;GNG2;GNG5;CACNA1A;ARRB2
Regulation of Actin Cytoskeleton WP51	0.0692588	0.467002	2.28311	RAC2;WAS;PFN1;ARHGEF7;ACTB
Matrix Metalloproteinases WP129	0.0707168	0.470117	4.56621	MMP8;TNF
Circadian rhythm related genes WP3594	0.0749977	0.491651	2.04457	EGR1;PER1;JUN;JUND;KCNH7;CRY2
Monoamine Transport WP727	0.0791354	0.51167	4.28082	TNF;SYN1
Ovarian Infertility Genes WP34	0.0791354	0.504756	4.28082	EGR1;CYP19A1
Sudden Infant Death Syndrome (SIDS) Susceptibility Pathways WP706	0.0822898	0.517877	2.1675	EGR1;IL1RN;JUN;TNF;SLC25A4
GPCRs, Class A Rhodopsin-like WP455	0.0836545	0.519539	1.86557	CCR1;P2RY13;GPR65;C3AR1;FPR1;FFAR2;RGL4
SCFA and skeletal muscle substrate metabolism WP4030	0.084474	0.517815	11.4155	FFAR2
let-7 inhibition of ES cell reprogramming WP3299	0.084474	0.511176	11.4155	EGR1
Insulin Signaling WP481	0.0857376	0.512255	2.14041	EGR1;JUN;RRAD;RAC2;FOS
EGF/EGFR Signaling Pathway WP437	0.0892604	0.526636	2.11399	JUN;JUND;PTK2B;FOS;RALGDS
Photodynamic therapy-induced NF-kB survival signaling WP3617	0.0923061	0.537882	3.91389	BCL2A1;TNF
Peptide GPCRs WP24	0.0939772	0.540942	2.77675	CCR1;C3AR1;FPR1
DDX1 as a regulatory component of the Drosha microprocessor WP2942	0.0978447	0.556418	9.78474	NBN
EV release from cardiac cells and their functional effects WP3297	0.0978447	0.549794	9.78474	TNF
Hfe effect on hepcidin production WP3924	0.0978447	0.543326	9.78474	HAMP
miRNAs involvement in the immune response in sepsis WP4329	0.101414	0.556597	3.70233	CCL4;TNF
G13 Signaling Pathway WP524	0.110757	0.600889	3.51247	WAS;PFN1
PDGF Pathway WP2526	0.110757	0.594061	3.51247	JUN;FOS
ApoE and miR-146 in inflammation and atherosclerosis WP3926	0.111021	0.588784	8.56164	SPI1
ATM Signaling Pathway WP2516	0.115511	0.605789	3.42466	JUN;NBN
Ebola Virus Pathway on Host WP4217	0.120455	0.624776	2.12382	HLA-DRB5;DDX58;EIF2AK2;ACTB
Benzo(a)pyrene metabolism WP696	0.124005	0.6362	7.61035	CYP1A1
Macrophage markers WP4146	0.124005	0.629359	7.61035	RAC2
Metabolism of Spingolipids in ER and Golgi apparatus WP4142	0.124005	0.622664	7.61035	SPHK1
Role Altered Glycolysation of MUC1 in Tumour Microenvironment WP4480	0.124005	0.616109	7.61035	TNF
Viral Acute Myocarditis WP4298	0.124656	0.612892	2.44618	RAC2;TNF;ACTB
TNF related weak inducer of apoptosis (TWEAK) Signaling Pathway WP2036	0.125168	0.609065	3.26158	JUN;TNF
Vitamin A and Carotenoid Metabolism WP716	0.130067	0.626446	3.18573	RXRB;RBP4
Selenium Micronutrient Network WP15	0.13118	0.625424	2.3893	GPX2;ALOX5AP;TNF
Ethanol metabolism resulting in production of ROS by CYP2E1 WP4269	0.1368	0.645697	6.84932	MAFG
Leptin and adiponectin WP3934	0.1368	0.639304	6.84932	PRKAB1
Mammary gland development pathway - Involution (Stage 4 of 4) WP2815	0.1368	0.633037	6.84932	CHI3L1
Type III interferon signaling WP2113	0.1368	0.626891	6.84932	IRF9
Vitamin D Metabolism WP1531	0.1368	0.620863	6.84932	RXRB
Tryptophan metabolism WP465	0.145018	0.65189	2.97796	CYP1A1;CYP19A1
Energy Metabolism WP1541	0.150078	0.668274	2.9146	UCP2;PRKAB1
Thymic Stromal LymphoPoietin (TSLP) Signaling Pathway WP2203	0.150078	0.662028	2.9146	HCK;CCL11
Corticotropin-releasing hormone signaling pathway WP2355	0.154904	0.676988	2.20946	JUND;ARRB2;FOS
Exercise-induced Circadian Regulation WP410	0.155174	0.671946	2.85388	PER1;CRY2
Focal Adhesion-PI3K-Akt-mTOR-signaling pathway WP3932	0.156337	0.670826	1.58235	CSF3R;GNG2;GNG5;PIK3IP1;CDC37;IL2RG;RAB8A
Hepatitis C and Hepatocellular Carcinoma WP3646	0.160302	0.681645	2.79564	JUN;PODXL
Iron metabolism in placenta WP2007	0.161835	0.682018	5.70776	HAMP
Nanoparticle triggered regulated necrosis WP2513	0.161835	0.675982	5.70776	TNF
RalA downstream regulated genes WP2290	0.161835	0.670053	5.70776	RAC2
Focal Adhesion WP306	0.1645	0.675164	1.72963	FGR;HCK;JUN;RAC2;ACTB
Vitamin B12 Metabolism WP1533	0.165461	0.673255	2.73973	TCN1;TNF
NRF2 pathway WP2884	0.165515	0.667719	1.87652	EGR1;GPX2;SERPINA1;MAFG
B Cell Receptor Signaling Pathway WP23	0.16902	0.67608	2.11834	JUN;RAC2;DAPP1
Development of pulmonary dendritic cells and macrophage subsets WP3892	0.174079	0.690466	5.2687	SPI1
Genes targeted by miRNAs in adipocytes WP1992	0.174079	0.684712	5.2687	KCNJ2
Homologous recombination WP186	0.174079	0.679053	5.2687	NBN
MFAP5-mediated ovarian cancer cell motility and invasiveness WP3301	0.174079	0.673487	5.2687	JUN
Vitamin B12 Disorders WP4271	0.174079	0.668012	5.2687	TCN1
IL-4 Signaling Pathway WP395	0.186365	0.70939	2.53678	FOS;IL2RG
DNA IR-Double Strand Breaks (DSBs) and cellular response via ATM WP3959	0.191649	0.723667	2.49066	RASSF1;NBN
Classical pathway of steroidogenesis, including diseases WP4523	0.198036	0.74185	4.56621	CYP19A1
Fatty Acid Omega Oxidation WP206	0.198036	0.736008	4.56621	CYP1A1
Mammary gland development pathway - Embryonic development (Stage 1 of 4) WP2813	0.198036	0.730258	4.56621	TNF
Deregulation of Rab and Rab Effector Genes in Bladder Cancer WP2291	0.209754	0.76747	4.28082	MADD
Cells and Molecules involved in local acute inflammatory response WP4493	0.2213	0.803491	4.02901	TNF
IL-9 Signaling Pathway WP22	0.2213	0.797357	4.02901	IL2RG
Simplified Depiction of MYD88 Distinct Input-Output Pathway WP3877	0.232679	0.832004	3.80518	JUN
Simplified Interaction Map Between LOXL4 and Oxidative Stress Pathway WP3670	0.232679	0.825748	3.80518	CDC37
Genotoxicity pathway WP4286	0.23449	0.825964	2.17439	PRKAB1;HIST1H2BC
Overview of nanoparticle effects WP3287	0.243892	0.852719	3.6049	TNF
Serotonin Receptor 4/6/7 and NR3C Signaling WP734	0.243892	0.846449	3.6049	EGR1
TP53 Network WP1742	0.243892	0.84027	3.6049	TNFSF10
Association Between Physico-Chemical Features and Toxicity Associated Pathways WP3680	0.250715	0.85752	2.07555	JUN;PFN1
Folate Metabolism WP176	0.250715	0.85135	2.07555	GPX2;TNF
Non-small cell lung cancer WP4255	0.250715	0.845269	2.07555	RXRB;RASSF1
BMP Signaling Pathway in Eyelid Development WP3927	0.254942	0.853422	3.42466	JUN
Hereditary leiomyomatosis and renal cell carcinoma pathway WP4206	0.254942	0.847412	3.42466	PRKAB1
Hypertrophy Model WP516	0.254942	0.841486	3.42466	JUND
PPAR signaling pathway WP3942	0.256132	0.839545	2.04457	RXRB;OLR1
Nicotine Activity on Dopaminergic Neurons WP1602	0.26583	0.865324	3.26158	GNG2
Tamoxifen metabolism WP691	0.26583	0.859397	3.26158	CYP1A1
Sterol Regulatory Element-Binding Proteins (SREBP) signalling WP1982	0.266971	0.857214	1.98531	RBP4;PRKAB1
Parkin-Ubiquitin Proteasomal System pathway WP2359	0.272391	0.868706	1.95695	UBE2L6;TUBA4A
Complement Activation WP545	0.276561	0.876084	3.11333	C1QC
Transcription factor regulation in adipogenesis WP3599	0.276561	0.870244	3.11333	TNF
Vitamin D in inflammatory diseases WP4482	0.276561	0.864481	3.11333	TNF
miRNA Regulation of DNA Damage Response WP1530	0.277809	0.86267	1.92938	MCM7;NBN
Primary Focal Segmental Glomerulosclerosis FSGS WP2572	0.283224	0.873738	1.90259	CR1;PODXL
Blood Clotting Cascade WP272	0.287134	0.880048	2.97796	F5
EBV LMP1 signaling WP262	0.287134	0.87437	2.97796	TNF
Glutathione metabolism WP100	0.287134	0.868766	2.97796	GPX2
TGF-beta Signaling Pathway WP366	0.303397	0.912122	1.55666	JUN;JUND;FOS
Prolactin Signaling Pathway WP2037	0.30484	0.910661	1.80245	JUN;FOS
Differentiation of white and brown adipocyte WP2895	0.307822	0.913787	2.73973	PLAC8
Signal Transduction of S1P Receptor WP26	0.307822	0.908075	2.73973	SPHK1
Cytokines and Inflammatory Response WP530	0.317941	0.932099	2.63435	TNF
Ectoderm Differentiation WP2858	0.327352	0.953768	1.48898	PODXL;PLXNA2;HESX1
Eicosanoid Synthesis WP167	0.327912	0.949536	2.53678	ALOX5AP
Follicle Stimulating Hormone (FSH) signaling pathway WP2035	0.327912	0.943746	2.53678	CYP19A1
TLR4 Signaling and Tolerance WP3851	0.337737	0.966134	2.44618	TNF
Alzheimers Disease WP2059	0.34234	0.9734	1.65044	PSENEN;TNF
Cannabinoid receptor signaling WP3869	0.34742	0.981929	2.36183	CYP1A1
Gastric Cancer Network 1 WP2361	0.34742	0.976085	2.36183	S100P
Lipid Metabolism Pathway WP3965	0.34742	0.970309	2.36183	PRKAB1
Pathways in clear cell renal cell carcinoma WP4018	0.352944	0.979939	1.6116	KCNJ2;BAP1
Inflammatory Response Pathway WP453	0.356961	0.985297	2.28311	IL2RG
Oligodendrocyte Specification and differentiation(including remyelination), leading to Myelin Components for CNS WP4304	0.356961	0.979569	2.28311	TNF
Hair Follicle Development: Cytodifferentiation (Part 3 of 3) WP2840	0.363489	0.991715	1.57456	JUN;FOS
Factors and pathways affecting insulin-like growth factor (IGF1)-Akt signaling WP3850	0.366364	0.993815	2.20946	PRKAB1
Gastric Cancer Network 2 WP2363	0.366364	0.988136	2.20946	PLAC8
Cytoplasmic Ribosomal Proteins WP477	0.373968	1	1.53917	RPL3;RPSA
Pancreatic adenocarcinoma pathway WP4263	0.373968	0.997248	1.53917	RAC2;RALGDS
Development and heterogeneity of the ILC family WP3893	0.375629	0.996051	2.14041	TNF
GPCRs, Other WP117	0.384377	1	1.50534	P2RY13;GPR84
Prion disease pathway WP3995	0.38476	1	2.07555	SPI1
Resistin as a regulator of inflammation WP4481	0.38476	1	2.07555	TNF
Breast cancer pathway WP4262	0.39096	1	1.33428	JUN;NBN;FOS
Nonalcoholic fatty liver disease WP4396	0.394897	1	1.32567	JUN;TNF;PRKAB1
Target Of Rapamycin (TOR) Signaling WP1471	0.41136	1	1.90259	PRKAB1
Photodynamic therapy-induced HIF-1 survival signaling WP3614	0.41997	1	1.85117	BCL2A1
Amyotrophic lateral sclerosis (ALS) WP2447	0.428454	1	1.80245	TNF
Nuclear Receptors WP170	0.428454	1	1.80245	RXRB
Parkinsons Disease Pathway WP2371	0.428454	1	1.80245	UBE2L6
Sleep regulation WP3591	0.428454	1	1.80245	FOS
Integrin-mediated Cell Adhesion WP185	0.43521	1	1.3563	RAC2;ARHGEF7
Bladder Cancer WP2828	0.445053	1	1.71233	RASSF1
Ferroptosis WP4313	0.445053	1	1.71233	CYBB
Electron Transport Chain (OXPHOS system in mitochondria) WP111	0.445108	1	1.32996	UCP2;SLC25A4
Nucleotide-binding Oligomerization Domain (NOD) pathway WP1433	0.453171	1	1.67056	CASP5
Common Pathways Underlying Drug Addiction WP2636	0.461172	1	1.63079	ACTB
DNA Replication WP466	0.461172	1	1.63079	MCM7
Metabolic reprogramming in colon cancer WP4290	0.461172	1	1.63079	PYCR2
IL-6 signaling pathway WP364	0.469055	1	1.59286	HCK
Thermogenesis WP4321	0.469423	1	1.26839	PRKAB1;ACTB
Hedgehog Signaling Pathway WP4249	0.476823	1	1.55666	ARRB2
DNA Damage Response (only ATM dependent) WP710	0.47897	1	1.24533	JUN;RAC2
ATM Signaling Network in Development and Disease WP3878	0.484479	1	1.52207	NBN
Mechanoregulation and pathology of YAP/TAZ via Hippo and non-Hippo mechanisms WP4534	0.499456	1	1.4573	ACTB
NO/cGMP/PKG mediated Neuroprotection WP4008	0.499456	1	1.4573	TNF
Rett syndrome causing genes WP4312	0.506781	1	1.42694	XAB2
ESC Pluripotency Pathways WP3931	0.506972	1	1.18092	JUN;FOS
Structural Pathway of Interleukin 1 (IL-1) WP2637	0.513999	1	1.39782	FOS
Synaptic signaling pathways associated with autism spectrum disorder WP4539	0.521112	1	1.36986	PRKAB1
One carbon metabolism and related pathways WP3940	0.535029	1	1.31718	GPX2
Translation Factors WP107	0.535029	1	1.31718	EIF2AK2
Wnt Signaling Pathway WP363	0.535029	1	1.31718	ARRB2
Interferon type I signaling pathways WP585	0.548542	1	1.26839	IRF9
Cardiac Hypertrophic Response WP2795	0.555151	1	1.24533	TNF
IL-1 signaling pathway WP195	0.555151	1	1.24533	JUN
PI3K-Akt Signaling Pathway WP4172	0.55587	1	1.00725	CSF3R;GNG2;GNG5;CDC37;IL2RG
Kit receptor signaling pathway WP304	0.580637	1	1.1609	FOS
MET in type 1 papillary renal cell carcinoma WP4205	0.580637	1	1.1609	JUN
Notch Signaling Pathway WP61	0.592829	1	1.12284	PSENEN
Endometrial cancer WP4155	0.604668	1	1.08719	FOS
G1 to S cell cycle control WP45	0.610458	1	1.07021	MCM7
AGE/RAGE pathway WP2324	0.621786	1	1.03778	JUN
DNA Damage Response WP707	0.632785	1	1.00725	NBN
AMP-activated Protein Kinase (AMPK) Signaling WP1403	0.638165	1	0.992654	PRKAB1
Integrated Breast Cancer Pathway WP1984	0.649805	1	0.907194	JUN;CYP19A1
Arrhythmogenic Right Ventricular Cardiomyopathy WP2118	0.663907	1	0.925583	ACTB
Leptin signaling pathway WP2034	0.673686	1	0.901226	IL1RN
DNA IR-damage and cellular response via ATR WP4016	0.6924	1	0.856164	NBN
MicroRNAs in cardiomyocyte hypertrophy WP1544	0.710044	1	0.815395	TNF
ncRNAs involved in Wnt signaling in hepatocellular carcinoma WP4336	0.718485	1	0.796432	JUN
Retinoblastoma Gene in Cancer WP2446	0.722612	1	0.787278	MCM7
Androgen receptor signaling pathway WP138	0.734638	1	0.761035	JUN
ErbB Signaling Pathway WP673	0.738529	1	0.752672	JUN
G Protein Signaling Pathways WP35	0.746143	1	0.736485	GNG5
LncRNA involvement in canonical Wnt signaling and colorectal cancer WP4258	0.749867	1	0.728651	JUN
Pathways Regulating Hippo Signaling WP4540	0.764225	1	0.69891	PRKAB1
Wnt Signaling Pathway and Pluripotency WP399	0.777761	1	0.671501	JUN
Senescence and Autophagy in Cancer WP615	0.787403	1	0.652316	JUN
Wnt Signaling WP428	0.816629	1	0.595593	JUN
Ciliary landscape WP4352	0.826336	1	0.634196	MCM7;RAB8A
Cell Cycle WP179	0.829704	1	0.570776	MCM7
Hippo-Merlin Signaling Dysregulation WP4541	0.829704	1	0.570776	CXCL10
mRNA Processing WP411	0.844173	1	0.543596	SREK1
Adipogenesis WP236	0.853132	1	0.52687	TNF
Angiopoietin Like Protein 8 Regulatory Pathway WP3915	0.857417	1	0.518888	PRKAB1

## Sheet: GO Molecular Functions
Term	P-value	Adjusted P-value	Odds Ratio	Genes
chemokine activity (GO:0008009)	4.3256e-06	0.00497877	10.4229	CXCL10;CCL11;CCL8;CCL7;CCL4;CCL19;CXCL16
chemokine receptor binding (GO:0042379)	6.68723e-06	0.0038485	9.78474	CXCL10;CCL11;CCL8;CCL7;CCL4;CCL19;CXCL16
kinase binding (GO:0019900)	0.00015115	0.0579914	2.78561	FBXW5;WAS;RHOH;ACTB;SYN1;TUBA4A;RND1;FGR;PER1;CEACAM1;PIK3IP1;CDC37;RAC2;STAP1;CARD16;ARHGEF7;BCL2L14
double-stranded RNA binding (GO:0003725)	0.000216503	0.0622988	6.96541	OAS1;DDX58;OAS2;OAS3;EIF2AK2;OASL
CCR chemokine receptor binding (GO:0048020)	0.000216809	0.0499094	9.01226	CCL11;CCL8;CCL7;CCL4;CCL19
adenylyltransferase activity (GO:0070566)	0.000218967	0.0420051	13.0463	OAS1;OAS2;OAS3;OASL
RAGE receptor binding (GO:0050786)	0.000242418	0.0398604	22.8311	S100A13;S100A12;S100A8
complement receptor activity (GO:0004875)	0.00046596	0.0670399	18.68	CR1;C3AR1;FPR1
cytokine activity (GO:0005125)	0.000466865	0.0597068	3.97702	CXCL10;IL1RN;CCL11;CCL8;CCL7;CCL4;CCL19;TNF;CXCL16
phosphotyrosine residue binding (GO:0001784)	0.00079271	0.0912409	9.44733	FGR;HCK;STAP1;SAMSN1
protein phosphorylated amino acid binding (GO:0045309)	0.00146176	0.152954	8.05802	FGR;HCK;STAP1;SAMSN1
cysteine-type endopeptidase activity involved in apoptotic process (GO:0097153)	0.00149815	0.143698	12.8425	CASP5;CASP4;CLC
protease binding (GO:0002020)	0.00174672	0.154652	4.06315	CSTA;SERPINA1;SELL;CARD17;SERPINB9;CARD16;TNF
chitinase activity (GO:0004568)	0.00425016	0.349424	19.5695	CHI3L2;CHI3L1
phosphatidylinositol-3,4-bisphosphate binding (GO:0043325)	0.00496776	0.381193	8.56164	PLEK;ARAP3;DAPP1
purine ribonucleoside triphosphate binding (GO:0035639)	0.00570171	0.410167	2.24851	GCH1;SPHK1;MX2;RHOH;SYN1;TUBA4A;RND1;ATP7B;OAS1;OAS2;OAS3;RAC2;RAB8A
GTP binding (GO:0005525)	0.00591183	0.400266	3.26158	GCH1;MX2;RAC2;RHOH;TUBA4A;RAB8A;RND1
protein kinase binding (GO:0019901)	0.00639292	0.408792	2.07555	FBXW5;GCH1;PLEK;WAS;RHOH;ACTB;SYN1;TUBA4A;RND1;FGR;CEACAM1;RAC2;STAP1;ARHGEF7;BCL2L14
cysteine-type endopeptidase inhibitor activity (GO:0004869)	0.0064912	0.39323	5.37201	CSTA;TNFSF14;SERPINB9;CARD16
purine ribonucleoside binding (GO:0032550)	0.00894449	0.514755	3.01542	GCH1;MX2;RAC2;RHOH;TUBA4A;RAB8A;RND1
phosphatidylinositol bisphosphate binding (GO:1902936)	0.00895026	0.490559	3.93639	PLEK;ARAP3;DAPP1;PFN1;KCNJ2
caspase binding (GO:0089720)	0.0107104	0.560349	12.4533	CARD17;CARD16
guanyl ribonucleotide binding (GO:0032561)	0.0126081	0.630952	2.82031	GCH1;MX2;RAC2;RHOH;TUBA4A;RAB8A;RND1
transcriptional repressor activity, RNA polymerase II activating transcription factor binding (GO:0098811)	0.0127296	0.610489	11.4155	JUN;FOS
GTPase activity (GO:0003924)	0.0166151	0.764957	2.46822	GCH1;GNG5;MX2;MX1;RAC2;RHOH;RAB8A;RND1
CARD domain binding (GO:0050700)	0.0172179	0.762223	9.78474	CASP4;CARD16
MHC class I protein binding (GO:0042288)	0.0172179	0.733993	9.78474	PILRA;LILRB2
cysteine-type endopeptidase activity involved in execution phase of apoptosis (GO:0097200)	0.0172179	0.707779	9.78474	CASP5;CASP4
heparan sulfate sulfotransferase activity (GO:0034483)	0.0172179	0.683372	9.78474	NDST1;HS3ST3A1
copper ion binding (GO:0005507)	0.0218239	0.837312	5.01169	ATP7B;S100A13;S100A12
poly(U) RNA binding (GO:0008266)	0.0222746	0.827033	8.56164	IFIT5;PATL1
non-membrane spanning protein tyrosine kinase activity (GO:0004715)	0.0247358	0.889717	4.77859	FGR;HCK;PTK2B
chemokine binding (GO:0019956)	0.0250046	0.872129	8.05802	CCR1;PLP2
cysteine-type endopeptidase activity (GO:0004197)	0.0308454	1	3.38238	CASP5;CASP4;ATG4B;CLC
R-SMAD binding (GO:0070412)	0.0308458	1	7.20981	JUN;FOS
FAD binding (GO:0071949)	0.0308458	0.98621	7.20981	CRY2;MICAL3
flavin adenine dinucleotide binding (GO:0050660)	0.0328841	1	4.28082	CRY2;MICAL3;CYBB
zinc ion binding (GO:0008270)	0.0339132	1	2.04119	EGR1;RASSF1;GCH1;DDX58;TNFSF10;S100A13;S100A12;MMP8;S100A8
poly-pyrimidine tract binding (GO:0008187)	0.0339486	1	6.84932	IFIT5;PATL1
protein phosphatase 2A binding (GO:0051721)	0.0339486	0.976871	6.84932	SPHK1;STRN4
anion:anion antiporter activity (GO:0015301)	0.0371673	1	6.52316	SLC26A8;SLC25A4
scavenger receptor activity (GO:0005044)	0.0371673	1	6.52316	DMBT1;CXCL16
RNA polymerase II regulatory region sequence-specific DNA binding (GO:0000977)	0.0384947	1	1.78678	RXRB;EGR1;PER1;JUN;SPI1;JUND;TFEC;HESX1;FOS;MXD1;ACTB;IER2
RNA polymerase II core promoter proximal region sequence-specific DNA binding (GO:0000978)	0.039127	1	2.09139	PER1;JUN;JUND;TFEC;HESX1;FOS;MXD1;ACTB
RNA polymerase II distal enhancer sequence-specific DNA binding (GO:0000980)	0.0402857	1	3.95153	JUN;SPI1;ACTB
protein phosphatase binding (GO:0019903)	0.0458428	1	2.97796	CEACAM1;SPHK1;LILRB2;STRN4
cysteine-type endopeptidase inhibitor activity involved in apoptotic process (GO:0043027)	0.0474789	1	5.70776	TNFSF14;SERPINB9
transcription regulatory region DNA binding (GO:0044212)	0.0487716	1	1.83137	EGR1;PER1;JUN;SPI1;JUND;BASP1;CRY2;FOS;TNF;IRF9
GTPase regulator activity (GO:0030695)	0.0494833	1	1.99253	RGS18;JUN;RASA3;WAS;TBCD;RHOH;ARAP3;RALGDS
core promoter proximal region sequence-specific DNA binding (GO:0000987)	0.0521034	1	1.97103	PER1;JUN;JUND;TFEC;HESX1;FOS;MXD1;ACTB
tumor necrosis factor receptor superfamily binding (GO:0032813)	0.0548615	1	5.2687	MADD;TNF
kinesin binding (GO:0019894)	0.0626167	1	4.89237	PLEKHM2;ACTB
channel activity (GO:0015267)	0.0626167	1	4.89237	BCL2A1;TIMM23
protein tyrosine kinase activity (GO:0004713)	0.0646899	1	2.3297	FGR;HCK;CDC37;PTK2B;CSF2RB
enhancer sequence-specific DNA binding (GO:0001158)	0.0669935	1	3.21062	JUN;SPI1;ACTB
transition metal ion binding (GO:0046914)	0.0689657	1	1.71662	EGR1;RASSF1;ATP7B;GCH1;DDX58;TNFSF10;S100A13;S100A12;MMP8;S100A8
cysteine-type peptidase activity (GO:0008234)	0.0695086	1	3.16122	CASP5;CASP4;ATG4B
MHC protein binding (GO:0042287)	0.0707168	1	4.56621	PILRA;LILRB2
hydrolase activity, hydrolyzing O-glycosyl compounds (GO:0004553)	0.0791354	1	4.28082	CHI3L2;CHI3L1
phosphatidylinositol-3,4,5-trisphosphate binding (GO:0005547)	0.0791354	1	4.28082	DAPP1;ARAP3
endopeptidase inhibitor activity (GO:0004866)	0.0797087	1	2.46822	CSTA;SERPINA1;SERPINB9;CARD16
olfactory receptor binding (GO:0031849)	0.084474	1	11.4155	RTP4
purine nucleobase transmembrane transporter activity (GO:0005345)	0.084474	1	11.4155	SLC25A4
arylesterase activity (GO:0004064)	0.084474	1	11.4155	CA1
MHC class I receptor activity (GO:0032393)	0.084474	1	11.4155	LILRB2
sphingosine N-acyltransferase activity (GO:0050291)	0.084474	1	11.4155	CERS6
interleukin-1 binding (GO:0019966)	0.084474	1	11.4155	IL1RN
phosphatidic acid transporter activity (GO:1990050)	0.084474	1	11.4155	PRELID1
1-phosphatidylinositol 4-kinase activity (GO:0004430)	0.084474	1	11.4155	PI4K2B
mechanically-gated ion channel activity (GO:0008381)	0.084474	1	11.4155	PIEZO1
inositol trisphosphate kinase activity (GO:0051766)	0.084474	1	11.4155	ITPKB
phospholipase activator activity (GO:0016004)	0.084474	1	11.4155	CCL8
cytokine receptor activity (GO:0004896)	0.0911024	1	2.81479	CCR1;CSF2RB;IL2RG
steroid hydroxylase activity (GO:0008395)	0.0923061	1	3.91389	CYP1A1;CYP19A1
[heparan sulfate]-glucosamine 3-sulfotransferase 1 activity (GO:0008467)	0.0978447	1	9.78474	HS3ST3A1
superoxide-generating NADPH oxidase activity (GO:0016175)	0.0978447	1	9.78474	CYBB
poly(G) binding (GO:0034046)	0.0978447	1	9.78474	PATL1
lipase activator activity (GO:0060229)	0.0978447	1	9.78474	CCL8
phospholipase binding (GO:0043274)	0.0978447	1	9.78474	WAS
cAMP-dependent protein kinase regulator activity (GO:0008603)	0.0978447	1	9.78474	CXCL10
cAMP response element binding (GO:0035497)	0.0978447	1	9.78474	JUN
NMDA glutamate receptor activity (GO:0004972)	0.0978447	1	9.78474	PTK2B
GTPase binding (GO:0051020)	0.099837	1	2.70368	WAS;ARAP3;LCP1
RNA polymerase II transcription factor binding (GO:0001085)	0.101377	1	2.26424	TCERG1;JUN;SPI1;FOS
G-protein coupled nucleotide receptor activity (GO:0001608)	0.111021	1	8.56164	P2RY13
C-C chemokine binding (GO:0019957)	0.111021	1	8.56164	CCR1
bioactive lipid receptor activity (GO:0045125)	0.111021	1	8.56164	SPHK1
G-protein coupled purinergic nucleotide receptor activity (GO:0045028)	0.111021	1	8.56164	P2RY13
oxidoreductase activity, acting on paired donors, with incorporation or reduction of molecular oxygen, NAD(P)H as one donor, and incorporation of one atom of oxygen (GO:0016709)	0.120315	1	3.34113	CYP4F3;MICAL3
ATP transmembrane transporter activity (GO:0005347)	0.124005	1	7.61035	SLC25A4
GABA receptor binding (GO:0050811)	0.124005	1	7.61035	TRAK1
armadillo repeat domain binding (GO:0070016)	0.124005	1	7.61035	STRN4
Toll-like receptor binding (GO:0035325)	0.124005	1	7.61035	S100A8
peptidase activity, acting on L-amino acid peptides (GO:0070011)	0.134901	1	1.85117	TPSB2;CASP5;ATG4B;TPP1;KLK10
filamin binding (GO:0031005)	0.1368	1	6.84932	CEACAM1
protein serine/threonine phosphatase inhibitor activity (GO:0004865)	0.1368	1	6.84932	PPP1R14B
death receptor binding (GO:0005123)	0.1368	1	6.84932	MADD
Tat protein binding (GO:0030957)	0.1368	1	6.84932	ACTB
ADP transmembrane transporter activity (GO:0015217)	0.1368	1	6.84932	SLC25A4
hydrolase activity, acting on carbon-nitrogen (but not peptide) bonds, in linear amidines (GO:0016813)	0.1368	1	6.84932	PADI2
G-protein activated inward rectifier potassium channel activity (GO:0015467)	0.1368	1	6.84932	KCNJ2
single-stranded RNA binding (GO:0003727)	0.139994	1	3.04414	DDX58;IFIT5
myosin binding (GO:0017022)	0.145018	1	2.97796	TRAK1;RAB8A
semaphorin receptor activity (GO:0017154)	0.149409	1	6.22665	PLXNA2
oxalate transmembrane transporter activity (GO:0019531)	0.149409	1	6.22665	SLC26A8
protein phosphatase 1 binding (GO:0008157)	0.149409	1	6.22665	LILRB2
tumor necrosis factor receptor binding (GO:0005164)	0.149409	1	6.22665	TNF
adenyl nucleotide binding (GO:0030554)	0.149409	1	6.22665	PFN1
immunoglobulin binding (GO:0019865)	0.149409	1	6.22665	FCER1G
adenyl-nucleotide exchange factor activity (GO:0000774)	0.149409	1	6.22665	PFN1
intermediate filament binding (GO:0019215)	0.149409	1	6.22665	NES
protein channel activity (GO:0015266)	0.149409	1	6.22665	TIMM23
galanin receptor activity (GO:0004966)	0.149409	1	6.22665	GPR84
nitric-oxide synthase binding (GO:0050998)	0.149409	1	6.22665	ACTB
RNA polymerase II activating transcription factor binding (GO:0001102)	0.150078	1	2.9146	JUN;FOS
arylsulfatase activity (GO:0004065)	0.161835	1	5.70776	ARSE
voltage-gated potassium channel activity involved in cardiac muscle cell action potential repolarization (GO:0086008)	0.161835	1	5.70776	KCNJ2
transcription corepressor binding (GO:0001222)	0.161835	1	5.70776	PER1
carbonate dehydratase activity (GO:0004089)	0.161835	1	5.70776	CA1
oxidoreductase activity, acting on NAD(P)H, oxygen as acceptor (GO:0050664)	0.161835	1	5.70776	CYBB
sulfate transmembrane transporter activity (GO:0015116)	0.161835	1	5.70776	SLC26A8
high voltage-gated calcium channel activity (GO:0008331)	0.161835	1	5.70776	CACNA1A
transcriptional activator activity, RNA polymerase II transcription factor binding (GO:0001190)	0.165461	1	2.73973	JUN;FOS
actin binding (GO:0003779)	0.168542	1	1.61795	SMTN;CEACAM1;MICAL3;WAS;LCP1;PFN1
nucleoside-triphosphatase activity (GO:0017111)	0.169412	1	1.45386	GCH1;GNG5;MX2;MX1;RAC2;RHOH;RAB8A;ATP5J2;RND1
SH3/SH2 adaptor activity (GO:0005070)	0.170649	1	2.68601	HSH2D;STAP1
ATP binding (GO:0005524)	0.17065	1	1.6116	ATP7B;OAS1;OAS2;SPHK1;OAS3;SYN1
GTPase inhibitor activity (GO:0005095)	0.174079	1	5.2687	RHOH
low-density lipoprotein receptor activity (GO:0005041)	0.174079	1	5.2687	CXCL16
double-stranded DNA binding (GO:0003690)	0.176214	1	2.07555	ZBP1;EGR1;IFIT5
serine-type endopeptidase inhibitor activity (GO:0004867)	0.196953	1	2.44618	SERPINA1;SERPINB9
G-protein coupled chemoattractant receptor activity (GO:0001637)	0.198036	1	4.56621	CCR1
intracellular ligand-gated ion channel activity (GO:0005217)	0.198036	1	4.56621	RASA3
syntaxin-1 binding (GO:0017075)	0.198036	1	4.56621	CPLX2
myosin V binding (GO:0031489)	0.198036	1	4.56621	RAB8A
interleukin-1 receptor binding (GO:0005149)	0.198036	1	4.56621	IL1RN
lipoprotein particle receptor activity (GO:0030228)	0.198036	1	4.56621	CXCL16
purinergic nucleotide receptor activity (GO:0001614)	0.198036	1	4.56621	P2RY13
protein kinase regulator activity (GO:0019887)	0.205775	1	1.92037	CXCL10;TAOK3;MADD
protein transmembrane transporter activity (GO:0008320)	0.209754	1	4.28082	TIMM23
sulfuric ester hydrolase activity (GO:0008484)	0.209754	1	4.28082	ARSE
bile acid transmembrane transporter activity (GO:0015125)	0.209754	1	4.28082	CEACAM1
ionotropic glutamate receptor activity (GO:0004970)	0.209754	1	4.28082	PTK2B
Rho guanyl-nucleotide exchange factor activity (GO:0005089)	0.212964	1	2.3218	ARHGEF15;ARHGEF7
kinase inhibitor activity (GO:0019210)	0.212964	1	2.3218	TAOK3;RHOH
ligand-gated cation channel activity (GO:0099094)	0.21833	1	2.28311	PTK2B;KCNJ2
phosphatidylinositol-4,5-bisphosphate binding (GO:0005546)	0.21833	1	2.28311	PFN1;KCNJ2
serine-type peptidase activity (GO:0008236)	0.219684	1	1.55666	TPSB2;TPP1;MMP8;KLK10;C1QC
RNA binding (GO:0003723)	0.221116	1	1.18517	TCERG1;JUN;RPL3;DDX58;IFIT5;EIF2AK2;RPSA;ZC3HAV1;IFIT1;SAMSN1;IFIT3;PATL1;IFIT2;OASL;HERC5;ZC3H7A;OAS1;OAS2;OAS3;FAM32A;SREK1;PFN1;APOBEC3A;NOP10
RNA cap binding (GO:0000339)	0.2213	1	4.02901	IFIT5
CXCR chemokine receptor binding (GO:0045236)	0.2213	1	4.02901	CXCL10
receptor antagonist activity (GO:0048019)	0.2213	1	4.02901	IL1RN
adenyl ribonucleotide binding (GO:0032559)	0.22429	1	1.47297	ATP7B;OAS1;OAS2;SPHK1;OAS3;SYN1
sequence-specific double-stranded DNA binding (GO:1990837)	0.224789	1	1.83464	EGR1;PER1;CRY2
PDZ domain binding (GO:0030165)	0.229094	1	2.20946	GNG5;DAPP1
regulatory region DNA binding (GO:0000975)	0.230286	1	1.52886	JUN;JUND;BASP1;FOS;TNF
semaphorin receptor binding (GO:0030215)	0.232679	1	3.80518	SEMA3F
ion antiporter activity (GO:0099516)	0.232679	1	3.80518	SLC26A8
oxidoreductase activity, acting on the CH-NH group of donors, NAD or NADP as acceptor (GO:0016646)	0.232679	1	3.80518	PYCR2
small GTPase binding (GO:0031267)	0.23449	1	2.17439	WAS;ARAP3
calcium ion binding (GO:0005509)	0.236113	1	1.44704	SELL;S100A13;S100A12;CDHR5;LCP1;S100A8
ubiquitin protein ligase binding (GO:0031625)	0.236113	1	1.44704	PER1;MOAP1;JUN;DDX58;ISG15;ARRB2
transcription factor activity, RNA polymerase II distal enhancer sequence-specific binding (GO:0003705)	0.239893	1	2.14041	JUN;SPI1
G-protein coupled peptide receptor activity (GO:0008528)	0.239893	1	2.14041	FPR1;GPR84
neuropilin binding (GO:0038191)	0.243892	1	3.6049	SEMA3F
dynein complex binding (GO:0070840)	0.243892	1	3.6049	DNAAF1
RNA polymerase binding (GO:0070063)	0.243892	1	3.6049	TCERG1
lysophospholipase activity (GO:0004622)	0.243892	1	3.6049	CLC
cadherin binding involved in cell-cell adhesion (GO:0098641)	0.243892	1	3.6049	S100A11
ligand-gated calcium channel activity (GO:0099604)	0.254942	1	3.42466	RASA3
intramolecular oxidoreductase activity, transposing S-S bonds (GO:0016864)	0.254942	1	3.42466	TXNDC11
mitogen-activated protein kinase binding (GO:0051019)	0.254942	1	3.42466	GCH1
protein disulfide isomerase activity (GO:0003756)	0.254942	1	3.42466	TXNDC11
poly-purine tract binding (GO:0070717)	0.254942	1	3.42466	PATL1
proteasome binding (GO:0070628)	0.254942	1	3.42466	ISG15
endopeptidase activity (GO:0004175)	0.260749	1	1.35438	TPSB2;CASP5;CASP4;ATG4B;TPP1;MMP8;C1QC
activating transcription factor binding (GO:0033613)	0.261551	1	2.0145	JUN;FOS
voltage-gated ion channel activity (GO:0005244)	0.26583	1	3.26158	PTK2B
chemokine receptor activity (GO:0004950)	0.26583	1	3.26158	CCR1
oxidoreductase activity, acting on paired donors, with incorporation or reduction of molecular oxygen, reduced flavin or flavoprotein as one donor, and incorporation of one atom of oxygen (GO:0016712)	0.26583	1	3.26158	CYP19A1
inward rectifier potassium channel activity (GO:0005242)	0.26583	1	3.26158	KCNJ2
protein binding involved in cell-cell adhesion (GO:0098632)	0.26583	1	3.26158	S100A11
ubiquitin-like protein ligase binding (GO:0044389)	0.267689	1	1.3837	PER1;MOAP1;JUN;DDX58;ISG15;ARRB2
ATPase activity, coupled to transmembrane movement of ions, phosphorylative mechanism (GO:0015662)	0.276561	1	3.11333	ATP7B
telomerase RNA binding (GO:0070034)	0.276561	1	3.11333	NOP10
bicarbonate transmembrane transporter activity (GO:0015106)	0.276561	1	3.11333	SLC26A8
histone acetyltransferase binding (GO:0035035)	0.276561	1	3.11333	EGR1
fibroblast growth factor binding (GO:0017134)	0.276561	1	3.11333	S100A13
Rho GTPase binding (GO:0017048)	0.283224	1	1.90259	WAS;RHOH
heme binding (GO:0020037)	0.283224	1	1.90259	CYBB;CYP19A1
protein phosphatase inhibitor activity (GO:0004864)	0.287134	1	2.97796	PPP1R14B
calcium-release channel activity (GO:0015278)	0.287134	1	2.97796	RASA3
miRNA binding (GO:0035198)	0.297554	1	2.85388	ZC3H7A
kinase activator activity (GO:0019209)	0.297554	1	2.85388	MADD
phosphatidylinositol phospholipase C activity (GO:0004435)	0.297554	1	2.85388	CCR1
GTPase activator activity (GO:0005096)	0.299359	1	1.37536	RGS18;JUN;RASA3;TBCD;ARAP3
hydrolase activity, acting on carbon-nitrogen (but not peptide) bonds, in linear amides (GO:0016811)	0.299445	1	1.82648	NDST1;MIER1
G-protein coupled receptor binding (GO:0001664)	0.307386	1	1.54496	RTP4;ARRB2;CCL19
actin monomer binding (GO:0003785)	0.307822	1	2.73973	PFN1
transcription cofactor binding (GO:0001221)	0.307822	1	2.73973	PER1
exoribonuclease activity, producing 5'-phosphomonoesters (GO:0016896)	0.307822	1	2.73973	USB1
N-acyltransferase activity (GO:0016410)	0.307822	1	2.73973	CERS6
syntaxin binding (GO:0019905)	0.310227	1	1.77904	CACNA1A;CPLX2
thyroid hormone receptor binding (GO:0046966)	0.317941	1	2.63435	OASL
RNA polymerase II transcription corepressor activity (GO:0001106)	0.317941	1	2.63435	TCERG1
metal ion binding (GO:0046872)	0.318888	1	1.2397	SELL;SPHK1;S100A13;S100A12;CDHR5;S100P;LCP1;S100A8
cytokine receptor binding (GO:0005126)	0.323358	1	1.49985	IL1RN;IL27;CCL19
phospholipase C activity (GO:0004629)	0.327912	1	2.53678	CCR1
beta-tubulin binding (GO:0048487)	0.327912	1	2.53678	TBCD
RNA polymerase II core promoter sequence-specific DNA binding (GO:0000979)	0.327912	1	2.53678	FOS
calmodulin-dependent protein kinase activity (GO:0004683)	0.327912	1	2.53678	PTK2B
phosphatidylinositol phosphate binding (GO:1901981)	0.331681	1	1.69119	ARAP3;DAPP1
protein kinase activity (GO:0004672)	0.335156	1	1.20163	FGR;HCK;CCL8;TAOK3;CDC37;EIF2AK2;PTK2B;CSF2RB;PRKAB1
ATP-dependent DNA helicase activity (GO:0004003)	0.337737	1	2.44618	MCM7
dicarboxylic acid transmembrane transporter activity (GO:0005310)	0.337737	1	2.44618	SLC26A8
RNA polymerase II repressing transcription factor binding (GO:0001103)	0.337737	1	2.44618	TCERG1
transcription corepressor activity (GO:0003714)	0.344533	1	1.34962	TCERG1;BASP1;TFEC;MXD1
ubiquitin conjugating enzyme binding (GO:0031624)	0.34742	1	2.36183	RNF19B
cation-transporting ATPase activity (GO:0019829)	0.34742	1	2.36183	ATP7B
nucleosomal DNA binding (GO:0031492)	0.34742	1	2.36183	ACTB
G-protein coupled receptor activity (GO:0004930)	0.350975	1	1.28264	GPR65;C3AR1;FPR1;FFAR2;GPR84
voltage-gated potassium channel activity (GO:0005249)	0.352944	1	1.6116	KCNH7;KCNJ2
snoRNA binding (GO:0030515)	0.356961	1	2.28311	NOP10
glutathione transferase activity (GO:0004364)	0.356961	1	2.28311	ALOX5AP
3'-5'-exoribonuclease activity (GO:0000175)	0.366364	1	2.20946	USB1
monocarboxylic acid transmembrane transporter activity (GO:0008028)	0.375629	1	2.14041	CEACAM1
transition metal ion transmembrane transporter activity (GO:0046915)	0.375629	1	2.14041	ATP7B
estrogen receptor binding (GO:0030331)	0.375629	1	2.14041	PADI2
E-box binding (GO:0070888)	0.393757	1	2.0145	PER1
ion channel activity (GO:0005216)	0.39471	1	1.47297	PIEZO1;CACNA1A
ion transmembrane transporter activity (GO:0015075)	0.402623	1	1.95695	PLP2
ubiquitin-like protein conjugating enzyme binding (GO:0044390)	0.402623	1	1.95695	RNF19B
neuropeptide receptor activity (GO:0008188)	0.402623	1	1.95695	GPR84
core promoter binding (GO:0001047)	0.415135	1	1.41223	SPI1;IRF9
cation transmembrane transporter activity (GO:0008324)	0.415135	1	1.41223	PIEZO1;CACNA1A
voltage-gated calcium channel activity (GO:0005245)	0.41997	1	1.85117	CACNA1A
transcription coactivator activity (GO:0003713)	0.420295	1	1.17686	RXRB;TCERG1;JUN;JUND;TFEC
transcription regulatory region sequence-specific DNA binding (GO:0000976)	0.423167	1	1.17283	RXRB;EGR1;PER1;CRY2;IER2
ATPase regulator activity (GO:0060590)	0.428454	1	1.80245	PFN1
ribosome binding (GO:0043022)	0.428454	1	1.80245	RPSA
tRNA binding (GO:0000049)	0.428454	1	1.80245	IFIT5
3'-5' exonuclease activity (GO:0008408)	0.428454	1	1.80245	USB1
voltage-gated cation channel activity (GO:0022843)	0.430226	1	1.36986	KCNH7;CACNA1A
sulfotransferase activity (GO:0008146)	0.436814	1	1.75623	HS3ST3A1
phosphatase binding (GO:0019902)	0.440171	1	1.343	CEACAM1;CRY2
DNA helicase activity (GO:0003678)	0.445053	1	1.71233	MCM7
protein kinase C binding (GO:0005080)	0.445053	1	1.71233	PLEK
histone deacetylase activity (GO:0004407)	0.445053	1	1.71233	MIER1
carboxylic ester hydrolase activity (GO:0052689)	0.445108	1	1.32996	CA1;CLC
protein deacetylase activity (GO:0033558)	0.461172	1	1.63079	MIER1
Rac GTPase binding (GO:0048365)	0.469055	1	1.59286	WAS
hydro-lyase activity (GO:0016836)	0.484479	1	1.52207	CA1
exopeptidase activity (GO:0008238)	0.484479	1	1.52207	TPP1
damaged DNA binding (GO:0003684)	0.492022	1	1.48898	CRY2
transcriptional repressor activity, RNA polymerase II transcription factor binding (GO:0001191)	0.499456	1	1.4573	TCERG1
protein phosphatase regulator activity (GO:0019888)	0.499456	1	1.4573	EIF2AK2
protein homodimerization activity (GO:0042803)	0.505442	1	1.03152	JUN;CEACAM1;FCER1G;GCH1;BCL2A1;PLEK;S100A13;S100P;LILRB2;S100A11
inorganic anion transmembrane transporter activity (GO:0015103)	0.506781	1	1.42694	SLC26A8
phospholipid transporter activity (GO:0005548)	0.506781	1	1.42694	PRELID1
protein tyrosine kinase binding (GO:1990782)	0.506781	1	1.42694	CEACAM1
phosphotransferase activity, alcohol group as acceptor (GO:0016773)	0.509614	1	1.07863	CCL8;SPHK1;EIF2AK2;PRKAB1
tubulin binding (GO:0015631)	0.512693	1	1.0744	MX2;MX1;TBCD;S100A8
ribonuclease activity (GO:0004540)	0.513999	1	1.39782	RNASE2
amyloid-beta binding (GO:0001540)	0.513999	1	1.39782	LILRB2
acetylglucosaminyltransferase activity (GO:0008375)	0.521112	1	1.36986	NDST1
Rab guanyl-nucleotide exchange factor activity (GO:0017112)	0.528121	1	1.343	MADD
phosphatidylinositol kinase activity (GO:0052742)	0.528121	1	1.343	PI4K2B
GDP binding (GO:0019003)	0.528121	1	1.343	RAB8A
repressing transcription factor binding (GO:0070491)	0.541835	1	1.29232	TCERG1
protein heterodimerization activity (GO:0046982)	0.542972	1	1.03386	JUN;BCL2A1;CYBB;FOS
microtubule binding (GO:0008017)	0.544104	1	1.05374	MX2;MX1;S100A8
serine-type endopeptidase activity (GO:0004252)	0.547566	1	1.04836	TPSB2;MMP8;C1QC
SH3 domain binding (GO:0017124)	0.555151	1	1.24533	WAS
protein kinase activator activity (GO:0030295)	0.555151	1	1.24533	MADD
actin filament binding (GO:0051015)	0.5557	1	1.07863	WAS;LCP1
magnesium ion binding (GO:0000287)	0.5557	1	1.07863	SPHK1;S100P
chloride transmembrane transporter activity (GO:0015108)	0.561664	1	1.22309	SLC26A8
nuclear hormone receptor binding (GO:0035257)	0.561664	1	1.22309	OASL
transferase activity, transferring acyl groups other than amino-acyl groups (GO:0016747)	0.561664	1	1.22309	CERS6
RNA polymerase II regulatory region DNA binding (GO:0001012)	0.564643	1	1.02229	RXRB;EGR1;IER2
nuclease activity (GO:0004518)	0.580637	1	1.1609	RNASE2
transcription factor activity, RNA polymerase II core promoter proximal region sequence-specific binding (GO:0000982)	0.586514	1	0.978474	JUN;TFEC;FOS;MXD1
kinase activity (GO:0016301)	0.586514	1	0.978474	CCL8;SPHK1;EIF2AK2;PRKAB1
chloride channel activity (GO:0005254)	0.592829	1	1.12284	SLC26A8
ubiquitin binding (GO:0043130)	0.598792	1	1.10473	UBE2L6
anion transmembrane transporter activity (GO:0008509)	0.598792	1	1.10473	SLC26A8
metalloendopeptidase activity (GO:0004222)	0.616163	1	1.05374	MMP8
anion channel activity (GO:0005253)	0.621786	1	1.03778	SLC26A8
protein kinase inhibitor activity (GO:0004860)	0.627326	1	1.02229	TAOK3
methyltransferase activity (GO:0008168)	0.627326	1	1.02229	METTL7B
cation channel activity (GO:0005261)	0.631589	1	0.938262	PIEZO1;CACNA1A
phospholipase activity (GO:0004620)	0.638165	1	0.992654	CLC
organic anion transmembrane transporter activity (GO:0008514)	0.643466	1	0.978474	SLC26A8
DNA-dependent ATPase activity (GO:0008094)	0.653837	1	0.951294	MCM7
DNA binding (GO:0003677)	0.656881	1	0.920401	ZBP1;EGR1;JUN;MCM7;SPHK1;CRY2;IFIT5;HESX1;IER2;HIST2H2BE;HIST1H2BC;OASL
core promoter sequence-specific DNA binding (GO:0001046)	0.658909	1	0.938262	FOS
endonuclease activity (GO:0004519)	0.658909	1	0.938262	RNASE2
ubiquitin-like protein-specific protease activity (GO:0019783)	0.663907	1	0.925583	BAP1
cadherin binding (GO:0045296)	0.673278	1	0.875312	S100P;ZC3HAV1;PFN1;S100A11
steroid hormone receptor binding (GO:0035258)	0.673686	1	0.901226	PADI2
thiol-dependent ubiquitin-specific protease activity (GO:0004843)	0.673686	1	0.901226	BAP1
calcium ion transmembrane transporter activity (GO:0015085)	0.678468	1	0.889521	CACNA1A
MAP kinase kinase kinase activity (GO:0004709)	0.68318	1	0.878117	TAOK3
immunoglobulin receptor binding (GO:0034987)	0.696909	1	0.845594	FGR
RNA polymerase II transcription cofactor activity (GO:0001104)	0.710044	1	0.815395	TCERG1
ATP-dependent helicase activity (GO:0008026)	0.714296	1	0.805802	MCM7
histone deacetylase binding (GO:0042826)	0.714296	1	0.805802	MIER1
single-stranded DNA binding (GO:0003697)	0.722612	1	0.787278	CRY2
ubiquitin-protein transferase activity (GO:0004842)	0.731419	1	0.821261	HERC5;FBXW5;RNF19B;UBE2L6;TRIM21
thiol-dependent ubiquitinyl hydrolase activity (GO:0036459)	0.742364	1	0.744491	BAP1
calcium channel activity (GO:0005262)	0.746143	1	0.736485	CACNA1A
integrin binding (GO:0005178)	0.749867	1	0.728651	LCP1
Ras GTPase binding (GO:0017016)	0.752544	1	0.744491	RHOH;RAB8A
ubiquitin-like protein ligase activity (GO:0061659)	0.75785	1	0.736485	HERC5;RNF19B
transcriptional repressor activity, RNA polymerase II core promoter proximal region sequence-specific binding (GO:0001078)	0.760714	1	0.706115	MXD1
phosphatidylinositol binding (GO:0035091)	0.771093	1	0.684932	DAPP1
potassium channel activity (GO:0005267)	0.771093	1	0.684932	KCNH7
ubiquitin protein ligase activity (GO:0061630)	0.773183	1	0.71347	HERC5;RNF19B
metallopeptidase activity (GO:0008237)	0.777761	1	0.671501	MMP8
transcriptional activator activity, RNA polymerase II transcription regulatory region sequence-specific binding (GO:0001228)	0.786791	1	0.723519	RXRB;TFEC;IER2
Rab GTPase binding (GO:0017137)	0.853132	1	0.52687	RAB8A
transcriptional repressor activity, RNA polymerase II transcription regulatory region sequence-specific binding (GO:0001227)	0.904426	1	0.430775	MXD1
protein serine/threonine kinase activity (GO:0004674)	0.907154	1	0.558368	TAOK3;EIF2AK2;PTK2B
transcriptional activator activity, RNA polymerase II core promoter proximal region sequence-specific binding (GO:0001077)	0.924616	1	0.391389	TFEC
ATPase activity (GO:0016887)	0.950258	1	0.337405	ATP5J2
sequence-specific DNA binding (GO:0043565)	0.997126	1	0.17384	EGR1

## Sheet: GO Biological Process
Term	P-value	Adjusted P-value	Odds Ratio	Genes
cytokine-mediated signaling pathway (GO:0019221)	3.43085e-17	1.75076e-13	4.65277	IFITM3;IFITM1;IL1RN;IFITM2;CCL11;CSF3R;FPR1;IFI6;IL27;CSF2RB;IFIT1;IL2RG;TNF;IFIT3;IFIT2;TNFSF13B;OASL;CA1;CCL8;CCL7;CCL4;PTK2B;CCL19;TRIM21;CCR1;EGR1;HLA-DRB5;TNFSF14;MX2;MX1;ISG15;FOS;HCK;CXCL10;CEACAM1;OAS1;OAS2;OAS3;PLP2;LCP1;TRIM38;XAF1;IRF9
cellular response to type I interferon (GO:0071357)	3.88202e-17	9.90498e-14	17.9136	IFITM3;EGR1;IFITM1;IFITM2;MX2;MX1;IFI6;ISG15;IFIT1;IFIT3;IFIT2;OASL;OAS1;OAS2;OAS3;XAF1;IRF9
type I interferon signaling pathway (GO:0060337)	3.88202e-17	6.60332e-14	17.9136	IFITM3;EGR1;IFITM1;IFITM2;MX2;MX1;IFI6;ISG15;IFIT1;IFIT3;IFIT2;OASL;OAS1;OAS2;OAS3;XAF1;IRF9
negative regulation of viral genome replication (GO:0045071)	2.89761e-16	3.69662e-13	20.5479	IFITM3;IFITM1;IFITM2;MX1;IFIT5;EIF2AK2;ISG15;ZC3HAV1;IFIT1;TNF;OASL;OAS1;OAS2;OAS3;APOBEC3A
negative regulation of viral life cycle (GO:1903901)	3.17419e-16	3.23958e-13	17.9654	IFITM3;IFITM1;IFITM2;MX1;IFIT5;EIF2AK2;ISG15;ZC3HAV1;IFIT1;TNF;OASL;OAS1;OAS2;OAS3;TRIM21;APOBEC3A
regulation of viral genome replication (GO:0045069)	1.32664e-14	1.12831e-11	16.3079	IFITM3;IFITM1;IFITM2;MX1;IFIT5;EIF2AK2;ISG15;ZC3HAV1;IFIT1;TNF;OASL;OAS1;OAS2;OAS3;APOBEC3A
neutrophil degranulation (GO:0043312)	2.57248e-14	1.87534e-11	4.86173	SERPINA1;CRISP3;FGL2;FPR1;GPR84;SIRPB1;PLAC8;ACTR1B;C3AR1;S100A12;OLR1;S100A11;CD53;FCER1G;CR1;CYBB;LILRB2;RNASE2;LILRB3;MMP8;CEACAM3;FGR;CEACAM1;CLEC4D;DOK3;TYROBP;BIN2;SELL;TCN1;PADI2;CHI3L1;CYSTM1;S100P;S100A8
neutrophil activation involved in immune response (GO:0002283)	3.27539e-14	2.08929e-11	4.82146	SERPINA1;CRISP3;FGL2;FPR1;GPR84;SIRPB1;PLAC8;ACTR1B;C3AR1;S100A12;OLR1;S100A11;CD53;FCER1G;CR1;CYBB;LILRB2;RNASE2;LILRB3;MMP8;CEACAM3;FGR;CEACAM1;CLEC4D;DOK3;TYROBP;BIN2;SELL;TCN1;PADI2;CHI3L1;CYSTM1;S100P;S100A8
neutrophil mediated immunity (GO:0002446)	4.1599e-14	2.35866e-11	4.78186	SERPINA1;CRISP3;FGL2;FPR1;GPR84;SIRPB1;PLAC8;ACTR1B;C3AR1;S100A12;OLR1;S100A11;CD53;FCER1G;CR1;CYBB;LILRB2;RNASE2;LILRB3;MMP8;CEACAM3;FGR;CEACAM1;CLEC4D;DOK3;TYROBP;BIN2;SELL;TCN1;PADI2;CHI3L1;CYSTM1;S100P;S100A8
cellular response to interferon-gamma (GO:0071346)	1.49598e-10	7.63397e-08	8.85687	HLA-DRB5;CCL11;OASL;HCK;CCL8;OAS1;CCL7;OAS2;OAS3;CCL4;LGALS9;CCL19;TRIM38;TRIM21;IRF9
response to cytokine (GO:0034097)	1.9145e-10	8.88154e-08	7.94123	IFITM3;IFITM1;JUN;IFITM2;JUND;GCH1;MX2;MX1;EIF2AK2;ISG15;CXCL16;LAMP3;CHI3L1;LGALS9;XAF1;TRIM21
response to interferon-gamma (GO:0034341)	2.6309e-10	1.11879e-07	12.087	IFITM3;IFITM1;IFITM2;CCL11;CCL8;CCL7;GCH1;CCL4;LGALS9;CCL19;TRIM21;CXCL16
response to interferon-alpha (GO:0035455)	9.94596e-08	3.90417e-05	24.1741	IFITM3;IFITM1;IFITM2;MX2;LAMP3;EIF2AK2
regulation of nuclease activity (GO:0032069)	6.5248e-07	0.000237829	45.6621	OAS1;OAS2;OAS3;OASL
interferon-gamma-mediated signaling pathway (GO:0060333)	7.94722e-07	0.000270364	8.80626	HCK;HLA-DRB5;OAS1;OAS2;OAS3;TRIM38;TRIM21;IRF9;OASL
chemokine-mediated signaling pathway (GO:0070098)	8.08559e-07	0.00025788	10.5374	CCR1;CXCL10;CCL11;CCL8;CCL7;CCL4;PTK2B;CCL19
neutrophil chemotaxis (GO:0030593)	9.40345e-07	0.000282269	10.3386	FCER1G;CCL11;CCL8;CCL7;CCL4;S100A12;CCL19;S100A8
granulocyte chemotaxis (GO:0071621)	1.45103e-06	0.000411366	9.78474	FCER1G;CCL11;CCL8;CCL7;CCL4;S100A12;CCL19;S100A8
positive regulation of cytoskeleton organization (GO:0051495)	1.80315e-06	0.000484289	8.00569	HCK;CCL11;PLEK;RAC2;RHOH;STAP1;PTK2B;PFN1;NES
neutrophil migration (GO:1990266)	1.90916e-06	0.000487122	9.44733	FCER1G;CCL11;CCL8;CCL7;CCL4;S100A12;CCL19;S100A8
lymphocyte chemotaxis (GO:0048247)	3.1751e-06	0.000771548	10.8966	CXCL10;CCL11;CCL8;CCL7;CCL4;CCL19;CXCL16
negative regulation of natural killer cell mediated cytotoxicity (GO:0045953)	5.29393e-06	0.00122795	30.4414	CEACAM1;SERPINB9;ARRB2;LGALS9
positive regulation of actin filament polymerization (GO:0030838)	8.79108e-06	0.00195047	9.40102	HCK;CCL11;RAC2;WAS;RHOH;PTK2B;PFN1
regulation of I-kappaB kinase/NF-kappaB signaling (GO:0043122)	1.00613e-05	0.00213929	4.36476	IFIT5;RHOH;TNF;PER1;MIER1;BCL3;TNFSF10;S100A13;S100A12;LGALS9;CCL19;CARD16;TRIM38
cellular response to cytokine stimulus (GO:0071345)	1.36263e-05	0.00278141	3.00409	CCR1;EGR1;IL1RN;CCL11;CSF3R;FPR1;CSF2RB;FOS;IFIT1;IL2RG;TNF;HCK;CXCL10;CCL8;CCL7;CCL4;CHI3L1;LGALS9;CCL19;PLP2
inflammatory response (GO:0006954)	2.17527e-05	0.00426939	3.80518	CCL11;FPR1;CYBB;FOS;TNF;CXCL10;CCL8;CCL7;CCL4;C3AR1;CHI3L1;LGALS9;CCL19;S100A8
monocyte chemotaxis (GO:0002548)	2.69168e-05	0.00508728	10.0234	CCL11;CCL8;CCL7;CCL4;S100A12;CCL19
positive regulation of I-kappaB kinase/NF-kappaB signaling (GO:0043123)	2.86244e-05	0.00521679	4.62224	SPHK1;MIER1;IFIT5;TNFSF10;S100A13;S100A12;LGALS9;CARD16;CCL19;TRIM38;TNF
regulation of NF-kappaB import into nucleus (GO:0042345)	3.27866e-05	0.00576931	13.1718	SPHK1;BCL3;CCL19;LGALS9;TNF
regulation of viral entry into host cell (GO:0046596)	3.27866e-05	0.005577	13.1718	IFITM3;IFITM1;IFITM2;LGALS9;TRIM38
positive regulation of NF-kappaB import into nucleus (GO:0042346)	5.35124e-05	0.00880883	18.2648	SPHK1;CCL19;LGALS9;TNF
negative regulation of protein binding (GO:0032091)	5.41158e-05	0.00862978	7.156	TFIP11;ARRB2;CARD16;IFIT1;NES;ACTB;IFIT2
regulation of cell migration (GO:0030334)	6.83614e-05	0.0105712	3.25126	CCR1;IFITM1;CCL11;DDX58;SPHK1;ARAP3;SEMA3F;CXCL16;RND1;FGR;CEACAM1;CCL7;PODXL;PLXNA2;PTK2B
response to tumor necrosis factor (GO:0034612)	8.80831e-05	0.0132202	5.64892	CCL11;CCL8;CCL7;GCH1;CCL4;CHI3L1;CCL19;CXCL16
positive regulation of lymphocyte migration (GO:2000403)	9.11773e-05	0.0132937	16.116	CXCL10;CCL7;CCL4;PTK2B
positive regulation of transcription factor import into nucleus (GO:0042993)	9.34308e-05	0.0132438	10.7021	DDX58;SPHK1;CCL19;LGALS9;TNF
positive regulation of MAPK cascade (GO:0043410)	9.60988e-05	0.0132538	3.31801	CCR1;CCL11;EIF2AK2;ARRB2;TNF;CCL8;TAOK3;CCL7;CCL4;S100A12;CHI3L1;PTK2B;LGALS9;CCL19
response to lipopolysaccharide (GO:0032496)	9.61951e-05	0.012918	4.41891	CXCL10;JUN;JUND;GCH1;CARD17;LY96;STAP1;LGALS9;CARD16;LILRB2
response to type I interferon (GO:0034340)	0.000103225	0.0135067	29.3542	MX1;ISG15;IFIT1
regulation of chemokine production (GO:0032642)	0.000115885	0.0147841	15.2207	EIF2AK2;FFAR2;LGALS9;TNF
response to interleukin-1 (GO:0070555)	0.000121662	0.0151425	6.30858	CCL11;CCL8;CCL7;CCL4;CHI3L1;LGALS9;CCL19
positive regulation of chemokine production (GO:0032722)	0.000126057	0.0153159	10.0725	EGR1;EIF2AK2;FFAR2;LGALS9;TNF
response to interferon-beta (GO:0035456)	0.000145108	0.0172206	14.4196	IFITM3;IFITM1;IFITM2;XAF1
negative regulation of leukocyte mediated cytotoxicity (GO:0001911)	0.000163376	0.0189479	25.6849	CEACAM1;ARRB2;LGALS9
positive regulation of ERK1 and ERK2 cascade (GO:0070374)	0.000188323	0.0213558	3.74838	CCR1;CCL11;CCL8;CCL7;CCL4;CHI3L1;PTK2B;LGALS9;CCL19;ARRB2;TNF
negative regulation of binding (GO:0051100)	0.000196407	0.0217883	5.84698	JUN;TFIP11;CARD16;IFIT1;NES;ACTB;IFIT2
cellular response to oxygen-containing compound (GO:1901701)	0.000208383	0.022625	3.24968	EGR1;JUN;FOS;LILRB2;ACTB;CXCL10;GNG2;CARD17;STAP1;PTK2B;FFAR2;MPV17;CARD16
negative regulation of cytokine production (GO:0001818)	0.000212133	0.0225524	4.98132	HERC5;SRGN;CEACAM1;DDX58;UBE2L6;ISG15;LGALS9;TNF
positive regulation of supramolecular fiber organization (GO:1902905)	0.000228272	0.0237729	5.70776	HCK;CCL11;PLEK;RAC2;RHOH;PTK2B;PFN1
positive regulation of leukocyte chemotaxis (GO:0002690)	0.000260381	0.0265744	6.73703	CCR1;CXCL10;CCL7;CCL4;PTK2B;LGALS9
regulation of ERK1 and ERK2 cascade (GO:0070372)	0.000293015	0.0293187	3.3276	CCR1;CEACAM1;CCL11;CCL8;CCL7;CCL4;CHI3L1;PTK2B;LGALS9;CCL19;ARRB2;TNF
positive regulation of cell motility (GO:2000147)	0.000311275	0.0305469	3.82643	CCR1;FGR;CCL11;CCL7;PODXL;SPHK1;PTK2B;SEMA3F;CCL19;CXCL16
regulation of phagocytosis (GO:0050764)	0.000312342	0.0300732	8.35282	FGR;HCK;FCER1G;TNF;SIRPB1
negative regulation of viral transcription (GO:0032897)	0.000316605	0.0299192	11.9119	IFITM3;JUN;CCL4;TRIM21
positive regulation of protein polymerization (GO:0032273)	0.000338976	0.0314508	6.42123	HCK;CCL11;RAC2;RHOH;PTK2B;PFN1
regulation of granulocyte differentiation (GO:0030852)	0.000342574	0.0312171	20.5479	CEACAM1;EVI2B;C1QC
regulation of podosome assembly (GO:0071801)	0.000342574	0.0306694	20.5479	HCK;LCP1;TNF
cellular response to lipopolysaccharide (GO:0071222)	0.000374079	0.0329125	5.2687	HCK;CXCL10;CARD17;STAP1;CARD16;LILRB2;TNF
eosinophil chemotaxis (GO:0048245)	0.000375587	0.0324851	11.4155	CCL11;CCL8;CCL7;CCL4
eosinophil migration (GO:0072677)	0.000375587	0.0319437	11.4155	CCL11;CCL8;CCL7;CCL4
positive regulation of cell migration (GO:0030335)	0.000424632	0.0355229	3.40916	CCR1;FGR;CCL11;CCL7;PODXL;SPHK1;PTK2B;SEMA3F;PFN1;ARHGEF7;CXCL16
negative regulation of bone mineralization (GO:0030502)	0.00046596	0.0383515	18.68	CCR1;SRGN;PTK2B
regulation of actin filament polymerization (GO:0030833)	0.000471364	0.0381805	6.04351	HCK;CCL11;RAC2;RHOH;PTK2B;PFN1
cellular response to tumor necrosis factor (GO:0071356)	0.000586877	0.0467942	3.53057	CCL11;CCL8;TNFSF14;CCL7;CCL4;CHI3L1;PTK2B;CCL19;TNF;TNFSF13B
positive regulation of NF-kappaB transcription factor activity (GO:0051092)	0.000590954	0.0463944	4.28082	SPHK1;S100A12;EIF2AK2;LGALS9;CARD16;TRIM38;TNF;S100A8
negative regulation of biomineral tissue development (GO:0070168)	0.000995081	0.0769378	14.6771	CCR1;SRGN;PTK2B
regulation of cytokine production (GO:0001817)	0.00104477	0.0795738	4.43937	ZBP1;PER1;DDX58;EIF2AK2;ISG15;TNF;TRIM21
negative regulation of viral entry into host cell (GO:0046597)	0.00123047	0.0923399	13.6986	IFITM3;IFITM1;IFITM2
positive regulation of sequence-specific DNA binding transcription factor activity (GO:0051091)	0.00128634	0.0951331	3.18573	DDX58;SPHK1;S100A12;EIF2AK2;LGALS9;CARD16;TRIM38;TRIM21;TNF;S100A8
positive regulation of cell-cell adhesion (GO:0022409)	0.00130462	0.0951068	8.3022	PODXL;PIEZO1;TNF;SIRPB1
regulation of phosphatidylinositol 3-kinase activity (GO:0043551)	0.00130462	0.0937673	8.3022	FGR;PIK3IP1;PTK2B;CCL19
regulation of tumor necrosis factor-mediated signaling pathway (GO:0010803)	0.0013325	0.0944413	6.11546	SPHK1;CASP4;MADD;CARD16;TNF
regulation of interleukin-1 beta secretion (GO:0050706)	0.00146176	0.102183	8.05802	CARD17;CCL19;LGALS9;CARD16
positive regulation of cytokine production (GO:0001819)	0.00152692	0.105296	3.11333	ZBP1;FGR;GBP5;DDX58;EIF2AK2;FFAR2;LGALS9;CCL19;LILRB2;TNF
regulation of type I interferon production (GO:0032479)	0.00153255	0.104275	4.83481	HERC5;ZBP1;DDX58;UBE2L6;ISG15;TRIM21
integrin-mediated signaling pathway (GO:0007229)	0.00156105	0.104816	5.90458	FGR;HCK;CEACAM1;PLEK;PTK2B
positive regulation of protein complex assembly (GO:0031334)	0.00183133	0.121367	4.66999	GBP5;JUN;PLEK;PIEZO1;LCP1;TNF
positive regulation of intracellular signal transduction (GO:1902533)	0.00191252	0.125123	2.28787	IFIT5;EIF2AK2;TNF;FGR;CXCL10;MIER1;CCL4;TNFSF10;S100A13;S100A12;CHI3L1;LGALS9;CCL19;CARD16;TRIM38;S100A8
positive regulation of phagocytosis (GO:0050766)	0.00244871	0.158174	7.02494	FCER1G;STAP1;TNF;SIRPB1
regulation of RNA metabolic process (GO:0051252)	0.00244871	0.156197	7.02494	OAS1;OAS2;OAS3;OASL
positive regulation of mononuclear cell migration (GO:0071677)	0.00250978	0.158116	10.8147	CCR1;CXCL10;TNF
positive regulation of pri-miRNA transcription from RNA polymerase II promoter (GO:1902895)	0.00250978	0.156188	10.8147	JUN;SPI1;FOS
negative regulation of cytokine-mediated signaling pathway (GO:0001960)	0.00268995	0.165383	6.84932	IL1RN;STAP1;PADI2;CARD16
cellular metal ion homeostasis (GO:0006875)	0.00284423	0.172787	4.28082	CCR1;CCL11;CCL8;CCL7;CCL19;KCNJ2
immune response-activating cell surface receptor signaling pathway (GO:0002429)	0.00292104	0.175365	10.274	FCER1G;FPR1;C3AR1
regulation of T cell tolerance induction (GO:0002664)	0.00306532	0.181887	22.8311	CLC;LILRB2
positive regulation of podosome assembly (GO:0071803)	0.00306532	0.179797	22.8311	LCP1;TNF
negative regulation of glucocorticoid receptor signaling pathway (GO:2000323)	0.00306532	0.177754	22.8311	PER1;CRY2
negative regulation of leukocyte degranulation (GO:0043301)	0.00306532	0.175756	22.8311	CEACAM1;LGALS9
regulation of inositol phosphate biosynthetic process (GO:0010919)	0.00306532	0.173804	22.8311	PLEK;PTK2B
regulation of cytokine production involved in immune response (GO:0002718)	0.00306532	0.171894	22.8311	FFAR2;CLC
regulation of inflammatory response (GO:0050727)	0.00310264	0.172096	3.30087	HCK;PER1;CASP5;CASP4;CCL4;S100A12;FFAR2;S100A8
response to molecule of bacterial origin (GO:0002237)	0.00315252	0.172982	4.19346	CXCL10;JUN;JUND;GCH1;LY96;LGALS9
mitochondrion organization (GO:0007005)	0.00321856	0.174727	3.28111	BCL2A1;MX2;MX1;TIMM23;MPV17;TRAK1;SLC25A4;IFIT2
cortical actin cytoskeleton organization (GO:0030866)	0.00337138	0.181097	9.78474	PLEK;WAS;TNF
substantia nigra development (GO:0021762)	0.00351043	0.186601	6.37146	CASP5;BASP1;PADI2;ACTB
positive regulation of interleukin-8 production (GO:0032757)	0.0038178	0.200848	6.22665	DDX58;FFAR2;LGALS9;TNF
negative regulation of type I interferon production (GO:0032480)	0.0038178	0.198798	6.22665	HERC5;DDX58;UBE2L6;ISG15
positive regulation of actin filament bundle assembly (GO:0032233)	0.0038178	0.19679	6.22665	ARHGEF15;GPR65;PLEK;PFN1
positive regulation of lipid transport (GO:0032370)	0.00425016	0.216886	19.5695	PRELID1;CYP19A1
leukocyte aggregation (GO:0070486)	0.00425016	0.214738	19.5695	RAC2;S100A8
regulation of natural killer cell chemotaxis (GO:2000501)	0.00425016	0.212633	19.5695	CCL7;CCL4
negative regulation of synapse organization (GO:1905809)	0.00425016	0.210569	19.5695	ARHGEF15;LILRB2
regulation of T-helper 1 cell differentiation (GO:0045625)	0.00425016	0.208544	19.5695	IL27;CCL19
regulation of chemokine biosynthetic process (GO:0045073)	0.00425016	0.206558	19.5695	EGR1;TNF
chitin metabolic process (GO:0006030)	0.00425016	0.204609	19.5695	CHI3L2;CHI3L1
regulation of dendritic cell differentiation (GO:2001198)	0.00425016	0.202697	19.5695	LILRB2;LGALS9
regulation of glucocorticoid receptor signaling pathway (GO:2000322)	0.00425016	0.20082	19.5695	PER1;CRY2
regulation of cell-cell adhesion mediated by integrin (GO:0033632)	0.00425016	0.198978	19.5695	PODXL;PIEZO1
chitin catabolic process (GO:0006032)	0.00425016	0.197169	19.5695	CHI3L2;CHI3L1
detection of molecule of bacterial origin (GO:0032490)	0.00425016	0.195393	19.5695	DMBT1;LY96
regulation of peptide hormone secretion (GO:0090276)	0.00428756	0.195352	4.69131	MARCKS;CACNA1A;FFAR2;TNF;SLC25A4
positive regulation of cytokine secretion (GO:0050715)	0.00428756	0.193623	4.69131	FGR;DDX58;FFAR2;LGALS9;TNF
regulation of defense response (GO:0031347)	0.00481222	0.21541	4.56621	HERC5;FGR;HCK;CASP5;CASP4
positive regulation of tumor necrosis factor production (GO:0032760)	0.00484812	0.21513	5.8292	DDX58;LY96;CCL19;LGALS9
regulation of actin filament bundle assembly (GO:0032231)	0.00496776	0.218539	8.56164	PLEK;WAS;PFN1
mucosal immune response (GO:0002385)	0.00496776	0.216671	8.56164	FFAR2;HIST2H2BE;HIST1H2BC
regulation of cell motility (GO:2000145)	0.00531267	0.229751	3.77027	CEACAM1;DDX58;PLXNA2;WAS;CCL19;RND1
positive regulation of cysteine-type endopeptidase activity involved in apoptotic process (GO:0043280)	0.00531267	0.22782	3.77027	CASP5;CASP4;TNFSF10;LGALS9;TNF;S100A8
positive regulation of phosphatidylinositol 3-kinase activity (GO:0043552)	0.00558491	0.237498	8.21918	FGR;PTK2B;CCL19
regulation of microvillus organization (GO:0032530)	0.00561243	0.236696	17.1233	PODXL;CDHR5
regulation of T cell mediated immunity (GO:0002709)	0.00561243	0.234756	17.1233	WAS;CLC
bone resorption (GO:0045453)	0.00561243	0.232847	17.1233	PTK2B;TPP1
positive regulation of viral entry into host cell (GO:0046598)	0.00561243	0.23097	17.1233	TRIM38;LGALS9
immunoglobulin mediated immune response (GO:0016064)	0.00561243	0.229122	17.1233	FCER1G;GAPT
regulation of protein binding (GO:0043393)	0.00579924	0.234869	3.70233	TFIP11;CARD16;IFIT1;NES;ACTB;IFIT2
activation of cysteine-type endopeptidase activity involved in apoptotic process (GO:0006919)	0.00599555	0.240908	4.33501	CASP5;CASP4;TNFSF10;TNF;S100A8
regulation of bone mineralization (GO:0030500)	0.00605027	0.241207	5.47945	SRGN;CCR1;PTK2B;ISG15
regulation of pri-miRNA transcription from RNA polymerase II promoter (GO:1902893)	0.00624602	0.247081	7.90306	JUN;SPI1;FOS
cellular response to interleukin-1 (GO:0071347)	0.00658437	0.258462	3.19635	EGR1;IL1RN;CCL11;CCL8;CCL7;CCL4;CCL19
cellular response to oxidative stress (GO:0034599)	0.00686877	0.267567	3.57356	JUN;GPX2;CYBB;PYCR2;MPV17;FOS
positive regulation of lipid kinase activity (GO:0090218)	0.00695186	0.268752	7.61035	FGR;PTK2B;CCL19
negative regulation of myeloid leukocyte differentiation (GO:0002762)	0.00695186	0.266732	7.61035	CEACAM1;LILRB3;C1QC
secretory granule organization (GO:0033363)	0.00714673	0.272162	15.2207	SRGN;BLOC1S1
negative regulation of leukocyte chemotaxis (GO:0002689)	0.00714673	0.270146	15.2207	STAP1;PADI2
dynamin family protein polymerization involved in membrane fission (GO:0003373)	0.00714673	0.26816	15.2207	MX2;MX1
response to UV-C (GO:0010225)	0.00714673	0.266202	15.2207	BCL3;CARD16
regulation of integrin activation (GO:0033623)	0.00714673	0.264273	15.2207	PLEK;PIEZO1
interleukin-1 secretion (GO:0050701)	0.00714673	0.262372	15.2207	GBP5;S100A13
engulfment of apoptotic cell (GO:0043652)	0.00714673	0.260498	15.2207	RAC2;RHOH
dynamin family protein polymerization involved in mitochondrial fission (GO:0003374)	0.00714673	0.258651	15.2207	MX2;MX1
mast cell mediated immunity (GO:0002448)	0.00714673	0.256829	15.2207	S100A13;SERPINB9
positive regulation of phospholipid metabolic process (GO:1903727)	0.00770313	0.274889	7.33855	FGR;PTK2B;CCL19
cellular response to molecule of bacterial origin (GO:0071219)	0.00774525	0.274472	4.07697	CXCL10;CARD17;STAP1;CARD16;LILRB2
enzyme linked receptor protein signaling pathway (GO:0007167)	0.00839822	0.295559	3.42466	FGR;HCK;STAP1;PTK2B;LCP2;PILRA
lysosome localization (GO:0032418)	0.00850049	0.29711	7.0855	BLOC1S1;S100A13;PLEKHM2
respiratory system development (GO:0060541)	0.00850049	0.295088	7.0855	BASP1;DNAAF1;CHI3L1
glucosamine-containing compound catabolic process (GO:1901072)	0.00884777	0.305069	13.6986	CHI3L2;CHI3L1
regulation of NLRP3 inflammasome complex assembly (GO:1900225)	0.00884777	0.303021	13.6986	GBP5;EIF2AK2
T cell chemotaxis (GO:0010818)	0.00884777	0.301001	13.6986	CXCL10;CXCL16
positive regulation of T cell apoptotic process (GO:0070234)	0.00884777	0.299008	13.6986	PRELID1;LGALS9
negative regulation of interleukin-1 beta secretion (GO:0050713)	0.00884777	0.297041	13.6986	CARD17;CARD16
endosomal vesicle fusion (GO:0034058)	0.00884777	0.295099	13.6986	SAMD9L;SAMD9
complement receptor mediated signaling pathway (GO:0002430)	0.00884777	0.293183	13.6986	C3AR1;FPR1
regulation of dendritic cell apoptotic process (GO:2000668)	0.00884777	0.291291	13.6986	CCL19;LGALS9
calcium ion homeostasis (GO:0055074)	0.00895026	0.292777	3.93639	CCR1;CCL11;CCL8;CCL7;CCL19
cellular defense response (GO:0006968)	0.00901557	0.293035	4.89237	TYROBP;LY96;PTK2B;LILRB2
defense response to bacterium (GO:0042742)	0.00918555	0.29667	2.55784	FGR;FCER1G;DMBT1;S100A12;ISG15;HAMP;HIST2H2BE;S100A8;HIST1H2BC
regulation of actin cytoskeleton reorganization (GO:2000249)	0.00934452	0.299906	6.84932	HCK;STAP1;PTK2B
positive regulation of interleukin-1 beta production (GO:0032731)	0.0102358	0.326457	6.62837	EGR1;CCL19;LGALS9
regulation of cytokine secretion (GO:0050707)	0.0102358	0.324429	6.62837	SRGN;FGR;TNF
interleukin-2-mediated signaling pathway (GO:0038110)	0.0107104	0.337378	12.4533	PTK2B;IL2RG
immune response-regulating cell surface receptor signaling pathway (GO:0002768)	0.0107104	0.335308	12.4533	FGR;LILRB2
positive regulation of tumor necrosis factor secretion (GO:1904469)	0.0107104	0.333263	12.4533	DDX58;LGALS9
cellular response to interleukin-2 (GO:0071352)	0.0107104	0.331244	12.4533	PTK2B;IL2RG
response to corticosteroid (GO:0031960)	0.0107104	0.329248	12.4533	IL1RN;TNF
regulation of cell-cell adhesion (GO:0022407)	0.0111747	0.341463	6.42123	CEACAM1;PODXL;SIRPB1
positive regulation of myeloid leukocyte differentiation (GO:0002763)	0.0111747	0.33943	6.42123	CCR1;EVI2B;TNF
cell chemotaxis (GO:0060326)	0.0114411	0.345466	4.56621	BIN2;C3AR1;FPR1;ARRB2
regulation of stress fiber assembly (GO:0051492)	0.0114411	0.343434	4.56621	ARHGEF15;GPR65;WAS;PFN1
response to reactive oxygen species (GO:0000302)	0.0114411	0.341425	4.56621	JUN;MPV17;FOS;CCL19
regulation of cysteine-type endopeptidase activity involved in apoptotic process (GO:0043281)	0.0117367	0.348211	3.68243	LAMP3;TNFSF10;IFI6;CARD16;TNF
actin cytoskeleton reorganization (GO:0031532)	0.0121067	0.357112	4.49135	GPR65;PLEK;RAC2;RHOH
positive regulation of protein depolymerization (GO:1901881)	0.0127296	0.373328	11.4155	PLEK;NES
response to prostaglandin E (GO:0034695)	0.0127296	0.371194	11.4155	GNG2;CCL19
regulation of interleukin-8 biosynthetic process (GO:0045414)	0.0127296	0.369085	11.4155	BCL3;TNF
negative regulation by host of viral transcription (GO:0043922)	0.0127296	0.367	11.4155	JUN;CCL4
negative regulation of interleukin-1 secretion (GO:0050711)	0.0127296	0.364938	11.4155	CARD17;CARD16
regulation of T cell proliferation (GO:0042129)	0.0127966	0.36481	4.41891	IL27;CCL19;LILRB2;CLC
apoptotic mitochondrial changes (GO:0008637)	0.0131971	0.374139	6.04351	BCL2A1;IFI6;IFIT2
positive regulation of hydrolase activity (GO:0051345)	0.0133753	0.377094	2.78751	CCL11;CCL8;CCL7;CCL4;CCL19;PFN1;ARHGEF7
regulation of cell cycle (GO:0051726)	0.0139537	0.39124	2.54858	JUN;JUND;PPP1R13B;TAOK3;MX2;MADD;TRIM21;BAP1
positive regulation of endocytosis (GO:0045807)	0.0142506	0.39738	4.28082	FCER1G;CCL19;TNF;SIRPB1
positive regulation of NIK/NF-kappaB signaling (GO:1901224)	0.0142814	0.396076	5.87084	EIF2AK2;CHI3L1;TNF
antibacterial humoral response (GO:0019731)	0.0142814	0.393935	5.87084	DMBT1;HIST2H2BE;HIST1H2BC
cellular response to exogenous dsRNA (GO:0071360)	0.0149003	0.408798	10.5374	DDX58;IFIT1
mitochondrial genome maintenance (GO:0000002)	0.0149003	0.406612	10.5374	MPV17;SLC25A4
regulation of neurotransmitter transport (GO:0051588)	0.0149003	0.404449	10.5374	CPLX2;SYN1
semaphorin-plexin signaling pathway involved in neuron projection guidance (GO:1902285)	0.0149003	0.402309	10.5374	PLXNA2;SEMA3F
glomerular visceral epithelial cell differentiation (GO:0072112)	0.0149003	0.400192	10.5374	PODXL;BASP1
defense response to Gram-positive bacterium (GO:0050830)	0.0150151	0.401163	4.21496	FGR;DMBT1;HIST2H2BE;HIST1H2BC
negative regulation of cell adhesion (GO:0007162)	0.0150151	0.399074	4.21496	PODXL;PLXNA2;TBCD;RND1
cellular response to lipid (GO:0071396)	0.0158775	0.419808	2.69355	CXCL10;CARD17;STAP1;PTK2B;FFAR2;CARD16;LILRB2
cellular divalent inorganic cation homeostasis (GO:0072503)	0.0162961	0.428654	3.39075	CCR1;CCL11;CCL8;CCL7;CCL19
regulation of osteoclast differentiation (GO:0045670)	0.0165974	0.434341	5.5535	CCR1;LILRB3;TNF
organic cyclic compound biosynthetic process (GO:1901362)	0.0165974	0.432125	5.5535	GCH1;PYCR2;CYP19A1
regulation of apoptotic process (GO:0042981)	0.0167929	0.434996	1.68081	PSENEN;MOAP1;JUN;PRELID1;PPP1R13B;BCL2A1;SPHK1;SERPINB9;TNF;IFIT3;IFIT2;HCK;TAOK3;MADD;BCL3;TNFSF10;PTK2B;ARHGEF7;EVI2B;BCL2L14
response to lipid (GO:0033993)	0.016988	0.437828	2.93542	CXCL10;JUN;JUND;GCH1;LY96;LGALS9
positive regulation of cell adhesion mediated by integrin (GO:0033630)	0.0172179	0.441522	9.78474	PODXL;PIEZO1
positive regulation of osteoclast differentiation (GO:0045672)	0.0172179	0.439315	9.78474	CCR1;TNF
negative regulation of interleukin-1 beta production (GO:0032691)	0.0172179	0.437129	9.78474	CARD17;CARD16
positive regulation of interleukin-8 secretion (GO:2000484)	0.0172179	0.434965	9.78474	FFAR2;LGALS9
positive regulation of T cell activation (GO:0050870)	0.0174623	0.438967	4.02901	LGALS9;CCL19;LILRB2;SIRPB1
regulation of mast cell degranulation (GO:0043304)	0.0196775	0.492227	9.13242	FGR;LGALS9
positive regulation of stress-activated protein kinase signaling cascade (GO:0070304)	0.0196775	0.489826	9.13242	TAOK3;EIF2AK2
regulation of tumor necrosis factor secretion (GO:1904467)	0.0196775	0.487448	9.13242	DDX58;LGALS9
cellular response to virus (GO:0098586)	0.0196775	0.485093	9.13242	CCL19;LGALS9
positive regulation of acute inflammatory response (GO:0002675)	0.0196775	0.482761	9.13242	FFAR2;TNF
regulation of macrophage chemotaxis (GO:0010758)	0.0196775	0.480451	9.13242	STAP1;PTK2B
positive regulation of cysteine-type endopeptidase activity involved in apoptotic signaling pathway (GO:2001269)	0.0196775	0.478163	9.13242	TNFSF10;LGALS9
regulation of release of cytochrome c from mitochondria (GO:0090199)	0.0204427	0.494403	5.13699	MOAP1;PRELID1;TNFSF10
positive regulation of cytokine biosynthetic process (GO:0042108)	0.0204427	0.492071	5.13699	EGR1;IL27;TNF
positive regulation of macromolecule metabolic process (GO:0010604)	0.0205521	0.492383	2.23347	EGR1;DDX58;LAMP3;STAP1;SERPINB9;LGALS9;ARRB2;PRKAB1;TNF
regulation of GTPase activity (GO:0043087)	0.0207584	0.495	2.55028	CCL11;CCL8;CCL7;CCL4;PLXNA2;CCL19;ARHGEF7
regulation of protein kinase activity (GO:0045859)	0.0210579	0.499806	2.79564	FGR;CEACAM1;PTK2B;LCP2;CCL19;TNF
Rho protein signal transduction (GO:0007266)	0.0210918	0.498294	3.80518	RAC2;WAS;RHOH;RND1
regulation of stress-activated MAPK cascade (GO:0032872)	0.0218239	0.513214	5.01169	PER1;TAOK3;EIF2AK2
positive regulation of inflammatory response (GO:0050729)	0.022066	0.516526	3.75305	GBP5;CCL4;S100A12;S100A8
regulation of protein complex assembly (GO:0043254)	0.022066	0.514168	3.75305	HCK;EIF2AK2;TFIP11;TNF
lipopolysaccharide-mediated signaling pathway (GO:0031663)	0.0222746	0.516669	8.56164	HCK;TNF
dendritic cell chemotaxis (GO:0002407)	0.0222746	0.514331	8.56164	CCR1;CCL19
cellular response to dsRNA (GO:0071359)	0.0222746	0.512014	8.56164	DDX58;IFIT1
leukocyte tethering or rolling (GO:0050901)	0.0222746	0.509718	8.56164	SELL;TNF
neuromuscular process (GO:0050905)	0.0222746	0.507442	8.56164	GCH1;TPP1
leukocyte adhesion to vascular endothelial cell (GO:0061756)	0.0222746	0.505187	8.56164	SELL;TNF
positive regulation of immune system process (GO:0002684)	0.0222746	0.502952	8.56164	LILRB2;LGALS9
T cell migration (GO:0072678)	0.0222746	0.500736	8.56164	CXCL10;CXCL16
positive regulation of GTPase activity (GO:0043547)	0.0229749	0.514215	2.49715	CCL11;CCL8;CCL7;GPR65;CCL4;CCL19;ARHGEF7
positive regulation of defense response (GO:0031349)	0.0230672	0.514026	3.70233	GBP5;CCL4;S100A12;S100A8
regulation of interleukin-6 production (GO:0032675)	0.023255	0.515957	4.89237	DDX58;LILRB2;TNF
positive regulation of interleukin-6 production (GO:0032755)	0.0247358	0.546437	4.77859	DDX58;LGALS9;LILRB2
regulation of multicellular organismal development (GO:2000026)	0.0247358	0.544082	4.77859	CXCL10;PHLDB1;OAS2
positive regulation of interleukin-6 secretion (GO:2000778)	0.0250046	0.547632	8.05802	DDX58;LGALS9
positive regulation of monocyte chemotaxis (GO:0090026)	0.0250046	0.545292	8.05802	CCR1;CXCL10
negative regulation of stress fiber assembly (GO:0051497)	0.0250046	0.542971	8.05802	WAS;PFN1
negative regulation of phosphoprotein phosphatase activity (GO:0032515)	0.0250046	0.540671	8.05802	CRY2;TNF
response to purine-containing compound (GO:0014074)	0.0250046	0.538389	8.05802	JUN;JUND
heterocycle biosynthetic process (GO:0018130)	0.0250046	0.536127	8.05802	GCH1;PYCR2
defense response to fungus (GO:0050832)	0.0250046	0.533884	8.05802	S100A12;S100A8
positive regulation of developmental process (GO:0051094)	0.0251252	0.534225	3.03067	JUN;JUND;LILRB2;ARHGEF7;TNF
positive regulation of JNK cascade (GO:0046330)	0.0251515	0.532564	3.6049	TAOK3;PTK2B;CCL19;TNF
positive regulation of apoptotic signaling pathway (GO:2001235)	0.0251515	0.530364	3.6049	MOAP1;TNFSF10;LGALS9;S100A8
positive regulation of viral life cycle (GO:1903902)	0.0262664	0.551595	4.66999	LGALS9;TRIM38;IFIT1
regulation of T cell activation (GO:0050863)	0.0262664	0.549334	4.66999	PRELID1;IL27;SIRPB1
peptidyl-tyrosine autophosphorylation (GO:0038083)	0.0278467	0.580006	4.56621	FGR;HCK;PTK2B
negative regulation of ossification (GO:0030279)	0.0278467	0.577649	4.56621	CCR1;SRGN;PTK2B
release of cytochrome c from mitochondria (GO:0001836)	0.0278631	0.575649	7.61035	BCL2A1;IFI6
positive regulation of actin cytoskeleton reorganization (GO:2000251)	0.0278631	0.573328	7.61035	HCK;STAP1
response to organophosphorus (GO:0046683)	0.0278631	0.571025	7.61035	JUN;JUND
negative regulation of protein modification by small protein conjugation or removal (GO:1903321)	0.0294765	0.601674	4.46694	ISG15;ARRB2;TRIM21
positive regulation of stress-activated MAPK cascade (GO:0032874)	0.0296509	0.602824	3.42466	TAOK3;PTK2B;EIF2AK2;CCL19
negative regulation of phosphate metabolic process (GO:0045936)	0.0308458	0.624628	7.20981	PLEK;STAP1
regulation of heterotypic cell-cell adhesion (GO:0034114)	0.0308458	0.622159	7.20981	IL1RN;TNF
Rac protein signal transduction (GO:0016601)	0.0308458	0.61971	7.20981	RAC2;RHOH
negative regulation of lipid metabolic process (GO:0045833)	0.0308458	0.61728	7.20981	CEACAM1;TNF
regulation of transcription factor import into nucleus (GO:0042990)	0.0308458	0.614868	7.20981	DDX58;BCL3
leukotriene metabolic process (GO:0006691)	0.0308458	0.612476	7.20981	CYP4F3;ALOX5AP
extrinsic apoptotic signaling pathway in absence of ligand (GO:0097192)	0.0308458	0.610102	7.20981	MOAP1;BCL2A1
regulation of platelet activation (GO:0010543)	0.0308458	0.607746	7.20981	FCER1G;PLEK
innate immune response in mucosa (GO:0002227)	0.0308458	0.605409	7.20981	HIST2H2BE;HIST1H2BC
negative regulation of intracellular signal transduction (GO:1902532)	0.0310737	0.607543	2.55254	PER1;BCL2A1;PIK3IP1;PLEK;RHOH;ARRB2
actin filament organization (GO:0007015)	0.0314631	0.61281	2.85388	RAC2;WAS;RHOH;LCP1;RND1
intrinsic apoptotic signaling pathway in response to DNA damage (GO:0008630)	0.0328841	0.638052	4.28082	MOAP1;BCL2A1;BCL3
pattern recognition receptor signaling pathway (GO:0002221)	0.0328841	0.635635	4.28082	LY96;FFAR2;S100A8
cellular response to mechanical stimulus (GO:0071260)	0.0328841	0.633237	4.28082	CASP5;TNFSF14;PIEZO1
cell projection assembly (GO:0030031)	0.0339486	0.651277	6.84932	RAC2;RHOH
regulation of regulatory T cell differentiation (GO:0045589)	0.0339486	0.648838	6.84932	CR1;LILRB2
negative regulation of actin filament bundle assembly (GO:0032232)	0.0339486	0.646417	6.84932	WAS;PFN1
negative regulation of ion transport (GO:0043271)	0.0339486	0.644014	6.84932	PTK2B;LILRB2
entrainment of circadian clock by photoperiod (GO:0043153)	0.0339486	0.641628	6.84932	PER1;CRY2
cellular calcium ion homeostasis (GO:0006874)	0.0344593	0.648877	2.78427	CCR1;CCL11;CCL8;CCL7;CCL19
antimicrobial humoral immune response mediated by antimicrobial peptide (GO:0061844)	0.0346616	0.650287	4.19346	S100A12;HIST2H2BE;HIST1H2BC
innate immune response activating cell surface receptor signaling pathway (GO:0002220)	0.0354959	0.663501	2.76182	CLEC4A;CLEC4D;FCER1G;FFAR2;CLEC4E
platelet degranulation (GO:0002576)	0.0354959	0.661079	2.76182	SRGN;SERPINA1;PLEK;TUBA4A;F5
positive regulation of programmed cell death (GO:0043068)	0.0355646	0.659949	2.13208	PSENEN;MOAP1;JUN;BCL2A1;TNFSF10;ARHGEF7;TNF;IFIT2
positive regulation of JUN kinase activity (GO:0043507)	0.0364878	0.674628	4.10959	TAOK3;CCL19;TNF
blood circulation (GO:0008015)	0.0364878	0.672193	4.10959	CXCL10;C3AR1;OLR1
receptor internalization (GO:0031623)	0.0364878	0.669775	4.10959	CEACAM1;FCER1G;ARRB2
positive regulation of leukocyte cell-cell adhesion (GO:1903039)	0.0371673	0.679801	6.52316	TNF;SIRPB1
regulation of ruffle assembly (GO:1900027)	0.0371673	0.677373	6.52316	STAP1;PFN1
mitochondrial fission (GO:0000266)	0.0371673	0.674963	6.52316	MX2;MX1
positive regulation of lamellipodium organization (GO:1902745)	0.0371673	0.672569	6.52316	RAC2;ARHGEF7
negative regulation of viral process (GO:0048525)	0.0371673	0.670193	6.52316	IFITM3;TRIM21
photoperiodism (GO:0009648)	0.0371673	0.667833	6.52316	PER1;CRY2
cytoskeleton organization (GO:0007010)	0.0376266	0.673714	2.71798	CCL11;CCL7;MICAL3;ARAP3;PTK2B
peptidyl-tyrosine modification (GO:0018212)	0.0383626	0.684491	4.02901	FGR;HCK;PTK2B
positive regulation of mitochondrion organization (GO:0010822)	0.0398341	0.708269	2.67551	MOAP1;TNFSF10;RAC2;RNASE2;BAP1
T cell activation (GO:0042110)	0.0399938	0.70864	3.11333	TNFSF14;RHOH;LCP1;CCL19
regulation of calcium ion transport (GO:0051924)	0.0402857	0.711342	3.95153	CCR1;CCL4;LILRB2
regulation of natural killer cell mediated cytotoxicity (GO:0042269)	0.0404978	0.712621	6.22665	ARRB2;LGALS9
negative regulation of protein polymerization (GO:0032272)	0.0404978	0.710173	6.22665	TBCD;PFN1
regulation of cytokine production involved in inflammatory response (GO:1900015)	0.0404978	0.70774	6.22665	GBP5;PER1
regulation of monocyte chemotaxis (GO:0090025)	0.0404978	0.705325	6.22665	CCR1;CXCL10
positive regulation of protein kinase activity (GO:0045860)	0.0408237	0.708583	2.3893	EGR1;TAOK3;PTK2B;LCP2;CCL19;TNF
regulation of cytokine-mediated signaling pathway (GO:0001959)	0.0428618	0.741436	3.04414	SPHK1;CDC37;MADD;TNF
positive regulation of response to external stimulus (GO:0032103)	0.0428618	0.738931	3.04414	CCL4;S100A12;CCL19;S100A8
regulation of JNK cascade (GO:0046328)	0.0428618	0.736443	3.04414	PER1;TAOK3;PTK2B;CCL19
regulation of programmed cell death (GO:0043067)	0.0437077	0.748457	2.04457	MOAP1;PRELID1;PPP1R13B;TAOK3;MADD;BCL3;TNF;BCL2L14
regulation of axon extension involved in axon guidance (GO:0048841)	0.0439363	0.749856	5.95593	PLXNA2;SEMA3F
cellular nitrogen compound biosynthetic process (GO:0044271)	0.0439363	0.747356	5.95593	GCH1;SPHK1
negative regulation of signal transduction in absence of ligand (GO:1901099)	0.0439363	0.744873	5.95593	IFI6;TNF
regulation of interleukin-8 secretion (GO:2000482)	0.0439363	0.742407	5.95593	FFAR2;LGALS9
negative regulation of extrinsic apoptotic signaling pathway in absence of ligand (GO:2001240)	0.0439363	0.739957	5.95593	IFI6;TNF
cellular response to amyloid-beta (GO:1904646)	0.0439363	0.737522	5.95593	CASP4;CACNA1A
positive regulation of monooxygenase activity (GO:0032770)	0.0439363	0.735104	5.95593	GCH1;TNF
positive regulation of immune response (GO:0050778)	0.0442753	0.738356	3.80518	GBP5;FFAR2;LGALS9
membrane fusion (GO:0061025)	0.0442753	0.73595	3.80518	BCL2A1;MX2;MX1
phospholipase C-activating G-protein coupled receptor signaling pathway (GO:0007200)	0.0443382	0.734603	3.01069	GPR65;C3AR1;FPR1;GPR84
protein targeting (GO:0006605)	0.0456916	0.754576	2.57493	RTP4;CDC37;TIMM23;ATG4B;TRAK1
positive regulation of cytosolic calcium ion concentration (GO:0007204)	0.0456916	0.752142	2.57493	CCR1;GPR65;C3AR1;FPR1;CACNA1A
positive regulation of MAP kinase activity (GO:0043406)	0.0458288	0.751975	2.3218	TAOK3;MADD;FPR1;S100A12;EIF2AK2;TNF
Ras protein signal transduction (GO:0007265)	0.045841	0.749765	2.15001	RASSF1;JUN;RAC2;RHOH;RALGDS;RAB8A;RND1
Fc-gamma receptor signaling pathway (GO:0038094)	0.0469214	0.764984	2.55571	FGR;HCK;FCER1G;WAS;ACTB
positive regulation of neutrophil chemotaxis (GO:0090023)	0.0474789	0.771607	5.70776	RAC2;CCL19
response to glucocorticoid (GO:0051384)	0.0474789	0.769158	5.70776	IL1RN;TNF
positive regulation of endopeptidase activity (GO:0010950)	0.0474789	0.766724	5.70776	PRELID1;CR1
negative regulation of T cell proliferation (GO:0042130)	0.0474789	0.764305	5.70776	LILRB2;LGALS9
cellular response to organic cyclic compound (GO:0071407)	0.0481708	0.773006	2.53678	EGR1;GNG2;CYP1A1;TNF;ACTB
mitochondrial transport (GO:0006839)	0.0481708	0.770583	2.53678	UCP2;TIMM23;SLC25A44;SLC25A4;ATP5J2
Fc receptor mediated stimulatory signaling pathway (GO:0002431)	0.0481708	0.768174	2.53678	FGR;HCK;FCER1G;WAS;ACTB
regulation of secretion by cell (GO:1903530)	0.0484539	0.770282	3.66928	CPLX2;RAB8A;SYN1
positive regulation of cell death (GO:0010942)	0.0506132	0.802109	3.6049	EGR1;FOS;TNF
I-kappaB kinase/NF-kappaB signaling (GO:0007249)	0.0506132	0.799626	3.6049	BCL3;LY96;TNF
protein import into nucleus, translocation (GO:0000060)	0.0511218	0.805169	5.47945	BCL3;TNF
positive regulation of interleukin-12 production (GO:0032735)	0.0511218	0.802691	5.47945	CCL19;LGALS9
response to amyloid-beta (GO:1904645)	0.0511218	0.800229	5.47945	CASP4;CACNA1A
regulation of lamellipodium assembly (GO:0010591)	0.0511218	0.797782	5.47945	WAS;RAC2
positive regulation of interleukin-1 beta secretion (GO:0050718)	0.0511218	0.79535	5.47945	CCL19;LGALS9
respiratory tube development (GO:0030323)	0.0511218	0.792932	5.47945	DNAAF1;CHI3L1
positive regulation of neutrophil migration (GO:1902624)	0.0511218	0.790529	5.47945	RAC2;CCL19
negative regulation of locomotion (GO:0040013)	0.0511218	0.788141	5.47945	WAS;TRIM21
positive regulation of peptidyl-threonine phosphorylation (GO:0010800)	0.0511218	0.785767	5.47945	SPHK1;CHI3L1
receptor metabolic process (GO:0043112)	0.0528186	0.809409	3.54275	FCER1G;ARRB2;TNF
negative regulation of apoptotic process (GO:0043066)	0.053492	0.817274	1.69468	HCK;PRELID1;BCL2A1;SPHK1;LAMP3;BCL3;IFI6;PTK2B;SERPINB9;CARD16;EVI2B;IFIT3
apoptotic process (GO:0006915)	0.0534986	0.814936	2.07555	TNFSF14;CASP5;CASP4;MX1;PTK2B;BCL2L14;IFIT2
apoptotic cell clearance (GO:0043277)	0.0548615	0.833209	5.2687	RAC2;RHOH
positive regulation of granulocyte chemotaxis (GO:0071624)	0.0548615	0.830736	5.2687	RAC2;CCL19
T cell activation involved in immune response (GO:0002286)	0.0548615	0.828279	5.2687	FCER1G;LCP1
positive regulation of release of cytochrome c from mitochondria (GO:0090200)	0.0548615	0.825835	5.2687	MOAP1;TNFSF10
regulation of insulin secretion (GO:0050796)	0.0554616	0.832414	2.79564	MARCKS;CACNA1A;TNF;SLC25A4
activation of protein kinase activity (GO:0032147)	0.055531	0.831011	2.05773	TAOK3;MADD;FPR1;EIF2AK2;CHI3L1;PTK2B;TNF
small GTPase mediated signal transduction (GO:0007264)	0.0571627	0.852928	2.7674	RASSF1;JUN;RRAD;RALGDS
modulation by host of viral transcription (GO:0043921)	0.0586943	0.873227	5.07357	JUN;CCL4
regulation of extrinsic apoptotic signaling pathway in absence of ligand (GO:2001239)	0.0586943	0.870689	5.07357	IFI6;TNF
extrinsic apoptotic signaling pathway via death domain receptors (GO:0008625)	0.0586943	0.868165	5.07357	MOAP1;TNF
regulation of protein transport (GO:0051223)	0.0586943	0.865656	5.07357	LCP1;TNF
regulation of neurotransmitter secretion (GO:0046928)	0.0586943	0.863161	5.07357	CPLX2;SYN1
cellular response to metal ion (GO:0071248)	0.0588915	0.863573	2.73973	ITPKB;JUN;ALOX5AP;FOS
regulation of tumor necrosis factor production (GO:0032680)	0.0597068	0.87302	3.36852	LY96;LGALS9;CCL19
regulation of protein ubiquitination (GO:0031396)	0.0606481	0.884249	2.7126	SPHK1;PTK2B;ISG15;ARRB2
intrinsic apoptotic signaling pathway (GO:0097193)	0.0606481	0.881729	2.7126	MOAP1;PPP1R13B;BCL2A1;CASP4
negative regulation of peptidase activity (GO:0010466)	0.0620921	0.900159	3.31418	CSTA;SERPINA1;SERPINB9
negative regulation of intracellular steroid hormone receptor signaling pathway (GO:0033144)	0.0626167	0.905192	4.89237	PER1;CRY2
hydrogen ion transmembrane transport (GO:1902600)	0.0626167	0.902635	4.89237	UCP2;ATP5J2
organelle fission (GO:0048285)	0.0626167	0.900093	4.89237	MX2;MX1
regulation of NIK/NF-kappaB signaling (GO:1901222)	0.0626167	0.897564	4.89237	EIF2AK2;TNF
negative regulation of JNK cascade (GO:0046329)	0.0626167	0.89505	4.89237	PER1;TAOK3
dopamine receptor signaling pathway (GO:0007212)	0.0626167	0.89255	4.89237	GNG2;ARRB2
regulation of defense response to virus by virus (GO:0050690)	0.0626167	0.890064	4.89237	HCK;EIF2AK2
regulation of actin polymerization or depolymerization (GO:0008064)	0.0626167	0.887591	4.89237	WAS;PFN1
carbohydrate homeostasis (GO:0033500)	0.0645212	0.912054	3.26158	OAS1;CRY2;FFAR2
regulated exocytosis (GO:0045055)	0.0661935	0.933109	2.31396	SRGN;SERPINA1;PLEK;TUBA4A;F5
transmembrane receptor protein tyrosine kinase signaling pathway (GO:0007169)	0.0662992	0.932024	1.72963	PSENEN;FGR;HCK;CYBB;STAP1;PTK2B;LCP2;PILRA;ARHGEF7;ACTB
cellular response to cadmium ion (GO:0071276)	0.0666253	0.934035	4.72367	JUN;FOS
lung development (GO:0030324)	0.0666253	0.931476	4.72367	DNAAF1;CHI3L1
cortical cytoskeleton organization (GO:0030865)	0.0666253	0.928931	4.72367	PLEK;TNF
regulation of neutrophil chemotaxis (GO:0090022)	0.0666253	0.9264	4.72367	RAC2;CCL19
positive regulation of interleukin-1 secretion (GO:0050716)	0.0666253	0.923883	4.72367	CCL19;LGALS9
regulation of activated T cell proliferation (GO:0046006)	0.0666253	0.921379	4.72367	LGALS9;CLC
semaphorin-plexin signaling pathway (GO:0071526)	0.0666253	0.918889	4.72367	PLXNA2;SEMA3F
cellular response to reactive oxygen species (GO:0034614)	0.0695086	0.956071	3.16122	JUN;MPV17;FOS
negative regulation of stress-activated MAPK cascade (GO:0032873)	0.0707168	0.970074	4.56621	PER1;TAOK3
regulation of defense response to virus by host (GO:0050691)	0.0707168	0.967474	4.56621	DDX58;IFIT1
regulation of leukocyte chemotaxis (GO:0002688)	0.0707168	0.964887	4.56621	CXCL10;PTK2B
regulation of response to external stimulus (GO:0032101)	0.0717619	0.976536	2.56049	HERC5;HCK;CASP5;CASP4
regulation of protein secretion (GO:0050708)	0.0717619	0.973939	2.56049	MARCKS;CACNA1A;TNF;SLC25A4
extrinsic apoptotic signaling pathway (GO:0097191)	0.0746649	1	3.06686	MOAP1;BCL2A1;TNF
negative regulation of cell-cell adhesion (GO:0022408)	0.0748879	1	4.41891	IL1RN;PODXL
anterograde axonal transport (GO:0008089)	0.0748879	1	4.41891	BLOC1S1;TRAK1
response to cadmium ion (GO:0046686)	0.0748879	1	4.41891	JUN;FOS
proton transport (GO:0015992)	0.0748879	1	4.41891	UCP2;ATP5J2
regulation of immune response (GO:0050776)	0.0759752	1	1.91017	FGR;IFITM1;TYROBP;SELL;PILRA;LILRB2;TREM1
negative regulation of cysteine-type endopeptidase activity involved in apoptotic process (GO:0043154)	0.077305	1	3.02176	LAMP3;IFI6;CARD16
regulation of endopeptidase activity (GO:0052548)	0.077305	1	3.02176	PRELID1;SERPINA1;SERPINB9
negative regulation of programmed cell death (GO:0043069)	0.0773707	1	1.67875	HCK;PRELID1;BCL2A1;SPHK1;BCL3;PTK2B;SERPINB9;EVI2B;SLC25A4;IFIT3
positive regulation of establishment of protein localization to mitochondrion (GO:1903749)	0.0776824	1	2.49066	PPP1R13B;RAC2;RNASE2;BAP1
cellular response to peptide hormone stimulus (GO:0071375)	0.0776824	1	2.49066	CEACAM1;GNG2;GNG5;RAB8A
cellular response to glucagon stimulus (GO:0071377)	0.0791354	1	4.28082	GNG2;GNG5
protein trimerization (GO:0070206)	0.0791354	1	4.28082	ALOX5AP;TRIM21
positive regulation of tumor necrosis factor superfamily cytokine production (GO:1903557)	0.0791354	1	4.28082	LY96;CCL19
aminoglycan catabolic process (GO:0006026)	0.0791354	1	4.28082	CHI3L2;CHI3L1
regulation of endocytosis (GO:0030100)	0.0799857	1	2.97796	FGR;HCK;CCL19
regulation of innate immune response (GO:0045088)	0.0799857	1	2.97796	FGR;GBP5;CDC37
positive regulation of plasma membrane bounded cell projection assembly (GO:0120034)	0.0799857	1	2.97796	RAC2;CCL19;PFN1
positive regulation of apoptotic process (GO:0043065)	0.0820299	1	1.78484	PSENEN;MOAP1;JUN;BCL2A1;TNFSF10;ARHGEF7;TNF;IFIT2
vascular endothelial growth factor receptor signaling pathway (GO:0048010)	0.0827063	1	2.93542	CYBB;PTK2B;ACTB
activation of MAPKK activity (GO:0000186)	0.0834563	1	4.1511	TAOK3;EIF2AK2
positive regulation of cytokine-mediated signaling pathway (GO:0001961)	0.0834563	1	4.1511	ZBP1;CASP4
regulation of T cell differentiation (GO:0045580)	0.0834563	1	4.1511	PRELID1;CR1
positive regulation of calcium ion transport (GO:0051928)	0.0834563	1	4.1511	CCR1;CCL4
regulation of cell-substrate adhesion (GO:0010810)	0.0834563	1	4.1511	RAC2;TBCD
response to exogenous dsRNA (GO:0043330)	0.0834563	1	4.1511	DDX58;IFIT1
platelet aggregation (GO:0070527)	0.0834563	1	4.1511	PLEK;ACTB
exonucleolytic nuclear-transcribed mRNA catabolic process involved in deadenylation-dependent decay (GO:0043928)	0.0834563	1	4.1511	EDC4;PATL1
positive regulation of kinase activity (GO:0033674)	0.0838395	1	2.42454	PTK2B;LCP2;CCL19;TNF
negative regulation of membrane potential (GO:0045837)	0.084474	1	11.4155	PRELID1
positive regulation of interferon-gamma secretion (GO:1902715)	0.084474	1	11.4155	LGALS9
granzyme-mediated apoptotic signaling pathway (GO:0008626)	0.084474	1	11.4155	SRGN
immunological synapse formation (GO:0001771)	0.084474	1	11.4155	CCL19
embryonic camera-type eye development (GO:0031076)	0.084474	1	11.4155	NES
regulation of endothelial cell development (GO:1901550)	0.084474	1	11.4155	TNF
regulation of hydrogen peroxide metabolic process (GO:0010310)	0.084474	1	11.4155	RAC2
positive regulation of hormone metabolic process (GO:0032352)	0.084474	1	11.4155	EGR1
determination of liver left/right asymmetry (GO:0071910)	0.084474	1	11.4155	DNAAF1
lipoxin biosynthetic process (GO:2001301)	0.084474	1	11.4155	ALOX5AP
regulation of superoxide metabolic process (GO:0090322)	0.084474	1	11.4155	GCH1
regulation of phagocytosis, engulfment (GO:0060099)	0.084474	1	11.4155	STAP1
heparan sulfate proteoglycan biosynthetic process, polysaccharide chain biosynthetic process (GO:0015014)	0.084474	1	11.4155	NDST1
negative regulation of necroptotic process (GO:0060546)	0.084474	1	11.4155	SLC25A4
snRNA modification (GO:0040031)	0.084474	1	11.4155	NOP10
cellular response to monoamine stimulus (GO:0071868)	0.084474	1	11.4155	GNG2
negative regulation of lymphocyte migration (GO:2000402)	0.084474	1	11.4155	PADI2
positive regulation of fibroblast migration (GO:0010763)	0.084474	1	11.4155	ARHGEF7
rRNA transport (GO:0051029)	0.084474	1	11.4155	RPSA
regulation of skeletal muscle contraction (GO:0014819)	0.084474	1	11.4155	KCNJ2
negative regulation of digestive system process (GO:0060457)	0.084474	1	11.4155	HAMP
glomerular epithelial cell differentiation (GO:0072311)	0.084474	1	11.4155	BASP1
negative regulation of phospholipid metabolic process (GO:1903726)	0.084474	1	11.4155	PIK3IP1
renal filtration cell differentiation (GO:0061318)	0.084474	1	11.4155	BASP1
platelet dense granule organization (GO:0060155)	0.084474	1	11.4155	BLOC1S1
positive regulation of granulocyte differentiation (GO:0030854)	0.084474	1	11.4155	EVI2B
immune response-inhibiting cell surface receptor signaling pathway (GO:0002767)	0.084474	0.99785	11.4155	LILRB2
regulation of cellular response to oxidative stress (GO:1900407)	0.084474	0.995545	11.4155	GCH1
negative regulation of complement activation (GO:0045916)	0.084474	0.993251	11.4155	CR1
regulation of blood vessel remodeling (GO:0060312)	0.084474	0.990968	11.4155	CEACAM1
deadenylation-independent decapping of nuclear-transcribed mRNA (GO:0031087)	0.084474	0.988695	11.4155	EDC4
lipid hydroxylation (GO:0002933)	0.084474	0.986433	11.4155	CYP1A1
regulation of chemokine-mediated signaling pathway (GO:0070099)	0.084474	0.98418	11.4155	PADI2
regulation of interleukin-12 secretion (GO:2001182)	0.084474	0.981939	11.4155	LGALS9
regulation of interferon-alpha secretion (GO:1902739)	0.084474	0.979707	11.4155	DDX58
response to heparin (GO:0071503)	0.084474	0.977485	11.4155	EGR1
protein insertion into mitochondrial membrane involved in apoptotic signaling pathway (GO:0001844)	0.084474	0.975274	11.4155	MOAP1
positive regulation of microglial cell activation (GO:1903980)	0.084474	0.973072	11.4155	STAP1
regulation of interleukin-10 secretion (GO:2001179)	0.084474	0.970881	11.4155	LGALS9
positive regulation of phospholipid transport (GO:2001140)	0.084474	0.968699	11.4155	PRELID1
positive regulation of interferon-alpha secretion (GO:1902741)	0.084474	0.966527	11.4155	DDX58
positive regulation of antigen processing and presentation (GO:0002579)	0.084474	0.964365	11.4155	CCL19
regulation of dendritic cell chemotaxis (GO:2000508)	0.084474	0.962212	11.4155	LGALS9
epithelial tube formation (GO:0072175)	0.084474	0.960069	11.4155	PODXL
monoubiquitinated protein deubiquitination (GO:0035520)	0.084474	0.957936	11.4155	BAP1
positive regulation of fever generation (GO:0031622)	0.084474	0.955812	11.4155	TNF
response to catecholamine (GO:0071869)	0.084474	0.953697	11.4155	GNG2
positive regulation of dendritic cell antigen processing and presentation (GO:0002606)	0.084474	0.951592	11.4155	CCL19
regulation of interleukin-13 secretion (GO:2000665)	0.084474	0.949496	11.4155	LGALS9
regulation of NFAT protein import into nucleus (GO:0051532)	0.084474	0.947409	11.4155	TNF
neuron remodeling (GO:0016322)	0.084474	0.945331	11.4155	RND1
positive regulation of lymphocyte proliferation (GO:0050671)	0.0854664	0.954344	2.89408	CCL19;LILRB2;TNFSF13B
positive regulation of growth (GO:0045927)	0.0854664	0.95226	2.89408	SPHK1;S100A8;CXCL16
regulation of immune effector process (GO:0002697)	0.0859436	0.955491	2.40327	HERC5;CR1;C3AR1;C1QC
regulation of interleukin-8 production (GO:0032677)	0.0878475	0.974535	4.02901	DDX58;TNF
positive regulation of leukocyte migration (GO:0002687)	0.0878475	0.972421	4.02901	CXCL10;TNF
regulation of JUN kinase activity (GO:0043506)	0.0878475	0.970316	4.02901	TAOK3;TNF
negative regulation of T cell activation (GO:0050868)	0.0878475	0.96822	4.02901	CEACAM1;LILRB2
response to glucagon (GO:0033762)	0.0878475	0.966133	4.02901	GNG2;GNG5
negative regulation of cysteine-type endopeptidase activity (GO:2000117)	0.0882653	0.968641	2.85388	LAMP3;IFI6;CARD16
chromatin remodeling (GO:0006338)	0.0902284	0.988059	2.36183	SP110;SP140;PADI2;ACTB
regulation of cyclin-dependent protein kinase activity (GO:1904029)	0.0923061	1	3.91389	HERC5;CDC37
nuclear-transcribed mRNA catabolic process, exonucleolytic (GO:0000291)	0.0923061	1	3.91389	EDC4;PATL1
actin filament bundle organization (GO:0061572)	0.0923061	1	3.91389	LCP1;RND1
activation of MAPK activity (GO:0000187)	0.0924087	1	2.34165	MADD;FPR1;CCL19;TNF
glucose homeostasis (GO:0042593)	0.0939772	1	2.77675	OAS1;CRY2;FFAR2
actin polymerization or depolymerization (GO:0008154)	0.0968291	1	3.80518	WAS;MICAL3
regulation of receptor-mediated endocytosis (GO:0048259)	0.0968291	1	3.80518	ARAP3;CCL19
histone deacetylation (GO:0016575)	0.0968291	1	3.80518	PER1;MIER1
axonal transport (GO:0098930)	0.0968291	1	3.80518	BLOC1S1;TRAK1
adherens junction assembly (GO:0034333)	0.0978447	1	9.78474	TBCD
regulation of hormone biosynthetic process (GO:0046885)	0.0978447	1	9.78474	EGR1
regulation of myosin-light-chain-phosphatase activity (GO:0035507)	0.0978447	1	9.78474	TNF
positive regulation of lamellipodium morphogenesis (GO:2000394)	0.0978447	1	9.78474	ARHGEF7
regulation of chromatin assembly or disassembly (GO:0001672)	0.0978447	1	9.78474	PADI2
positive regulation of sphingolipid biosynthetic process (GO:0090154)	0.0978447	1	9.78474	TNF
regulation of monocyte chemotactic protein-1 production (GO:0071637)	0.0978447	1	9.78474	LGALS9
rRNA-containing ribonucleoprotein complex export from nucleus (GO:0071428)	0.0978447	1	9.78474	RPSA
negative regulation of MyD88-independent toll-like receptor signaling pathway (GO:0034128)	0.0978447	1	9.78474	LY96
positive regulation of dendritic cell chemotaxis (GO:2000510)	0.0978447	1	9.78474	LGALS9
positive regulation of mast cell degranulation (GO:0043306)	0.0978447	1	9.78474	FGR
pri-miRNA transcription from RNA polymerase II promoter (GO:0061614)	0.0978447	1	9.78474	SPI1
death-inducing signaling complex assembly (GO:0071550)	0.0978447	1	9.78474	TNF
left/right pattern formation (GO:0060972)	0.0978447	1	9.78474	DNAAF1
pteridine-containing compound biosynthetic process (GO:0042559)	0.0978447	1	9.78474	GCH1
negative regulation of osteoblast proliferation (GO:0033689)	0.0978447	1	9.78474	EIF2AK2
activation of MAPKKK activity (GO:0000185)	0.0978447	1	9.78474	TNF
regulation of response to biotic stimulus (GO:0002831)	0.0978447	1	9.78474	HERC5
chromatin-mediated maintenance of transcription (GO:0048096)	0.0978447	1	9.78474	PADI2
determination of digestive tract left/right asymmetry (GO:0071907)	0.0978447	1	9.78474	DNAAF1
adenine nucleotide transport (GO:0051503)	0.0978447	1	9.78474	SLC25A4
pituitary gland development (GO:0021983)	0.0978447	1	9.78474	HESX1
positive regulation of lymphocyte apoptotic process (GO:0070230)	0.0978447	1	9.78474	PRELID1
negative regulation of nitrogen compound metabolic process (GO:0051172)	0.0978447	1	9.78474	LILRB2
regulation of vitamin D biosynthetic process (GO:0060556)	0.0978447	0.998603	9.78474	TNF
regulation by virus of viral protein levels in host cell (GO:0046719)	0.0978447	0.99661	9.78474	IFIT1
negative regulation of T cell mediated immunity (GO:0002710)	0.0978447	0.994625	9.78474	CEACAM1
positive regulation of tumor necrosis factor-mediated signaling pathway (GO:1903265)	0.0978447	0.992647	9.78474	CASP4
protection from non-homologous end joining at telomere (GO:0031848)	0.0978447	0.990678	9.78474	TFIP11
purine ribonucleotide transport (GO:0015868)	0.0978447	0.988716	9.78474	SLC25A4
endonucleolytic cleavage in ITS1 to separate SSU-rRNA from 5.8S rRNA and LSU-rRNA from tricistronic rRNA transcript (SSU-rRNA, 5.8S rRNA, LSU-rRNA) (GO:0000447)	0.0978447	0.986762	9.78474	RPSA
negative regulation of dendritic cell apoptotic process (GO:2000669)	0.0978447	0.984816	9.78474	CCL19
positive regulation of ceramide biosynthetic process (GO:2000304)	0.0978447	0.982877	9.78474	TNF
adenylate cyclase-activating dopamine receptor signaling pathway (GO:0007191)	0.0978447	0.980946	9.78474	GNG2
proline metabolic process (GO:0006560)	0.0978447	0.979023	9.78474	PYCR2
copper ion import (GO:0015677)	0.0978447	0.977107	9.78474	ATP7B
regulation of calcidiol 1-monooxygenase activity (GO:0060558)	0.0978447	0.975198	9.78474	TNF
regulation of protein deubiquitination (GO:0090085)	0.0978447	0.973297	9.78474	TRIM21
regulation of cell projection organization (GO:0031344)	0.0978447	0.971404	9.78474	CCL19
regulation of microglial cell activation (GO:1903978)	0.0978447	0.969518	9.78474	STAP1
positive regulation of type I interferon-mediated signaling pathway (GO:0060340)	0.0978447	0.967639	9.78474	ZBP1
negative regulation of necrotic cell death (GO:0060547)	0.0978447	0.965767	9.78474	SLC25A4
marginal zone B cell differentiation (GO:0002315)	0.0978447	0.963903	9.78474	PTK2B
positive regulation of CD4-positive, alpha-beta T cell activation (GO:2000516)	0.0978447	0.962045	9.78474	LGALS9
transforming growth factor beta receptor signaling pathway (GO:0007179)	0.099837	0.979747	2.70368	JUN;ARRB2;FOS
negative regulation of extrinsic apoptotic signaling pathway (GO:2001237)	0.099837	0.977866	2.70368	TNFSF10;IFI6;TNF
regulation of acute inflammatory response (GO:0002673)	0.101377	0.99105	2.26424	CR1;C3AR1;FFAR2;C1QC
stimulatory C-type lectin receptor signaling pathway (GO:0002223)	0.101377	0.989155	2.26424	CLEC4A;CLEC4D;FCER1G;CLEC4E
Golgi organization (GO:0007030)	0.101377	0.987267	2.26424	GAK;PI4K2B;PLEKHM2;ARHGEF7
regulation of cell differentiation (GO:0045595)	0.101377	0.985387	2.26424	PHLDB1;JUN;JUND;EIF2AK2
positive regulation of smooth muscle cell proliferation (GO:0048661)	0.101414	0.983868	3.70233	JUN;TNF
regulation of peptidyl-threonine phosphorylation (GO:0010799)	0.101414	0.982001	3.70233	SPHK1;CHI3L1
positive regulation of stress fiber assembly (GO:0051496)	0.101414	0.980141	3.70233	ARHGEF15;GPR65
negative regulation of Ras protein signal transduction (GO:0046580)	0.101414	0.978288	3.70233	RASA3;ARAP3
actin filament bundle assembly (GO:0051017)	0.101414	0.976442	3.70233	LCP1;RND1
tumor necrosis factor-mediated signaling pathway (GO:0033209)	0.106007	1	2.22742	TNFSF14;PTK2B;TNF;TNFSF13B
T cell differentiation (GO:0030217)	0.106057	1	3.6049	FCER1G;RHOH
positive regulation of neuron death (GO:1901216)	0.106057	1	3.6049	EGR1;FOS
membrane depolarization during action potential (GO:0086010)	0.106057	1	3.6049	CACNA1A;KCNJ2
homotypic cell-cell adhesion (GO:0034109)	0.106057	1	3.6049	PLEK;ACTB
positive regulation of innate immune response (GO:0045089)	0.106057	1	3.6049	ZBP1;GBP5
organic anion transport (GO:0015711)	0.108357	1	2.20946	PRELID1;CA1;SLC26A8;SLC25A4
negative regulation of macromolecule metabolic process (GO:0010605)	0.108357	1	2.20946	CCR1;LGALS9;LILRB2;TNF
peptidyl-tyrosine phosphorylation (GO:0018108)	0.108893	1	2.60101	FGR;HCK;PTK2B
signal transduction by p53 class mediator (GO:0072331)	0.110757	1	3.51247	PPP1R13B;BCL3
regulation of extrinsic apoptotic signaling pathway via death domain receptors (GO:1902041)	0.110757	1	3.51247	MADD;TNFSF10
regulation of type I interferon-mediated signaling pathway (GO:0060338)	0.110757	1	3.51247	ZBP1;CDC37
regulation of plasma membrane bounded cell projection assembly (GO:0120032)	0.110757	1	3.51247	PODXL;WAS
protein insertion into mitochondrial membrane (GO:0051204)	0.111021	1	8.56164	MOAP1
peptidyl-cysteine modification (GO:0018198)	0.111021	1	8.56164	S100A8
Golgi to lysosome transport (GO:0090160)	0.111021	1	8.56164	GAK
neuron projection extension involved in neuron projection guidance (GO:1902284)	0.111021	1	8.56164	SEMA3F
positive regulation of extracellular matrix assembly (GO:1901203)	0.111021	1	8.56164	PHLDB1
cell migration involved in heart development (GO:0060973)	0.111021	1	8.56164	DCHS1
mast cell activation involved in immune response (GO:0002279)	0.111021	1	8.56164	S100A13
cellular response to prostaglandin E stimulus (GO:0071380)	0.111021	1	8.56164	GNG2
negative regulation of interleukin-1 production (GO:0032692)	0.111021	1	8.56164	CEACAM1
cellular response to interleukin-21 (GO:0098757)	0.111021	1	8.56164	IL2RG
glomerular visceral epithelial cell development (GO:0072015)	0.111021	1	8.56164	PODXL
negative regulation of platelet aggregation (GO:0090331)	0.111021	1	8.56164	CEACAM1
positive regulation of interleukin-8 biosynthetic process (GO:0045416)	0.111021	1	8.56164	TNF
regulation of histone H4 acetylation (GO:0090239)	0.111021	1	8.56164	SPI1
positive regulation of steroid biosynthetic process (GO:0010893)	0.111021	1	8.56164	TNF
positive regulation of transforming growth factor beta production (GO:0071636)	0.111021	1	8.56164	LGALS9
negative regulation of activated T cell proliferation (GO:0046007)	0.111021	1	8.56164	LGALS9
nuclear-transcribed mRNA catabolic process, deadenylation-independent decay (GO:0031086)	0.111021	1	8.56164	EDC4
interleukin-21-mediated signaling pathway (GO:0038114)	0.111021	1	8.56164	IL2RG
negative regulation of protein complex disassembly (GO:0043242)	0.111021	1	8.56164	TNF
regulation of MyD88-independent toll-like receptor signaling pathway (GO:0034127)	0.111021	1	8.56164	LY96
axon extension involved in axon guidance (GO:0048846)	0.111021	1	8.56164	SEMA3F
positive regulation of cAMP-mediated signaling (GO:0043950)	0.111021	1	8.56164	CXCL10
desensitization of G-protein coupled receptor protein signaling pathway (GO:0002029)	0.111021	0.999187	8.56164	ARRB2
insulin metabolic process (GO:1901142)	0.111021	0.997428	8.56164	CEACAM1
estrogen biosynthetic process (GO:0006703)	0.111021	0.995675	8.56164	CYP19A1
deadenylation-dependent decapping of nuclear-transcribed mRNA (GO:0000290)	0.111021	0.993928	8.56164	PATL1
positive regulation of protein localization to cell surface (GO:2000010)	0.111021	0.992187	8.56164	TNF
positive regulation of metanephros development (GO:0072216)	0.111021	0.990453	8.56164	BASP1
negative regulation of biosynthetic process (GO:0009890)	0.111021	0.988724	8.56164	CEACAM1
diol biosynthetic process (GO:0034312)	0.111021	0.987002	8.56164	SPHK1
amyloid precursor protein catabolic process (GO:0042987)	0.111021	0.985285	8.56164	PSENEN
B cell mediated immunity (GO:0019724)	0.111021	0.983575	8.56164	FCER1G
sphingosine biosynthetic process (GO:0046512)	0.111021	0.98187	8.56164	SPHK1
positive regulation of regulatory T cell differentiation (GO:0045591)	0.111021	0.980171	8.56164	LILRB2
positive regulation of vasculogenesis (GO:2001214)	0.111021	0.978478	8.56164	CEACAM1
rRNA pseudouridine synthesis (GO:0031118)	0.111021	0.976791	8.56164	NOP10
glomerular epithelial cell development (GO:0072310)	0.111021	0.97511	8.56164	PODXL
actin filament network formation (GO:0051639)	0.111021	0.973435	8.56164	LCP1
mast cell degranulation (GO:0043303)	0.111021	0.971765	8.56164	S100A13
negative regulation of vascular permeability (GO:0043116)	0.111021	0.970101	8.56164	CEACAM1
regulation of dendritic cell antigen processing and presentation (GO:0002604)	0.111021	0.968443	8.56164	CCL19
regulation of cilium movement (GO:0003352)	0.111021	0.96679	8.56164	DNAAF1
positive regulation of chromatin silencing (GO:0031937)	0.111021	0.965143	8.56164	MIER1
regulation of long term synaptic depression (GO:1900452)	0.111021	0.963502	8.56164	LILRB2
peptidyl-lysine acetylation (GO:0018394)	0.111021	0.961866	8.56164	BLOC1S1
interleukin-1 beta secretion (GO:0050702)	0.111021	0.960236	8.56164	GBP5
DNA cytosine deamination (GO:0070383)	0.111021	0.958611	8.56164	APOBEC3A
kidney mesenchyme development (GO:0072074)	0.111021	0.956992	8.56164	BASP1
regulation of phosphatidylinositol 3-kinase signaling (GO:0014066)	0.111981	0.963639	2.56849	FGR;CEACAM1;PIK3IP1
protein autophosphorylation (GO:0046777)	0.113934	0.978794	1.95695	FGR;HCK;TAOK3;EIF2AK2;PTK2B
positive regulation of protein targeting to mitochondrion (GO:1903955)	0.115101	0.987164	2.53678	RAC2;RNASE2;BAP1
regulation of cellular localization (GO:0060341)	0.115511	0.989011	3.42466	CPLX2;SYN1
regulation of protein dephosphorylation (GO:0035304)	0.115511	0.987354	3.42466	PPP1R14B;LILRB2
response to cAMP (GO:0051591)	0.115511	0.985703	3.42466	JUN;JUND
negative regulation of cytokine secretion (GO:0050710)	0.115511	0.984057	3.42466	SRGN;TNF
regulation of intracellular transport (GO:0032386)	0.115511	0.982417	3.42466	MX2;LCP1
regulation of viral transcription (GO:0046782)	0.115511	0.980783	3.42466	IFITM3;TRIM21
positive regulation of cell cycle (GO:0045787)	0.118255	1	2.50585	SPHK1;EVI2B;TRIM21
ephrin receptor signaling pathway (GO:0048013)	0.118255	1	2.50585	PSENEN;ARHGEF7;ACTB
bicarbonate transport (GO:0015701)	0.120315	1	3.34113	CA1;SLC26A8
regulation of calcium-mediated signaling (GO:0050848)	0.120315	1	3.34113	PLEK;CCL4
calcium-dependent cell-cell adhesion via plasma membrane cell adhesion molecules (GO:0016339)	0.120315	1	3.34113	SELL;DCHS1
positive regulation of receptor-mediated endocytosis (GO:0048260)	0.120315	1	3.34113	ARRB2;CCL19
cellular response to peptide (GO:1901653)	0.120315	1	3.34113	CASP4;CACNA1A
negative regulation of proteolysis (GO:0045861)	0.120315	1	3.34113	CSTA;TRIM21
negative regulation of endopeptidase activity (GO:0010951)	0.12144	1	2.47566	SERPINA1;CR1;SERPINB9
negative regulation of circadian rhythm (GO:0042754)	0.124005	1	7.61035	CRY2
negative regulation of serine-type endopeptidase activity (GO:1900004)	0.124005	1	7.61035	CR1
positive regulation of production of molecular mediator of immune response (GO:0002702)	0.124005	1	7.61035	FFAR2
actin crosslink formation (GO:0051764)	0.124005	1	7.61035	LCP1
neuron maturation (GO:0042551)	0.124005	1	7.61035	RND1
regulation of T-helper 1 type immune response (GO:0002825)	0.124005	1	7.61035	IL27
regulation of interferon-gamma secretion (GO:1902713)	0.124005	1	7.61035	LGALS9
regulation of endothelial cell differentiation (GO:0045601)	0.124005	1	7.61035	CEACAM1
mature B cell differentiation involved in immune response (GO:0002313)	0.124005	1	7.61035	PTK2B
regulation of morphogenesis of an epithelium (GO:1905330)	0.124005	1	7.61035	CXCL10
regulation of cysteine-type endopeptidase activity involved in apoptotic signaling pathway (GO:2001267)	0.124005	1	7.61035	LGALS9
ionotropic glutamate receptor signaling pathway (GO:0035235)	0.124005	1	7.61035	PTK2B
Cdc42 protein signal transduction (GO:0032488)	0.124005	1	7.61035	WAS
interleukin-1 beta production (GO:0032611)	0.124005	1	7.61035	GBP5
positive regulation of leukocyte apoptotic process (GO:2000108)	0.124005	1	7.61035	LGALS9
sphingoid biosynthetic process (GO:0046520)	0.124005	1	7.61035	SPHK1
semaphorin-plexin signaling pathway involved in axon guidance (GO:1902287)	0.124005	1	7.61035	PLXNA2
epithelial cilium movement involved in determination of left/right asymmetry (GO:0060287)	0.124005	1	7.61035	DNAAF1
negative regulation of phosphatidylinositol 3-kinase signaling (GO:0014067)	0.124005	1	7.61035	PIK3IP1
sympathetic ganglion development (GO:0061549)	0.124005	1	7.61035	SEMA3F
regulation of cytokine secretion involved in immune response (GO:0002739)	0.124005	1	7.61035	TNF
podosome assembly (GO:0071800)	0.124005	1	7.61035	BIN2
myeloid leukocyte mediated immunity (GO:0002444)	0.124005	0.99968	7.61035	SERPINB9
negative regulation of alcohol biosynthetic process (GO:1902931)	0.124005	0.998104	7.61035	PLEK
regulation of sequestering of calcium ion (GO:0051282)	0.124005	0.996532	7.61035	PTK2B
omega-hydroxylase P450 pathway (GO:0097267)	0.124005	0.994965	7.61035	CYP1A1
positive regulation of cell activation (GO:0050867)	0.124005	0.993403	7.61035	PLEK
negative regulation of heterotypic cell-cell adhesion (GO:0034115)	0.124005	0.991846	7.61035	IL1RN
regulation of cell-cell adhesion involved in gastrulation (GO:0070587)	0.124005	0.990294	7.61035	IL1RN
positive regulation of myeloid leukocyte mediated immunity (GO:0002888)	0.124005	0.988746	7.61035	FGR
regulation of hair cycle (GO:0042634)	0.124005	0.987204	7.61035	PER1
positive regulation of cytokine production involved in inflammatory response (GO:1900017)	0.124005	0.985666	7.61035	GBP5
B cell homeostasis (GO:0001782)	0.124005	0.984133	7.61035	GAPT
negative regulation of lipid localization (GO:1905953)	0.124005	0.982605	7.61035	TNF
regulation of helicase activity (GO:0051095)	0.124005	0.981082	7.61035	IFIT1
mitral valve morphogenesis (GO:0003183)	0.124005	0.979563	7.61035	DCHS1
axonal transport of mitochondrion (GO:0019896)	0.124005	0.978049	7.61035	TRAK1
negative regulation of microtubule polymerization (GO:0031115)	0.124005	0.97654	7.61035	TBCD
negative regulation of serine-type peptidase activity (GO:1902572)	0.124005	0.975035	7.61035	CR1
sphingosine metabolic process (GO:0006670)	0.124005	0.973535	7.61035	SPHK1
regulation of glycoprotein biosynthetic process (GO:0010559)	0.124005	0.97204	7.61035	CCL19
cellular response to calcium ion (GO:0071277)	0.125168	0.979651	3.26158	ITPKB;ALOX5AP
translesion synthesis (GO:0019985)	0.125168	0.97815	3.26158	UBE2L6;ISG15
positive regulation of interferon-gamma production (GO:0032729)	0.130067	1	3.18573	IL27;LGALS9
intrinsic apoptotic signaling pathway by p53 class mediator (GO:0072332)	0.130067	1	3.18573	PPP1R13B;BCL3
histone H3 acetylation (GO:0043966)	0.130067	1	3.18573	PER1;SPI1
digestive tract development (GO:0048565)	0.130067	1	3.18573	DNAAF1;TNF
regulation of interferon-gamma production (GO:0032649)	0.130067	1	3.18573	ISG15;LGALS9
cellular response to organic substance (GO:0071310)	0.130532	1	2.05994	JUN;JUND;CYP1A1;TNF
Fc-gamma receptor signaling pathway involved in phagocytosis (GO:0038096)	0.130532	1	2.05994	FGR;HCK;WAS;ACTB
positive regulation of cellular component biogenesis (GO:0044089)	0.134486	1	2.36183	PLEK;PFN1;TNF
positive regulation of transport (GO:0051050)	0.13501	1	3.11333	CCL19;TNF
posttranscriptional regulation of gene expression (GO:0010608)	0.13501	1	3.11333	PER1;ZC3H7A
proteolysis (GO:0006508)	0.135127	1	1.6476	PSENEN;SRGN;TPSB2;OLR1;ATG4B;TPP1;MMP8
regulation of synapse maturation (GO:0090128)	0.1368	1	6.84932	ARHGEF15
ganglion development (GO:0061548)	0.1368	1	6.84932	SEMA3F
regulation of cellular respiration (GO:0043457)	0.1368	1	6.84932	PRELID1
superoxide anion generation (GO:0042554)	0.1368	1	6.84932	CYBB
regulation of actin filament length (GO:0030832)	0.1368	1	6.84932	WAS
oxalate transport (GO:0019532)	0.1368	1	6.84932	SLC26A8
positive regulation of alcohol biosynthetic process (GO:1902932)	0.1368	1	6.84932	TNF
response to acidic pH (GO:0010447)	0.1368	1	6.84932	GPR65
regulation of respiratory burst (GO:0060263)	0.1368	1	6.84932	RAC2
mesenchymal to epithelial transition (GO:0060231)	0.1368	1	6.84932	BASP1
cellular copper ion homeostasis (GO:0006878)	0.1368	1	6.84932	ATP7B
regulation of DNA-templated transcription, initiation (GO:2000142)	0.1368	1	6.84932	JUN
regulation of transforming growth factor beta production (GO:0071634)	0.1368	1	6.84932	LGALS9
telomere maintenance in response to DNA damage (GO:0043247)	0.1368	1	6.84932	TFIP11
actin filament depolymerization (GO:0030042)	0.1368	1	6.84932	MICAL3
regulation of natural killer cell mediated cytotoxicity directed against tumor cell target (GO:0002858)	0.1368	1	6.84932	CEACAM1
motor neuron axon guidance (GO:0008045)	0.1368	1	6.84932	PLXNA2
negative regulation of lipopolysaccharide-mediated signaling pathway (GO:0031665)	0.1368	1	6.84932	CARD16
detection of bacterium (GO:0016045)	0.1368	1	6.84932	DMBT1
negative regulation of transcription from RNA polymerase II promoter in response to stress (GO:0097201)	0.1368	1	6.84932	JUN
regulation of mitochondrial depolarization (GO:0051900)	0.1368	1	6.84932	IFI6
positive regulation of interleukin-13 production (GO:0032736)	0.1368	1	6.84932	LGALS9
protein kinase A signaling (GO:0010737)	0.1368	1	6.84932	LCP1
T cell homeostasis (GO:0043029)	0.1368	1	6.84932	TNFSF14
negative regulation of homotypic cell-cell adhesion (GO:0034111)	0.1368	1	6.84932	CEACAM1
regulation of T cell apoptotic process (GO:0070232)	0.1368	1	6.84932	PRELID1
regulation of T cell chemotaxis (GO:0010819)	0.1368	1	6.84932	CXCL10
divalent metal ion transport (GO:0070838)	0.137822	1	2.33499	CCR1;CCL8;CACNA1A
regulation of protein targeting to mitochondrion (GO:1903214)	0.137822	1	2.33499	RAC2;RNASE2;BAP1
regulation of cytosolic calcium ion concentration (GO:0051480)	0.140946	1	1.9998	CCR1;C3AR1;FPR1;CACNA1A
receptor-mediated endocytosis (GO:0006898)	0.141506	1	1.82163	LMBR1L;GAK;FCER1G;ARRB2;CXCL16
protein complex assembly (GO:0006461)	0.143739	1	1.81199	TLE4;SERPINA1;BIN2;TNF;F5
regulation of Ras protein signal transduction (GO:0046578)	0.144575	1	2.28311	RASA3;MADD;ARAP3
interleukin-12-mediated signaling pathway (GO:0035722)	0.145018	1	2.97796	CA1;LCP1
cellular response to interleukin-12 (GO:0071349)	0.145018	1	2.97796	CA1;LCP1
positive regulation of ion transport (GO:0043270)	0.145018	1	2.97796	CCR1;CCL4
icosanoid metabolic process (GO:0006690)	0.145018	1	2.97796	CYP4F3;ALOX5AP
aminoglycan biosynthetic process (GO:0006023)	0.145018	1	2.97796	NDST1;HS3ST3A1
protein homooligomerization (GO:0051260)	0.145987	1	1.80245	GBP5;FCER1G;GCH1;ALOX5AP;KCNJ2
cellular protein modification process (GO:0006464)	0.147059	1	1.30007	CSTA;SERPINA1;CCL11;FBXW5;EIF2AK2;DAPP1;UBE2L6;ISG15;PRKAB1;F5;HERC5;FGR;HCK;TAOK3;ATG4B;PTK2B;ARSE;BAP1;RAB8A
cellular response to acid chemical (GO:0071229)	0.147992	1	2.25802	EGR1;PTK2B;FFAR2
regulation of small GTPase mediated signal transduction (GO:0051056)	0.148967	1	1.95695	RAC2;RHOH;ARAP3;ARHGEF7
sulfate transmembrane transport (GO:1902358)	0.149409	1	6.22665	SLC26A8
negative regulation of morphogenesis of an epithelium (GO:1905331)	0.149409	1	6.22665	TNF
negative regulation of defense response to virus (GO:0050687)	0.149409	1	6.22665	IFIT1
interleukin-27-mediated signaling pathway (GO:0070106)	0.149409	1	6.22665	IL27
nitric oxide biosynthetic process (GO:0006809)	0.149409	1	6.22665	GCH1
cellular response to prostaglandin stimulus (GO:0071379)	0.149409	1	6.22665	GNG2
regulation of lamellipodium morphogenesis (GO:2000392)	0.149409	1	6.22665	ARHGEF7
positive regulation of leukocyte degranulation (GO:0043302)	0.149409	1	6.22665	FGR
negative regulation of fatty acid biosynthetic process (GO:0045717)	0.149409	1	6.22665	CEACAM1
endonucleolytic cleavage of tricistronic rRNA transcript (SSU-rRNA, 5.8S rRNA, LSU-rRNA) (GO:0000479)	0.149409	1	6.22665	RPSA
regulation of actin filament depolymerization (GO:0030834)	0.149409	1	6.22665	PLEK
activation of cysteine-type endopeptidase activity involved in apoptotic signaling pathway (GO:0097296)	0.149409	1	6.22665	TNFSF10
myeloid cell activation involved in immune response (GO:0002275)	0.149409	1	6.22665	FCER1G
relaxation of cardiac muscle (GO:0055119)	0.149409	1	6.22665	KCNJ2
positive regulation of myoblast fusion (GO:1901741)	0.149409	1	6.22665	CD53
regulation of hemopoiesis (GO:1903706)	0.149409	1	6.22665	EIF2AK2
mitochondrion distribution (GO:0048311)	0.149409	1	6.22665	TRAK1
T cell proliferation (GO:0042098)	0.149409	1	6.22665	TNFSF14
positive regulation of actin filament depolymerization (GO:0030836)	0.149409	1	6.22665	PLEK
regulation of ceramide biosynthetic process (GO:2000303)	0.149409	1	6.22665	TNF
sphingolipid catabolic process (GO:0030149)	0.149409	1	6.22665	SPHK1
cytidine to uridine editing (GO:0016554)	0.149409	1	6.22665	APOBEC3A
positive regulation of glycoprotein biosynthetic process (GO:0010560)	0.149409	1	6.22665	CCL19
negative regulation of histone acetylation (GO:0035067)	0.149409	1	6.22665	SPI1
relaxation of muscle (GO:0090075)	0.149409	1	6.22665	KCNJ2
cytoplasmic mRNA processing body assembly (GO:0033962)	0.149409	1	6.22665	PATL1
icosanoid biosynthetic process (GO:0046456)	0.149409	1	6.22665	ALOX5AP
protein kinase C signaling (GO:0070528)	0.149409	1	6.22665	PLEK
positive regulation of heterotypic cell-cell adhesion (GO:0034116)	0.149409	1	6.22665	TNF
negative regulation of potassium ion transport (GO:0043267)	0.149409	1	6.22665	PTK2B
metanephric mesenchyme development (GO:0072075)	0.149409	1	6.22665	BASP1
response to nitric oxide (GO:0071731)	0.149409	1	6.22665	CCL19
regulation of synaptic vesicle cycle (GO:0098693)	0.149409	1	6.22665	SYN1
regulation of serine-type endopeptidase activity (GO:1900003)	0.149409	1	6.22665	CR1
regulation of chromatin silencing (GO:0031935)	0.149409	1	6.22665	MIER1
positive regulation of T-helper cell differentiation (GO:0045624)	0.149409	1	6.22665	CCL19
cardiac muscle cell membrane repolarization (GO:0099622)	0.149409	1	6.22665	KCNJ2
positive regulation of interferon-gamma biosynthetic process (GO:0045078)	0.149409	1	6.22665	IL27
membrane repolarization during action potential (GO:0086011)	0.149409	1	6.22665	KCNJ2
negative regulation of I-kappaB kinase/NF-kappaB signaling (GO:0043124)	0.150078	1	2.9146	PER1;RHOH
regulation of intrinsic apoptotic signaling pathway (GO:2001242)	0.150078	1	2.9146	BCL2A1;S100A8
negative regulation of cellular biosynthetic process (GO:0031327)	0.150078	1	2.9146	CEACAM1;PLEK
postreplication repair (GO:0006301)	0.150078	1	2.9146	UBE2L6;ISG15
positive regulation of organelle assembly (GO:1902117)	0.150078	1	2.9146	LCP1;TNF
positive regulation of gene expression, epigenetic (GO:0045815)	0.150078	1	2.9146	PADI2;ACTB
regulation of epithelial cell migration (GO:0010632)	0.155174	1	2.85388	CEACAM1;PFN1
positive regulation of chemotaxis (GO:0050921)	0.155174	1	2.85388	CXCL10;CCL19
vesicle fusion (GO:0006906)	0.158398	1	2.18595	SAMD9L;SAMD9;RAB8A
negative regulation of cellular process (GO:0048523)	0.160063	1	1.41091	IFITM1;PPP1R13B;PODXL;PLXNA2;EIF2AK2;PTK2B;IFIT3;S100A11;APOBEC3A;BAP1;RND1
regulation of reactive oxygen species metabolic process (GO:2000377)	0.160302	1	2.79564	RAC2;MPV17
regulation of release of sequestered calcium ion into cytosol (GO:0051279)	0.160302	1	2.79564	CXCL10;PTK2B
rRNA 3'-end processing (GO:0031125)	0.161835	1	5.70776	RPSA
regulation of double-strand break repair via nonhomologous end joining (GO:2001032)	0.161835	1	5.70776	TFIP11
regulation of vasculogenesis (GO:2001212)	0.161835	1	5.70776	CEACAM1
regulation of myoblast fusion (GO:1901739)	0.161835	1	5.70776	CD53
peptidyl-arginine modification (GO:0018195)	0.161835	1	5.70776	PADI2
regulation of viral life cycle (GO:1903900)	0.161835	1	5.70776	LAMP3
positive regulation of establishment of protein localization (GO:1904951)	0.161835	1	5.70776	TNF
mitochondrial outer membrane permeabilization (GO:0097345)	0.161835	1	5.70776	MOAP1
modification-dependent macromolecule catabolic process (GO:0043632)	0.161835	1	5.70776	ISG15
protein insertion into membrane (GO:0051205)	0.161835	1	5.70776	RTP4
regulation of actomyosin structure organization (GO:0110020)	0.161835	1	5.70776	WAS
positive regulation of T-helper 1 type immune response (GO:0002827)	0.161835	1	5.70776	CCL19
positive regulation of ruffle assembly (GO:1900029)	0.161835	1	5.70776	PFN1
nitric oxide metabolic process (GO:0046209)	0.161835	1	5.70776	GCH1
histone H3 deacetylation (GO:0070932)	0.161835	1	5.70776	PER1
regulation of establishment of endothelial barrier (GO:1903140)	0.161835	1	5.70776	TNF
regulation of mononuclear cell migration (GO:0071675)	0.161835	1	5.70776	TNF
positive regulation of peptidase activity (GO:0010952)	0.161835	1	5.70776	PRELID1
response to interleukin-6 (GO:0070741)	0.161835	1	5.70776	CHI3L1
aromatic compound biosynthetic process (GO:0019438)	0.161835	1	5.70776	GCH1
cellular response to fatty acid (GO:0071398)	0.161835	1	5.70776	FFAR2
regulation of hormone secretion (GO:0046883)	0.161835	1	5.70776	FFAR2
plasma membrane tubulation (GO:0097320)	0.161835	1	5.70776	BIN2
positive regulation of mRNA metabolic process (GO:1903313)	0.161835	1	5.70776	ZC3HAV1
negative regulation of leukocyte apoptotic process (GO:2000107)	0.161835	1	5.70776	CCL19
DNA deamination (GO:0045006)	0.161835	1	5.70776	APOBEC3A
negative regulation of fatty acid metabolic process (GO:0045922)	0.161835	1	5.70776	CEACAM1
positive regulation of granulocyte macrophage colony-stimulating factor production (GO:0032725)	0.161835	1	5.70776	DDX58
regulation of cytoskeleton organization (GO:0051493)	0.161915	1	2.16294	PHLDB1;S100A8;RND1
epithelial cell differentiation (GO:0030855)	0.165456	1	2.14041	DMBT1;BASP1;TPP1
negative regulation of protein ubiquitination (GO:0031397)	0.165461	1	2.73973	ISG15;ARRB2
neurogenesis (GO:0022008)	0.165461	1	2.73973	DCHS1;TRAK1
antigen processing and presentation of exogenous peptide antigen via MHC class II (GO:0019886)	0.16902	1	2.11834	HLA-DRB5;ACTR1B;FCER1G
negative regulation of cell motility (GO:2000146)	0.16902	1	2.11834	IFITM1;WAS;ARAP3
antigen processing and presentation of exogenous peptide antigen (GO:0002478)	0.16902	1	2.11834	HLA-DRB5;ACTR1B;FCER1G
regulation of exocytosis (GO:0017157)	0.170649	1	2.68601	CPLX2;RAB8A
regulation of cell growth (GO:0001558)	0.171674	1	1.70381	CEACAM1;SPHK1;BAP1;S100A8;CXCL16
antigen processing and presentation of peptide antigen via MHC class II (GO:0002495)	0.172606	1	2.09673	HLA-DRB5;ACTR1B;FCER1G
positive regulation of cell growth (GO:0030307)	0.172606	1	2.09673	SPHK1;S100A8;CXCL16
response to iron ion (GO:0010039)	0.174079	1	5.2687	HAMP
regulation of NMDA receptor activity (GO:2000310)	0.174079	1	5.2687	PTK2B
Notch receptor processing, ligand-dependent (GO:0035333)	0.174079	1	5.2687	PSENEN
steroid catabolic process (GO:0006706)	0.174079	1	5.2687	CYP19A1
positive regulation of actin nucleation (GO:0051127)	0.174079	1	5.2687	WAS
regulation of axon guidance (GO:1902667)	0.174079	1	5.2687	PLXNA2
regulation of granulocyte macrophage colony-stimulating factor production (GO:0032645)	0.174079	1	5.2687	DDX58
positive regulation of protein complex disassembly (GO:0043243)	0.174079	1	5.2687	TNF
regulation of macrophage differentiation (GO:0045649)	0.174079	1	5.2687	C1QC
glutamine family amino acid biosynthetic process (GO:0009084)	0.174079	1	5.2687	PYCR2
cellular potassium ion homeostasis (GO:0030007)	0.174079	1	5.2687	KCNJ2
regulation of cAMP metabolic process (GO:0030814)	0.174079	1	5.2687	CXCL10
catecholamine biosynthetic process (GO:0042423)	0.174079	1	5.2687	GCH1
copper ion homeostasis (GO:0055070)	0.174079	1	5.2687	ATP7B
cellular response to interleukin-15 (GO:0071350)	0.174079	1	5.2687	IL2RG
B cell activation involved in immune response (GO:0002312)	0.174079	1	5.2687	GAPT
negative regulation of viral release from host cell (GO:1902187)	0.174079	1	5.2687	TRIM21
positive regulation of muscle contraction (GO:0045933)	0.174079	1	5.2687	SPHK1
membrane repolarization (GO:0086009)	0.174079	1	5.2687	KCNJ2
cellular response to low-density lipoprotein particle stimulus (GO:0071404)	0.174079	1	5.2687	FCER1G
motile cilium assembly (GO:0044458)	0.174079	1	5.2687	DNAAF1
positive regulation of lamellipodium assembly (GO:0010592)	0.174079	1	5.2687	RAC2
regulation of T cell cytokine production (GO:0002724)	0.174079	1	5.2687	CLC
positive regulation of alpha-beta T cell proliferation (GO:0046641)	0.174079	1	5.2687	LGALS9
interleukin-15-mediated signaling pathway (GO:0035723)	0.174079	1	5.2687	IL2RG
regulation of leukocyte migration (GO:0002685)	0.174079	1	5.2687	RAC2
negative regulation of chemokine production (GO:0032682)	0.174079	1	5.2687	LGALS9
amyloid precursor protein metabolic process (GO:0042982)	0.174079	1	5.2687	PSENEN
response to fatty acid (GO:0070542)	0.174079	1	5.2687	FFAR2
regulation of synaptic vesicle transport (GO:1902803)	0.174079	1	5.2687	SYN1
ribonucleoprotein complex disassembly (GO:0032988)	0.174079	1	5.2687	TFIP11
positive regulation of ossification (GO:0045778)	0.175863	1	2.63435	IFITM1;ISG15
plasma membrane bounded cell projection morphogenesis (GO:0120039)	0.175863	1	2.63435	RAC2;RHOH
positive regulation of cell-substrate adhesion (GO:0010811)	0.175863	1	2.63435	PTK2B;ARHGEF7
regulation of DNA binding (GO:0051101)	0.175863	1	2.63435	JUN;BCL3
cellular response to transforming growth factor beta stimulus (GO:0071560)	0.179842	1	2.05479	JUN;ARRB2;FOS
embryonic organ development (GO:0048568)	0.181103	1	2.58465	TNF;NES
regulation of fibroblast migration (GO:0010762)	0.186146	1	4.89237	ARHGEF7
positive regulation of neural precursor cell proliferation (GO:2000179)	0.186146	1	4.89237	NES
regulation of nucleocytoplasmic transport (GO:0046822)	0.186146	1	4.89237	MX2
establishment or maintenance of actin cytoskeleton polarity (GO:0030950)	0.186146	1	4.89237	RND1
regulation of phosphate metabolic process (GO:0019220)	0.186146	1	4.89237	MCM7
regulation of platelet aggregation (GO:0090330)	0.186146	1	4.89237	CEACAM1
positive regulation of response to cytokine stimulus (GO:0060760)	0.186146	1	4.89237	DDX58
regulation of secretion (GO:0051046)	0.186146	1	4.89237	OAS2
negative regulation of Rho protein signal transduction (GO:0035024)	0.186146	1	4.89237	ARAP3
negative regulation of hemopoiesis (GO:1903707)	0.186146	1	4.89237	PTK2B
pancreas development (GO:0031016)	0.186146	1	4.89237	DNAAF1
copper ion transport (GO:0006825)	0.186146	1	4.89237	ATP7B
regulation of lymphocyte differentiation (GO:0045619)	0.186146	1	4.89237	PRELID1
regulation of defense response to virus (GO:0050688)	0.186146	1	4.89237	HERC5
regulation of neural precursor cell proliferation (GO:2000177)	0.186146	1	4.89237	NES
neuromuscular process controlling balance (GO:0050885)	0.186146	1	4.89237	TPP1
amyloid-beta metabolic process (GO:0050435)	0.186146	1	4.89237	PSENEN
smooth muscle contraction (GO:0006939)	0.186146	1	4.89237	SMTN
neutrophil activation (GO:0042119)	0.186146	1	4.89237	FCER1G
Golgi to vacuole transport (GO:0006896)	0.186146	1	4.89237	GAK
necroptotic process (GO:0070266)	0.186146	1	4.89237	LY96
epiboly involved in wound healing (GO:0090505)	0.186146	1	4.89237	CEACAM1
positive regulation of vascular smooth muscle cell proliferation (GO:1904707)	0.186146	1	4.89237	JUN
regulation of gastrulation (GO:0010470)	0.186146	1	4.89237	PHLDB1
positive regulation of purine nucleotide metabolic process (GO:1900544)	0.186146	1	4.89237	CXCL10
regulation of protein modification by small protein conjugation or removal (GO:1903320)	0.186146	1	4.89237	EGR1
regulation of interferon-gamma biosynthetic process (GO:0045072)	0.186146	1	4.89237	IL27
regulation of mRNA catabolic process (GO:0061013)	0.186146	1	4.89237	ZC3HAV1
regulation of response to interferon-gamma (GO:0060330)	0.186146	1	4.89237	CDC37
regulation of adaptive immune response (GO:0002819)	0.186146	1	4.89237	SAMSN1
estrogen metabolic process (GO:0008210)	0.186146	1	4.89237	CYP19A1
negative regulation of T cell receptor signaling pathway (GO:0050860)	0.186146	1	4.89237	CEACAM1
positive regulation of smooth muscle contraction (GO:0045987)	0.186146	1	4.89237	SPHK1
negative regulation of cation transmembrane transport (GO:1904063)	0.186146	1	4.89237	HAMP
action potential (GO:0001508)	0.186365	1	2.53678	CACNA1A;KCNJ2
negative regulation of cellular component organization (GO:0051129)	0.186365	1	2.53678	TFIP11;TNF
negative regulation of supramolecular fiber organization (GO:1902904)	0.186365	1	2.53678	TBCD;PFN1
endocytosis (GO:0006897)	0.187904	1	1.56258	GAK;LMBR1L;RAC2;WAS;RHOH;CXCL16
regulation of cellular catabolic process (GO:0031329)	0.191649	1	2.49066	LAMP3;RAB8A
positive regulation of cysteine-type endopeptidase activity (GO:2001056)	0.191649	1	2.49066	TNFSF10;TNF
ribonucleoprotein complex assembly (GO:0022618)	0.194446	1	1.75623	XAB2;RPL3;RPSA;PATL1
positive regulation of vasculature development (GO:1904018)	0.194553	1	1.97576	CEACAM1;SPHK1;CHI3L1
phagocytosis, engulfment (GO:0006911)	0.194553	1	1.97576	BIN2;RAC2;RHOH
ribosome assembly (GO:0042255)	0.196953	1	2.44618	RPL3;RPSA
myeloid cell development (GO:0061515)	0.198036	1	4.56621	EVI2B
pseudouridine synthesis (GO:0001522)	0.198036	1	4.56621	NOP10
membrane repolarization during cardiac muscle cell action potential (GO:0086013)	0.198036	1	4.56621	KCNJ2
vitamin D metabolic process (GO:0042359)	0.198036	1	4.56621	CYP1A1
heparan sulfate proteoglycan biosynthetic process (GO:0015012)	0.198036	1	4.56621	NDST1
maintenance of protein location in nucleus (GO:0051457)	0.198036	1	4.56621	BCL3
epithelial cilium movement (GO:0003351)	0.198036	1	4.56621	DNAAF1
positive regulation of mesonephros development (GO:0061213)	0.198036	1	4.56621	BASP1
lipoxygenase pathway (GO:0019372)	0.198036	1	4.56621	ALOX5AP
positive regulation of cytokine production involved in immune response (GO:0002720)	0.198036	1	4.56621	FFAR2
regulation of interleukin-4 production (GO:0032673)	0.198036	1	4.56621	LGALS9
anterograde synaptic vesicle transport (GO:0048490)	0.198036	1	4.56621	BLOC1S1
regulation of establishment of cell polarity (GO:2000114)	0.198036	1	4.56621	PTK2B
unsaturated fatty acid biosynthetic process (GO:0006636)	0.198036	1	4.56621	ALOX5AP
positive regulation of telomerase RNA localization to Cajal body (GO:1904874)	0.198036	1	4.56621	NOP10
mitochondrion localization (GO:0051646)	0.198036	1	4.56621	TRAK1
regulation of clathrin-dependent endocytosis (GO:2000369)	0.198036	1	4.56621	ARAP3
nitric oxide mediated signal transduction (GO:0007263)	0.198036	1	4.56621	FPR1
negative regulation of lipid catabolic process (GO:0050995)	0.198036	1	4.56621	TNF
negative regulation of release of cytochrome c from mitochondria (GO:0090201)	0.198036	1	4.56621	PRELID1
negative regulation of cellular component movement (GO:0051271)	0.198036	1	4.56621	WAS
positive regulation of membrane protein ectodomain proteolysis (GO:0051044)	0.198036	1	4.56621	TNF
negative regulation of axon extension involved in axon guidance (GO:0048843)	0.198036	1	4.56621	SEMA3F
negative regulation of platelet activation (GO:0010544)	0.198036	1	4.56621	CEACAM1
negative regulation of cytokine production involved in immune response (GO:0002719)	0.198036	1	4.56621	TNF
positive regulation of interleukin-4 production (GO:0032753)	0.198036	1	4.56621	LGALS9
positive regulation of syncytium formation by plasma membrane fusion (GO:0060143)	0.198036	1	4.56621	CD53
regulation of protein complex disassembly (GO:0043244)	0.198036	1	4.56621	TNF
regulation of lymphocyte proliferation (GO:0050670)	0.198036	1	4.56621	IL27
toll-like receptor 4 signaling pathway (GO:0034142)	0.198036	1	4.56621	LY96
regulation of T cell mediated cytotoxicity (GO:0001914)	0.198036	1	4.56621	CEACAM1
synaptic vesicle transport along microtubule (GO:0099517)	0.198036	1	4.56621	BLOC1S1
sulfate transport (GO:0008272)	0.198036	1	4.56621	SLC26A8
regulation of peptide secretion (GO:0002791)	0.198036	1	4.56621	FFAR2
inhibition of cysteine-type endopeptidase activity (GO:0097340)	0.198036	1	4.56621	CARD16
base conversion or substitution editing (GO:0016553)	0.198036	1	4.56621	APOBEC3A
positive regulation of cellular catabolic process (GO:0031331)	0.202017	1	1.93849	ZC3HAV1;TNF;TRIM21
response to endoplasmic reticulum stress (GO:0034976)	0.202017	1	1.93849	JUN;CASP4;TXNDC11
positive regulation of cellular component organization (GO:0051130)	0.202017	1	1.93849	PLEKHM2;CCL19;TNF
regulation of Rho protein signal transduction (GO:0035023)	0.202274	1	2.40327	GPR65;ARAP3
protein homotetramerization (GO:0051289)	0.202274	1	2.40327	GBP5;KCNJ2
positive regulation of cellular biosynthetic process (GO:0031328)	0.203417	1	1.7231	EGR1;BCL3;CCL19;TNF
response to light stimulus (GO:0009416)	0.207612	1	2.36183	PER1;CRY2
regulation of epidermal growth factor receptor signaling pathway (GO:0042058)	0.207612	1	2.36183	CEACAM1;ARHGEF7
positive regulation of cell morphogenesis involved in differentiation (GO:0010770)	0.207612	1	2.36183	PLXNA2;ARHGEF7
regulation of protein activation cascade (GO:2000257)	0.209548	1	1.90259	CR1;C3AR1;C1QC
regulation of actin nucleation (GO:0051125)	0.209754	1	4.28082	WAS
positive regulation of secretion (GO:0051047)	0.209754	1	4.28082	CYP19A1
Notch receptor processing (GO:0007220)	0.209754	1	4.28082	PSENEN
DNA alkylation (GO:0006305)	0.209754	1	4.28082	FOS
activation of NF-kappaB-inducing kinase activity (GO:0007250)	0.209754	1	4.28082	CHI3L1
sympathetic nervous system development (GO:0048485)	0.209754	1	4.28082	SEMA3F
regulation of bicellular tight junction assembly (GO:2000810)	0.209754	1	4.28082	TNF
positive regulation of antigen receptor-mediated signaling pathway (GO:0050857)	0.209754	1	4.28082	STAP1
DNA methylation or demethylation (GO:0044728)	0.209754	1	4.28082	FOS
positive regulation of myotube differentiation (GO:0010831)	0.209754	1	4.28082	CD53
negative regulation of DNA replication (GO:0008156)	0.209754	1	4.28082	S100A11
regulation of osteoblast proliferation (GO:0033688)	0.209754	1	4.28082	EIF2AK2
positive regulation of cyclic nucleotide metabolic process (GO:0030801)	0.209754	1	4.28082	CXCL10
positive regulation of nitric-oxide synthase activity (GO:0051000)	0.209754	1	4.28082	GCH1
regulation of stem cell proliferation (GO:0072091)	0.209754	1	4.28082	EIF2AK2
regulation of necroptotic process (GO:0060544)	0.209754	1	4.28082	SLC25A4
mitochondrial fusion (GO:0008053)	0.209754	1	4.28082	BCL2A1
regulation of membrane repolarization (GO:0060306)	0.209754	1	4.28082	KCNJ2
ruffle organization (GO:0031529)	0.209754	1	4.28082	PLEK
inner dynein arm assembly (GO:0036159)	0.209754	1	4.28082	DNAAF1
negative regulation of lipid storage (GO:0010888)	0.209754	1	4.28082	TNF
regulation of interferon-alpha production (GO:0032647)	0.209754	1	4.28082	DDX58
programmed necrotic cell death (GO:0097300)	0.209754	1	4.28082	LY96
positive regulation of DNA-templated transcription, initiation (GO:2000144)	0.209754	1	4.28082	JUN
cell junction assembly (GO:0034329)	0.212964	1	2.3218	TBCD;ACTB
regulation of extrinsic apoptotic signaling pathway (GO:2001236)	0.212964	1	2.3218	MADD;TNFSF10
cell morphogenesis (GO:0000902)	0.212964	1	2.3218	RAC2;RHOH
regulation of complement activation (GO:0030449)	0.213337	1	1.88513	CR1;C3AR1;C1QC
nucleosome assembly (GO:0006334)	0.21833	1	2.28311	HIST2H2BE;HIST1H2BC
muscle organ development (GO:0007517)	0.21833	1	2.28311	CXCL10;SMTN
membrane lipid biosynthetic process (GO:0046467)	0.21833	1	2.28311	CERS6;SPHK1
regulation of protein sumoylation (GO:0033233)	0.2213	1	4.02901	EGR1
regulation of tissue remodeling (GO:0034103)	0.2213	1	4.02901	CEACAM1
negative regulation of axon guidance (GO:1902668)	0.2213	1	4.02901	SEMA3F
negative regulation of antigen receptor-mediated signaling pathway (GO:0050858)	0.2213	1	4.02901	CEACAM1
cardiac muscle cell contraction (GO:0086003)	0.2213	1	4.02901	KCNJ2
regulation of lipid catabolic process (GO:0050994)	0.2213	1	4.02901	TNF
regulation of transposition (GO:0010528)	0.2213	1	4.02901	APOBEC3A
negative regulation of B cell activation (GO:0050869)	0.2213	1	4.02901	SAMSN1
negative regulation of lipid biosynthetic process (GO:0051055)	0.2213	1	4.02901	CEACAM1
negative regulation of interleukin-8 production (GO:0032717)	0.2213	1	4.02901	BCL3
negative regulation of tumor necrosis factor-mediated signaling pathway (GO:0010804)	0.2213	1	4.02901	CARD16
negative regulation of intracellular transport (GO:0032387)	0.2213	1	4.02901	LGALS9
negative regulation of cellular carbohydrate metabolic process (GO:0010677)	0.2213	1	4.02901	PLEK
positive regulation of macrophage activation (GO:0043032)	0.2213	1	4.02901	STAP1
regulation of synaptic vesicle exocytosis (GO:2000300)	0.2213	1	4.02901	SYN1
positive regulation by host of viral transcription (GO:0043923)	0.2213	1	4.02901	JUN
regulation of T cell migration (GO:2000404)	0.2213	1	4.02901	CXCL10
regulation of lamellipodium organization (GO:1902743)	0.2213	1	4.02901	WAS
regulation of establishment or maintenance of cell polarity (GO:0032878)	0.2213	1	4.02901	PTK2B
regulation of B cell receptor signaling pathway (GO:0050855)	0.2213	1	4.02901	STAP1
detection of mechanical stimulus (GO:0050982)	0.2213	1	4.02901	PIEZO1
cellular monovalent inorganic cation homeostasis (GO:0030004)	0.2213	1	4.02901	KCNJ2
membrane depolarization during cardiac muscle cell action potential (GO:0086012)	0.2213	1	4.02901	KCNJ2
mitotic G2 DNA damage checkpoint (GO:0007095)	0.2213	1	4.02901	TAOK3
MAPK cascade (GO:0000165)	0.22195	1	1.47827	TAOK3;RASA3;CSF2RB;LGALS9;IL2RG;TNF
positive regulation of T cell proliferation (GO:0042102)	0.223707	1	2.24568	CCL19;LILRB2
glycosaminoglycan metabolic process (GO:0030203)	0.223707	1	2.24568	NDST1;HS3ST3A1
protein targeting to membrane (GO:0006612)	0.223707	1	2.24568	RTP4;ATG4B
positive regulation of cellular amide metabolic process (GO:0034250)	0.223707	1	2.24568	BCL3;TNF
regulation of humoral immune response (GO:0002920)	0.228633	1	1.8184	CR1;C3AR1;C1QC
positive regulation of type I interferon production (GO:0032481)	0.229094	1	2.20946	ZBP1;DDX58
second-messenger-mediated signaling (GO:0019932)	0.229094	1	2.20946	SPHK1;FPR1
regulation of telomerase RNA localization to Cajal body (GO:1904872)	0.232679	1	3.80518	NOP10
positive regulation of synaptic transmission, glutamatergic (GO:0051968)	0.232679	1	3.80518	PTK2B
organelle fusion (GO:0048284)	0.232679	1	3.80518	BCL2A1
membrane protein ectodomain proteolysis (GO:0006509)	0.232679	1	3.80518	PSENEN
regulation of viral process (GO:0050792)	0.232679	1	3.80518	LAMP3
receptor localization to synapse (GO:0097120)	0.232679	1	3.80518	RAB8A
negative regulation of osteoclast differentiation (GO:0045671)	0.232679	1	3.80518	LILRB3
maintenance of protein localization in organelle (GO:0072595)	0.232679	1	3.80518	BCL3
leukotriene biosynthetic process (GO:0019370)	0.232679	1	3.80518	ALOX5AP
regulation of mitochondrial membrane permeability (GO:0046902)	0.232679	1	3.80518	SLC25A4
regulation of lipopolysaccharide-mediated signaling pathway (GO:0031664)	0.232679	1	3.80518	CARD16
regulation of dephosphorylation (GO:0035303)	0.232679	1	3.80518	PPP1R14B
negative regulation of protein dephosphorylation (GO:0035308)	0.232679	1	3.80518	CRY2
outer dynein arm assembly (GO:0036158)	0.232679	1	3.80518	DNAAF1
acute-phase response (GO:0006953)	0.232679	1	3.80518	IL1RN
regulation of cAMP-mediated signaling (GO:0043949)	0.232679	1	3.80518	CXCL10
regulation of epithelial cell differentiation (GO:0030856)	0.232679	1	3.80518	CEACAM1
DNA methylation (GO:0006306)	0.232679	1	3.80518	FOS
regulation of peptidase activity (GO:0052547)	0.232679	1	3.80518	CSTA
cell-substrate adherens junction assembly (GO:0007045)	0.232679	1	3.80518	ARHGEF7
focal adhesion assembly (GO:0048041)	0.232679	1	3.80518	ARHGEF7
negative regulation of calcium-mediated signaling (GO:0050849)	0.232679	1	3.80518	PLEK
vesicle coating (GO:0006901)	0.23449	1	2.17439	SERPINA1;F5
COPII vesicle coating (GO:0048208)	0.23449	1	2.17439	SERPINA1;F5
vesicle targeting, rough ER to cis-Golgi (GO:0048207)	0.23449	1	2.17439	SERPINA1;F5
ribosomal large subunit biogenesis (GO:0042273)	0.23449	1	2.17439	RPL3;WDR74
nuclear-transcribed mRNA catabolic process, deadenylation-dependent decay (GO:0000288)	0.23449	1	2.17439	EDC4;PATL1
positive regulation of cell adhesion (GO:0045785)	0.239893	1	2.14041	TNF;SIRPB1
sphingolipid metabolic process (GO:0006665)	0.240237	1	1.77137	CERS6;SPHK1;ARSE
protein import into mitochondrial matrix (GO:0030150)	0.243892	1	3.6049	TIMM23
negative regulation of lymphocyte activation (GO:0051250)	0.243892	1	3.6049	SAMSN1
regulation of sprouting angiogenesis (GO:1903670)	0.243892	1	3.6049	CEACAM1
negative regulation of cell junction assembly (GO:1901889)	0.243892	1	3.6049	TNF
regulation of long-term synaptic potentiation (GO:1900271)	0.243892	1	3.6049	LILRB2
negative regulation of double-strand break repair (GO:2000780)	0.243892	1	3.6049	TFIP11
negative regulation of proteolysis involved in cellular protein catabolic process (GO:1903051)	0.243892	1	3.6049	LAMP3
maturation of 5.8S rRNA from tricistronic rRNA transcript (SSU-rRNA, 5.8S rRNA, LSU-rRNA) (GO:0000466)	0.243892	1	3.6049	RPSA
vesicle transport along microtubule (GO:0047496)	0.243892	1	3.6049	TRAK1
production of small RNA involved in gene silencing by RNA (GO:0070918)	0.243892	1	3.6049	ZC3H7A
negative regulation of transposition (GO:0010529)	0.243892	1	3.6049	APOBEC3A
sulfur compound transport (GO:0072348)	0.243892	1	3.6049	SLC26A8
negative regulation of response to biotic stimulus (GO:0002832)	0.243892	1	3.6049	CARD16
excitatory postsynaptic potential (GO:0060079)	0.243892	1	3.6049	ARRB2
positive regulation of oxidoreductase activity (GO:0051353)	0.243892	1	3.6049	TNF
ribosomal small subunit assembly (GO:0000028)	0.243892	1	3.6049	RPSA
intracellular estrogen receptor signaling pathway (GO:0030520)	0.243892	1	3.6049	PADI2
positive regulation of interferon-alpha production (GO:0032727)	0.243892	1	3.6049	DDX58
cellular polysaccharide biosynthetic process (GO:0033692)	0.243892	1	3.6049	NDST1
cellular response to interleukin-7 (GO:0098761)	0.243892	1	3.6049	IL2RG
positive regulation of excitatory postsynaptic potential (GO:2000463)	0.243892	1	3.6049	PTK2B
macromolecule biosynthetic process (GO:0009059)	0.243892	1	3.6049	TNF
positive regulation of blood coagulation (GO:0030194)	0.243892	1	3.6049	PLEK
interleukin-7-mediated signaling pathway (GO:0038111)	0.243892	1	3.6049	IL2RG
negative regulation of calcium ion transport (GO:0051926)	0.243892	1	3.6049	LILRB2
telomere capping (GO:0016233)	0.243892	1	3.6049	TFIP11
mitochondrial membrane organization (GO:0007006)	0.243892	1	3.6049	SLC25A4
protein localization to cell periphery (GO:1990778)	0.244127	1	1.75623	GAK;TNF;RAB8A
chromatin assembly (GO:0031497)	0.245302	1	2.10748	HIST2H2BE;HIST1H2BC
positive regulation of protein modification by small protein conjugation or removal (GO:1903322)	0.245302	1	2.10748	SPHK1;ARRB2
regulation of myeloid cell differentiation (GO:0045637)	0.245302	1	2.10748	SPI1;PTK2B
DNA synthesis involved in DNA repair (GO:0000731)	0.245302	1	2.10748	UBE2L6;ISG15
negative regulation of apoptotic signaling pathway (GO:2001234)	0.245302	1	2.10748	PRELID1;BCL2A1
calcium ion transport (GO:0006816)	0.248027	1	1.74135	CCR1;CCL8;CACNA1A
positive regulation of protein serine/threonine kinase activity (GO:0071902)	0.248027	1	1.74135	S100A12;CHI3L1;TNF
sphingolipid biosynthetic process (GO:0030148)	0.250715	1	2.07555	CERS6;SPHK1
regulation of phosphorylation (GO:0042325)	0.251937	1	1.72672	MCM7;KCTD20;STAP1
negative regulation of innate immune response (GO:0045824)	0.254942	1	3.42466	CR1
wound healing, spreading of cells (GO:0044319)	0.254942	1	3.42466	CEACAM1
embryonic digestive tract development (GO:0048566)	0.254942	1	3.42466	TNF
regulation of calcium ion transmembrane transport (GO:1903169)	0.254942	1	3.42466	PTK2B
axon extension (GO:0048675)	0.254942	1	3.42466	SEMA3F
intrinsic apoptotic signaling pathway in response to DNA damage by p53 class mediator (GO:0042771)	0.254942	1	3.42466	BCL3
dopamine metabolic process (GO:0042417)	0.254942	1	3.42466	GCH1
androgen metabolic process (GO:0008209)	0.254942	1	3.42466	CYP19A1
autophagy of nucleus (GO:0044804)	0.254942	1	3.42466	ATG4B
regulation of response to cytokine stimulus (GO:0060759)	0.254942	1	3.42466	DDX58
positive regulation of T cell migration (GO:2000406)	0.254942	1	3.42466	CXCL10
telomere maintenance via telomerase (GO:0007004)	0.254942	1	3.42466	NOP10
vesicle cytoskeletal trafficking (GO:0099518)	0.254942	1	3.42466	TRAK1
heparan sulfate proteoglycan metabolic process (GO:0030201)	0.254942	1	3.42466	NDST1
negative regulation of plasma membrane bounded cell projection assembly (GO:0120033)	0.254942	1	3.42466	STAP1
negative regulation of interferon-gamma production (GO:0032689)	0.254942	1	3.42466	LGALS9
regulation of cyclin-dependent protein serine/threonine kinase activity (GO:0000079)	0.256132	1	2.04457	HERC5;CDC37
COPII-coated vesicle budding (GO:0090114)	0.261551	1	2.0145	SERPINA1;F5
cobalamin metabolic process (GO:0009235)	0.26583	1	3.26158	TCN1
positive regulation of cellular component movement (GO:0051272)	0.26583	1	3.26158	CCL19
epoxygenase P450 pathway (GO:0019373)	0.26583	1	3.26158	CYP1A1
dendritic cell differentiation (GO:0097028)	0.26583	1	3.26158	CCL19
RNA-dependent DNA biosynthetic process (GO:0006278)	0.26583	1	3.26158	NOP10
mesoderm development (GO:0007498)	0.26583	1	3.26158	HCK
tetrapyrrole metabolic process (GO:0033013)	0.26583	1	3.26158	TCN1
negative regulation of cytokine biosynthetic process (GO:0042036)	0.26583	1	3.26158	BCL3
negative regulation of G-protein coupled receptor protein signaling pathway (GO:0045744)	0.26583	1	3.26158	PLEK
mitochondrial ATP synthesis coupled proton transport (GO:0042776)	0.26583	1	3.26158	ATP5J2
response to nicotine (GO:0035094)	0.26583	1	3.26158	TNF
positive regulation of defense response to virus by host (GO:0002230)	0.26583	1	3.26158	DDX58
cellular response to alkaloid (GO:0071312)	0.26583	1	3.26158	TNF
long-term synaptic potentiation (GO:0060291)	0.26583	1	3.26158	PTK2B
positive regulation of receptor internalization (GO:0002092)	0.26583	1	3.26158	ARRB2
ERK1 and ERK2 cascade (GO:0070371)	0.26583	1	3.26158	LGALS9
negative regulation of cell cycle arrest (GO:0071157)	0.26583	1	3.26158	EVI2B
regulation of endothelial cell migration (GO:0010594)	0.266971	1	1.98531	CEACAM1;PTK2B
response to organic cyclic compound (GO:0014070)	0.266971	1	1.98531	CYP1A1;TNF
organonitrogen compound biosynthetic process (GO:1901566)	0.272338	1	1.51366	CERS6;GCH1;SPHK1;PYCR2
G-protein coupled receptor signaling pathway, coupled to cyclic nucleotide second messenger (GO:0007187)	0.275568	1	1.64384	CCR1;FPR1;GPR84
Fc-epsilon receptor signaling pathway (GO:0038095)	0.275572	1	1.50534	JUN;FCER1G;LCP2;FOS
regulation of intracellular signal transduction (GO:1902531)	0.276315	1	1.29845	CEACAM1;PPP1R13B;RAC2;RHOH;ARAP3;ARHGEF7;PRKAB1;TNF
regulation of calcium ion transport into cytosol (GO:0010522)	0.276561	1	3.11333	PTK2B
regulation of interferon-gamma-mediated signaling pathway (GO:0060334)	0.276561	1	3.11333	CDC37
protein homotrimerization (GO:0070207)	0.276561	1	3.11333	ALOX5AP
lymphocyte activation involved in immune response (GO:0002285)	0.276561	1	3.11333	LCP1
hematopoietic progenitor cell differentiation (GO:0002244)	0.276561	1	3.11333	PLEK
negative regulation of myeloid cell differentiation (GO:0045638)	0.276561	1	3.11333	PTK2B
negative regulation of actin filament polymerization (GO:0030837)	0.276561	1	3.11333	PFN1
positive regulation of interleukin-10 production (GO:0032733)	0.276561	1	3.11333	LGALS9
rRNA modification (GO:0000154)	0.276561	1	3.11333	NOP10
regulation of membrane protein ectodomain proteolysis (GO:0051043)	0.276561	1	3.11333	TNF
regulation of ERBB signaling pathway (GO:1901184)	0.276561	1	3.11333	CEACAM1
negative regulation of nervous system development (GO:0051961)	0.276561	1	3.11333	ARHGEF15
positive regulation of phosphatase activity (GO:0010922)	0.276561	1	3.11333	PLEK
cellular protein metabolic process (GO:0044267)	0.277143	1	1.27363	PSENEN;RPL3;SERPINA1;DMBT1;UBE2L6;RPSA;CSF2RB;BAP1;F5
histone acetylation (GO:0016573)	0.277809	1	1.92938	PER1;SPI1
response to insulin (GO:0032868)	0.277809	1	1.92938	CEACAM1;RAB8A
Fc receptor signaling pathway (GO:0038093)	0.278812	1	1.49712	JUN;FCER1G;LCP2;FOS
G2/M transition of mitotic cell cycle (GO:0000086)	0.27953	1	1.63079	NES;TUBA4A;RAB8A
lysosomal transport (GO:0007041)	0.283224	1	1.90259	GAK;TRAK1
regulation of neuron death (GO:1901214)	0.283224	1	1.90259	EGR1;FOS
response to metal ion (GO:0010038)	0.283224	1	1.90259	ATP7B;HAMP
non-canonical Wnt signaling pathway (GO:0035567)	0.283497	1	1.61795	GNG2;ARRB2;PFN1
cell cycle G2/M phase transition (GO:0044839)	0.283497	1	1.61795	NES;TUBA4A;RAB8A
mitotic G2/M transition checkpoint (GO:0044818)	0.287134	1	2.97796	TAOK3
cellular response to catecholamine stimulus (GO:0071870)	0.287134	1	2.97796	GNG2
melanosome organization (GO:0032438)	0.287134	1	2.97796	BLOC1S1
regulation of proteolysis involved in cellular protein catabolic process (GO:1903050)	0.287134	1	2.97796	PTK2B
lamellipodium assembly (GO:0030032)	0.287134	1	2.97796	ARHGEF7
positive regulation of mRNA catabolic process (GO:0061014)	0.287134	1	2.97796	ZC3HAV1
protein K48-linked deubiquitination (GO:0071108)	0.287134	1	2.97796	BAP1
metanephros development (GO:0001656)	0.287134	1	2.97796	BASP1
membrane assembly (GO:0071709)	0.287134	1	2.97796	GAK
regulation of smooth muscle contraction (GO:0006940)	0.287134	1	2.97796	SPHK1
protein localization to Golgi apparatus (GO:0034067)	0.287134	1	2.97796	GAK
regulation of cell size (GO:0008361)	0.287134	1	2.97796	PLEK
regulation of microtubule cytoskeleton organization (GO:0070507)	0.287134	1	2.97796	PHLDB1
regulation of androgen receptor signaling pathway (GO:0060765)	0.287134	1	2.97796	ARRB2
negative regulation of axon extension (GO:0030517)	0.287134	1	2.97796	SEMA3F
regulation of protein processing (GO:0070613)	0.287469	1	1.60531	CR1;C3AR1;C1QC
nucleic acid phosphodiester bond hydrolysis (GO:0090305)	0.288636	1	1.87652	EDC4;RNASE2
positive regulation of epithelial cell migration (GO:0010634)	0.294044	1	1.85117	PTK2B;PFN1
regulation of gene expression, epigenetic (GO:0040029)	0.294044	1	1.85117	SPI1;ACTB
protein localization to plasma membrane (GO:0072659)	0.295426	1	1.58061	GAK;TNF;RAB8A
membrane protein intracellular domain proteolysis (GO:0031293)	0.297554	1	2.85388	PSENEN
positive regulation of immune effector process (GO:0002699)	0.297554	1	2.85388	LGALS9
negative regulation of cytoskeleton organization (GO:0051494)	0.297554	1	2.85388	PFN1
negative regulation of sequestering of calcium ion (GO:0051283)	0.297554	1	2.85388	CCL19
camera-type eye development (GO:0043010)	0.297554	1	2.85388	NES
intrinsic apoptotic signaling pathway in response to endoplasmic reticulum stress (GO:0070059)	0.297554	1	2.85388	CASP4
axoneme assembly (GO:0035082)	0.297554	1	2.85388	DNAAF1
regulation of transmembrane transport (GO:0034762)	0.297554	1	2.85388	KCNJ2
regulation of chemotaxis (GO:0050920)	0.297554	1	2.85388	CCL19
positive regulation of dephosphorylation (GO:0035306)	0.297554	1	2.85388	LILRB2
chaperone mediated protein folding requiring cofactor (GO:0051085)	0.297554	1	2.85388	GAK
negative regulation of interleukin-6 production (GO:0032715)	0.297554	1	2.85388	TNF
proteoglycan biosynthetic process (GO:0030166)	0.297554	1	2.85388	NDST1
regulation of actin cytoskeleton organization (GO:0032956)	0.299445	1	1.82648	PTK2B;RND1
regulation of hematopoietic stem cell differentiation (GO:1902036)	0.30484	1	1.80245	SPI1;EIF2AK2
nucleic acid-templated transcription (GO:0097659)	0.30484	1	1.80245	XAB2;BCL3
heterotypic cell-cell adhesion (GO:0034113)	0.307822	1	2.73973	LILRB2
regulation of centrosome duplication (GO:0010824)	0.307822	1	2.73973	FBXW5
organophosphate ester transport (GO:0015748)	0.307822	1	2.73973	PRELID1
response to copper ion (GO:0046688)	0.307822	1	2.73973	ATP7B
lamellipodium organization (GO:0097581)	0.307822	1	2.73973	ARHGEF7
negative regulation of gene expression, epigenetic (GO:0045814)	0.307822	1	2.73973	SPI1
regulation of protein ubiquitination involved in ubiquitin-dependent protein catabolic process (GO:2000058)	0.307822	1	2.73973	PTK2B
potassium ion homeostasis (GO:0055075)	0.307822	1	2.73973	KCNJ2
peptide catabolic process (GO:0043171)	0.307822	1	2.73973	TPP1
positive regulation of leukocyte mediated cytotoxicity (GO:0001912)	0.307822	1	2.73973	STAP1
response to alcohol (GO:0097305)	0.307822	1	2.73973	CCL19
modulation of excitatory postsynaptic potential (GO:0098815)	0.307822	1	2.73973	PTK2B
regulation of apoptotic signaling pathway (GO:2001233)	0.307822	1	2.73973	MADD
regulation of viral release from host cell (GO:1902186)	0.307822	1	2.73973	TRIM21
positive regulation of Rho protein signal transduction (GO:0035025)	0.307822	1	2.73973	GPR65
protein depolymerization (GO:0051261)	0.307822	1	2.73973	MICAL3
regulation of vascular smooth muscle cell proliferation (GO:1904705)	0.307822	1	2.73973	JUN
positive regulation of calcium ion transmembrane transport (GO:1904427)	0.307822	1	2.73973	CXCL10
positive regulation of embryonic development (GO:0040019)	0.307822	1	2.73973	PHLDB1
regulation of cellular protein localization (GO:1903827)	0.307822	1	2.73973	LCP1
positive regulation of nitric oxide biosynthetic process (GO:0045429)	0.307822	1	2.73973	TNF
signal transduction in response to DNA damage (GO:0042770)	0.307822	1	2.73973	BCL3
positive regulation of nitric oxide metabolic process (GO:1904407)	0.307822	1	2.73973	TNF
regulation of hematopoietic progenitor cell differentiation (GO:1901532)	0.310227	1	1.77904	SPI1;EIF2AK2
adenylate cyclase-modulating G-protein coupled receptor signaling pathway (GO:0007188)	0.311377	1	1.53343	GPR65;FPR1;GPR84
positive regulation of cell differentiation (GO:0045597)	0.314796	1	1.41223	IFITM1;JUN;CEACAM1;JUND
adenylate cyclase-activating G-protein coupled receptor signaling pathway (GO:0007189)	0.315606	1	1.75623	GNG2;GPR65
extracellular matrix disassembly (GO:0022617)	0.315606	1	1.75623	LCP1;MMP8
antigen processing and presentation of exogenous peptide antigen via MHC class I (GO:0042590)	0.315606	1	1.75623	FCER1G;CYBB
positive regulation of interferon-beta production (GO:0032728)	0.317941	1	2.63435	DDX58
lipid modification (GO:0030258)	0.317941	1	2.63435	CYP1A1
regulation of centrosome cycle (GO:0046605)	0.317941	1	2.63435	FBXW5
regulation of p38MAPK cascade (GO:1900744)	0.317941	1	2.63435	PER1
response to ketone (GO:1901654)	0.317941	1	2.63435	CCL19
negative chemotaxis (GO:0050919)	0.317941	1	2.63435	SEMA3F
regulation of supramolecular fiber organization (GO:1902903)	0.317941	1	2.63435	WAS
negative regulation of catalytic activity (GO:0043086)	0.317941	1	2.63435	NES
positive regulation of cAMP metabolic process (GO:0030816)	0.317941	1	2.63435	CXCL10
regulation of microtubule-based process (GO:0032886)	0.317941	1	2.63435	PHLDB1
fat-soluble vitamin metabolic process (GO:0006775)	0.317941	1	2.63435	CYP1A1
regulation of T cell receptor signaling pathway (GO:0050856)	0.317941	1	2.63435	CEACAM1
endocrine system development (GO:0035270)	0.317941	1	2.63435	HESX1
snRNA 3'-end processing (GO:0034472)	0.317941	1	2.63435	USB1
nucleosome organization (GO:0034728)	0.320975	1	1.734	HIST2H2BE;HIST1H2BC
response to calcium ion (GO:0051592)	0.320975	1	1.734	ITPKB;ALOX5AP
ERBB signaling pathway (GO:0038127)	0.326334	1	1.71233	CDC37;PTK2B
regulation of protein serine/threonine kinase activity (GO:0071900)	0.326334	1	1.71233	HERC5;CDC37
cellular response to hormone stimulus (GO:0032870)	0.326334	1	1.71233	JUN;JUND
ATP synthesis coupled proton transport (GO:0015986)	0.327912	1	2.53678	ATP5J2
regulation of intracellular steroid hormone receptor signaling pathway (GO:0033143)	0.327912	1	2.53678	ARRB2
telomere maintenance via telomere lengthening (GO:0010833)	0.327912	1	2.53678	NOP10
phosphatidylinositol phosphorylation (GO:0046854)	0.327912	1	2.53678	PI4K2B
negative regulation of peptidyl-tyrosine phosphorylation (GO:0050732)	0.327912	1	2.53678	SAMSN1
cristae formation (GO:0042407)	0.327912	1	2.53678	ATP5J2
negative regulation of microtubule polymerization or depolymerization (GO:0031111)	0.327912	1	2.53678	TBCD
negative regulation of small GTPase mediated signal transduction (GO:0051058)	0.327912	1	2.53678	RASA3
transition metal ion transport (GO:0000041)	0.327912	1	2.53678	ATP7B
release of sequestered calcium ion into cytosol (GO:0051209)	0.327912	1	2.53678	CCL19
purine ribonucleoside triphosphate biosynthetic process (GO:0009206)	0.327912	1	2.53678	ATP5J2
positive regulation of substrate adhesion-dependent cell spreading (GO:1900026)	0.327912	1	2.53678	ARHGEF7
regulation of protein localization to cell surface (GO:2000008)	0.327912	1	2.53678	TNF
protein catabolic process (GO:0030163)	0.331681	1	1.69119	CEACAM1;TPP1
negative regulation of cellular macromolecule biosynthetic process (GO:2000113)	0.333116	1	1.20398	PER1;JUN;SPI1;BASP1;BCL3;CRY2;EIF2AK2;TNF;S100A11
phosphorylation (GO:0016310)	0.334358	1	1.2421	FGR;HCK;CCL11;TAOK3;EIF2AK2;PTK2B;PRKAB1
inorganic cation transmembrane transport (GO:0098662)	0.335341	1	1.46771	UCP2;CACNA1A;ATP5J2
regulation of anatomical structure morphogenesis (GO:0022603)	0.337017	1	1.67056	PHLDB1;CEACAM1
modulation of chemical synaptic transmission (GO:0050804)	0.337017	1	1.67056	CPLX2;SYN1
negative regulation of NF-kappaB transcription factor activity (GO:0032088)	0.337017	1	1.67056	ARRB2;TRIM21
positive regulation of protein secretion (GO:0050714)	0.337017	1	1.67056	FGR;TNF
positive regulation of gene expression (GO:0010628)	0.337361	1	1.15488	EGR1;JUN;SPI1;DDX58;SERPINB9;FOS;PRKAB1;TNF;ACTB;LAMP3;BCL3;STAP1;LGALS9
neuron projection extension (GO:1990138)	0.337737	1	2.44618	SEMA3F
cellular response to ketone (GO:1901655)	0.337737	1	2.44618	GNG2
cellular response to alcohol (GO:0097306)	0.337737	1	2.44618	GNG2
RNA phosphodiester bond hydrolysis (GO:0090501)	0.337737	1	2.44618	RNASE2
negative regulation of proteasomal protein catabolic process (GO:1901799)	0.337737	1	2.44618	LAMP3
cellular amino acid biosynthetic process (GO:0008652)	0.337737	1	2.44618	PYCR2
regulation of receptor internalization (GO:0002090)	0.337737	1	2.44618	ARRB2
aerobic respiration (GO:0009060)	0.337737	1	2.44618	BLOC1S1
positive regulation of phosphate metabolic process (GO:0045937)	0.337737	1	2.44618	KCTD20
positive regulation of cytosolic calcium ion concentration involved in phospholipase C-activating G-protein coupled signaling pathway (GO:0051482)	0.337737	1	2.44618	GPR65
positive regulation of protein tyrosine kinase activity (GO:0061098)	0.337737	1	2.44618	STAP1
positive regulation of extrinsic apoptotic signaling pathway (GO:2001238)	0.337737	1	2.44618	TNFSF10
lytic vacuole organization (GO:0080171)	0.337737	1	2.44618	TPP1
cardiac muscle cell action potential involved in contraction (GO:0086002)	0.337737	1	2.44618	KCNJ2
positive regulation of calcium-mediated signaling (GO:0050850)	0.337737	1	2.44618	CCL4
production of miRNAs involved in gene silencing by miRNA (GO:0035196)	0.337737	1	2.44618	ZC3H7A
neural crest cell migration (GO:0001755)	0.337737	1	2.44618	SEMA3F
regulation of lipid biosynthetic process (GO:0046890)	0.337737	1	2.44618	CEACAM1
antigen processing and presentation of peptide antigen via MHC class I (GO:0002474)	0.337737	1	2.44618	FCER1G
regulation of fatty acid biosynthetic process (GO:0042304)	0.337737	1	2.44618	CEACAM1
calcium ion import (GO:0070509)	0.337737	1	2.44618	CACNA1A
positive regulation of fibroblast proliferation (GO:0048146)	0.337737	1	2.44618	SPHK1
bicellular tight junction assembly (GO:0070830)	0.337737	1	2.44618	TBCD
positive regulation of multicellular organismal process (GO:0051240)	0.341222	1	1.3563	EIF2AK2;LILRB2;PFN1;TNF
establishment of protein localization to membrane (GO:0090150)	0.34234	1	1.65044	RTP4;ATG4B
positive regulation of protein ubiquitination (GO:0031398)	0.34234	1	1.65044	SPHK1;ARRB2
protein maturation (GO:0051604)	0.34234	1	1.65044	PSENEN;SRGN
cell-cell adhesion via plasma-membrane adhesion molecules (GO:0098742)	0.343324	1	1.44704	CEACAM1;SELL;DCHS1
regulation of autophagy (GO:0010506)	0.344533	1	1.34962	LAMP3;TRIM21;PRKAB1;RAB8A
dicarboxylic acid transport (GO:0006835)	0.34742	1	2.36183	SLC26A8
synaptic vesicle endocytosis (GO:0048488)	0.34742	1	2.36183	GAK
TRIF-dependent toll-like receptor signaling pathway (GO:0035666)	0.34742	1	2.36183	LY96
superoxide metabolic process (GO:0006801)	0.34742	1	2.36183	CYBB
cardiac muscle cell action potential (GO:0086001)	0.34742	1	2.36183	KCNJ2
regulation of embryonic development (GO:0045995)	0.34742	1	2.36183	PHLDB1
negative regulation of lymphocyte proliferation (GO:0050672)	0.34742	1	2.36183	LILRB2
coenzyme biosynthetic process (GO:0009108)	0.34742	1	2.36183	GCH1
B cell proliferation (GO:0042100)	0.34742	1	2.36183	GAPT
MyD88-dependent toll-like receptor signaling pathway (GO:0002755)	0.34742	1	2.36183	LY96
skeletal muscle organ development (GO:0060538)	0.34742	1	2.36183	BASP1
positive regulation of cellular process (GO:0048522)	0.347442	1	1.18774	HCK;JUN;JUND;SPHK1;PTK2B;TRIM21;S100A8;CXCL16;TNFSF13B
protein modification process (GO:0036211)	0.347649	1	1.63079	UBE2L6;BAP1
transmembrane receptor protein serine/threonine kinase signaling pathway (GO:0007178)	0.351301	1	1.42694	JUN;ARRB2;FOS
regulation of peptidyl-tyrosine phosphorylation (GO:0050730)	0.352944	1	1.6116	PTK2B;SAMSN1
ribosomal large subunit assembly (GO:0000027)	0.356961	1	2.28311	RPL3
regulation of protein insertion into mitochondrial membrane involved in apoptotic signaling pathway (GO:1900739)	0.356961	1	2.28311	PPP1R13B
beta-catenin-TCF complex assembly (GO:1904837)	0.356961	1	2.28311	TLE4
hippo signaling (GO:0035329)	0.356961	1	2.28311	DCHS1
connective tissue development (GO:0061448)	0.356961	1	2.28311	CHI3L1
bile acid and bile salt transport (GO:0015721)	0.356961	1	2.28311	CEACAM1
activation of JUN kinase activity (GO:0007257)	0.356961	1	2.28311	CCL19
'de novo' posttranslational protein folding (GO:0051084)	0.356961	1	2.28311	GAK
regulation of ARF protein signal transduction (GO:0032012)	0.356961	1	2.28311	ARAP3
MyD88-independent toll-like receptor signaling pathway (GO:0002756)	0.356961	1	2.28311	LY96
positive regulation of protein insertion into mitochondrial membrane involved in apoptotic signaling pathway (GO:1900740)	0.356961	1	2.28311	PPP1R13B
ATP-dependent chromatin remodeling (GO:0043044)	0.356961	1	2.28311	ACTB
regulation of blood coagulation (GO:0030193)	0.356961	1	2.28311	FCER1G
positive regulation of B cell proliferation (GO:0030890)	0.356961	1	2.28311	TNFSF13B
regulation of protein polymerization (GO:0032271)	0.356961	1	2.28311	PFN1
positive regulation of reactive oxygen species biosynthetic process (GO:1903428)	0.356961	1	2.28311	TNF
toll-like receptor signaling pathway (GO:0002224)	0.358224	1	1.59286	LY96;S100A8
regulation of MAP kinase activity (GO:0043405)	0.363489	1	1.57456	S100A12;TNF
negative regulation of toll-like receptor signaling pathway (GO:0034122)	0.366364	1	2.20946	LY96
negative regulation of tumor necrosis factor superfamily cytokine production (GO:1903556)	0.366364	1	2.20946	LGALS9
positive regulation of release of sequestered calcium ion into cytosol (GO:0051281)	0.366364	1	2.20946	CXCL10
organelle transport along microtubule (GO:0072384)	0.366364	1	2.20946	TRAK1
positive regulation of protein dephosphorylation (GO:0035307)	0.366364	1	2.20946	LILRB2
negative regulation of extrinsic apoptotic signaling pathway via death domain receptors (GO:1902042)	0.366364	1	2.20946	TNFSF10
positive regulation of viral genome replication (GO:0045070)	0.366364	1	2.20946	IFIT1
cellular zinc ion homeostasis (GO:0006882)	0.366364	1	2.20946	S100A8
lysosome organization (GO:0007040)	0.366364	1	2.20946	TPP1
liver development (GO:0001889)	0.366364	1	2.20946	DNAAF1
positive regulation of bone mineralization (GO:0030501)	0.366364	1	2.20946	ISG15
protein destabilization (GO:0031648)	0.366364	1	2.20946	TRIM21
gene silencing by miRNA (GO:0035195)	0.366364	1	2.20946	ZC3H7A
regulation of stem cell differentiation (GO:2000736)	0.368737	1	1.55666	SPI1;EIF2AK2
Wnt signaling pathway, planar cell polarity pathway (GO:0060071)	0.368737	1	1.55666	ARRB2;PFN1
negative regulation of cellular protein metabolic process (GO:0032269)	0.373968	1	1.53917	CSTA;EIF2AK2
SRP-dependent cotranslational protein targeting to membrane (GO:0006614)	0.373968	1	1.53917	RPL3;RPSA
regulation of establishment of planar polarity (GO:0090175)	0.373968	1	1.53917	ARRB2;PFN1
protein deacetylation (GO:0006476)	0.375629	1	2.14041	MIER1
positive regulation of calcium ion transport into cytosol (GO:0010524)	0.375629	1	2.14041	CXCL10
regulation of glutamate receptor signaling pathway (GO:1900449)	0.375629	1	2.14041	PTK2B
ceramide biosynthetic process (GO:0046513)	0.375629	1	2.14041	CERS6
ATP biosynthetic process (GO:0006754)	0.375629	1	2.14041	ATP5J2
mitochondrial transmembrane transport (GO:1990542)	0.375629	1	2.14041	UCP2
endodermal cell differentiation (GO:0035987)	0.375629	1	2.14041	MMP8
negative regulation of fat cell differentiation (GO:0045599)	0.375629	1	2.14041	TNF
G2 DNA damage checkpoint (GO:0031572)	0.375629	1	2.14041	TAOK3
positive regulation of T cell differentiation (GO:0045582)	0.375629	1	2.14041	LILRB2
regulation of erythrocyte differentiation (GO:0045646)	0.375629	1	2.14041	SPI1
regulation of nitric oxide biosynthetic process (GO:0045428)	0.375629	1	2.14041	TNF
protein tetramerization (GO:0051262)	0.379181	1	1.52207	GBP5;KCNJ2
positive regulation of intracellular protein transport (GO:0090316)	0.383067	1	1.35184	RAC2;RNASE2;BAP1
lipid transport (GO:0006869)	0.384377	1	1.50534	CEACAM1;PRELID1
protein-DNA complex assembly (GO:0065004)	0.384377	1	1.50534	HIST2H2BE;HIST1H2BC
axonemal dynein complex assembly (GO:0070286)	0.38476	1	2.07555	DNAAF1
protein acetylation (GO:0006473)	0.38476	1	2.07555	BLOC1S1
chemical synaptic transmission, postsynaptic (GO:0099565)	0.38476	1	2.07555	ARRB2
negative regulation of mitochondrion organization (GO:0010823)	0.38476	1	2.07555	PRELID1
positive regulation of cell-matrix adhesion (GO:0001954)	0.38476	1	2.07555	PTK2B
positive regulation of intrinsic apoptotic signaling pathway (GO:2001244)	0.38476	1	2.07555	S100A8
regulation of postsynaptic membrane potential (GO:0060078)	0.38476	1	2.07555	ARRB2
positive regulation of catalytic activity (GO:0043085)	0.38476	1	2.07555	PSENEN
carboxylic acid metabolic process (GO:0019752)	0.38476	1	2.07555	CYP4F3
positive regulation of biomineral tissue development (GO:0070169)	0.38476	1	2.07555	ISG15
negative regulation of multi-organism process (GO:0043901)	0.38476	1	2.07555	CARD16
positive regulation of locomotion (GO:0040017)	0.38476	1	2.07555	CCL19
regulation of intracellular protein transport (GO:0033157)	0.38476	1	2.07555	LCP1
regulation of neurotransmitter receptor activity (GO:0099601)	0.38476	1	2.07555	PTK2B
regulation of interleukin-12 production (GO:0032655)	0.38476	1	2.07555	CCL19
positive regulation of cellular metabolic process (GO:0031325)	0.389553	1	1.48898	PRELID1;ARRB2
epithelial tube morphogenesis (GO:0060562)	0.393757	1	2.0145	PODXL
negative regulation of DNA binding (GO:0043392)	0.393757	1	2.0145	JUN
response to peptide (GO:1901652)	0.393757	1	2.0145	CACNA1A
regulation of axon extension (GO:0030516)	0.393757	1	2.0145	PLXNA2
endoplasmic reticulum organization (GO:0007029)	0.393757	1	2.0145	GAK
anterior/posterior pattern specification (GO:0009952)	0.393757	1	2.0145	BASP1
regulation of interferon-beta production (GO:0032648)	0.393757	1	2.0145	DDX58
macromolecule catabolic process (GO:0009057)	0.393757	1	2.0145	TPP1
cellular transition metal ion homeostasis (GO:0046916)	0.39471	1	1.47297	ATP7B;HAMP
cotranslational protein targeting to membrane (GO:0006613)	0.39471	1	1.47297	RPL3;RPSA
regulation of cell proliferation (GO:0042127)	0.396678	1	1.1107	FGR;HCK;CXCL10;IFITM1;JUN;JUND;EIF2AK2;PTK2B;IFIT3;S100A11;BAP1;TNFSF13B
lipid phosphorylation (GO:0046834)	0.402623	1	1.95695	PI4K2B
regulation of heart rate by cardiac conduction (GO:0086091)	0.402623	1	1.95695	KCNJ2
negative regulation of cell-substrate adhesion (GO:0010812)	0.402623	1	1.95695	TBCD
negative regulation of protein kinase B signaling (GO:0051898)	0.402623	1	1.95695	ARRB2
regulation of microtubule polymerization (GO:0031113)	0.402623	1	1.95695	TBCD
negative regulation of protein complex assembly (GO:0031333)	0.402623	1	1.95695	TFIP11
endothelial cell migration (GO:0043542)	0.402623	1	1.95695	S100P
apical junction assembly (GO:0043297)	0.402623	1	1.95695	TBCD
maturation of SSU-rRNA from tricistronic rRNA transcript (SSU-rRNA, 5.8S rRNA, LSU-rRNA) (GO:0000462)	0.402623	1	1.95695	RPSA
regulation of sodium ion transport (GO:0002028)	0.402623	1	1.95695	PER1
regulation of mitochondrial membrane potential (GO:0051881)	0.402623	1	1.95695	PRELID1
regulation of ion transmembrane transport (GO:0034765)	0.402623	1	1.95695	KCNJ2
positive regulation of ATPase activity (GO:0032781)	0.402623	1	1.95695	PFN1
membrane protein proteolysis (GO:0033619)	0.402623	1	1.95695	PSENEN
regulation of phosphoprotein phosphatase activity (GO:0043666)	0.402623	1	1.95695	CRY2
negative regulation of tumor necrosis factor production (GO:0032720)	0.402623	1	1.95695	LGALS9
neural crest cell development (GO:0014032)	0.402623	1	1.95695	SEMA3F
positive regulation of osteoblast differentiation (GO:0045669)	0.402623	1	1.95695	IFITM1
protein kinase B signaling (GO:0043491)	0.402623	1	1.95695	TNF
mitotic cell cycle phase transition (GO:0044772)	0.404026	1	1.2397	MCM7;NES;RAB8A;TUBA4A
interleukin-1-mediated signaling pathway (GO:0070498)	0.404964	1	1.44196	EGR1;IL1RN
regulation of cell death (GO:0010941)	0.41006	1	1.42694	JUN;JUND
ciliary basal body-plasma membrane docking (GO:0097711)	0.41006	1	1.42694	RAB8A;TUBA4A
regulation of potassium ion transport (GO:0043266)	0.41136	1	1.90259	PTK2B
organic hydroxy compound transport (GO:0015850)	0.41136	1	1.90259	CEACAM1
regulation of nitric-oxide synthase activity (GO:0050999)	0.41136	1	1.90259	GCH1
lymphocyte proliferation (GO:0046651)	0.41136	1	1.90259	TNFSF14
endoderm formation (GO:0001706)	0.41136	1	1.90259	MMP8
calcium ion transmembrane import into cytosol (GO:0097553)	0.41136	1	1.90259	CCL19
heart looping (GO:0001947)	0.41136	1	1.90259	DNAAF1
plasma membrane organization (GO:0007009)	0.41136	1	1.90259	BIN2
endosome organization (GO:0007032)	0.41136	1	1.90259	PI4K2B
epithelial cell migration (GO:0010631)	0.41136	1	1.90259	S100P
Wnt signaling pathway, calcium modulating pathway (GO:0007223)	0.41136	1	1.90259	GNG2
inner mitochondrial membrane organization (GO:0007007)	0.41136	1	1.90259	ATP5J2
glutamate receptor signaling pathway (GO:0007215)	0.41136	1	1.90259	PTK2B
protein localization to membrane (GO:0072657)	0.414477	1	1.28425	GAK;TNF;RAB8A
cell morphogenesis involved in neuron differentiation (GO:0048667)	0.415135	1	1.41223	TBCD;RAB8A
positive regulation of neuron projection development (GO:0010976)	0.415135	1	1.41223	PLXNA2;PTK2B
protein targeting to ER (GO:0045047)	0.415135	1	1.41223	RPL3;RPSA
cellular response to organonitrogen compound (GO:0071417)	0.415135	1	1.41223	EGR1;ACTB
negative regulation of gene expression (GO:0010629)	0.415621	1	1.1083	CCR1;PER1;JUN;SPI1;BASP1;BCL3;CRY2;EIF2AK2;LGALS9;TNF
transcription, DNA-templated (GO:0006351)	0.419204	1	1.15438	TCERG1;EGR1;XAB2;BCL3;ARRB2;IRF9
protein monoubiquitination (GO:0006513)	0.41997	1	1.85117	TRIM21
positive regulation of mitochondrial outer membrane permeabilization involved in apoptotic signaling pathway (GO:1901030)	0.41997	1	1.85117	PPP1R13B
positive regulation of axonogenesis (GO:0050772)	0.41997	1	1.85117	PLXNA2
regulation of metal ion transport (GO:0010959)	0.41997	1	1.85117	PER1
histone modification (GO:0016570)	0.420187	1	1.39782	MIER1;PADI2
steroid metabolic process (GO:0008202)	0.425218	1	1.3837	CYP1A1;CYP19A1
glycosaminoglycan biosynthetic process (GO:0006024)	0.425218	1	1.3837	NDST1;HS3ST3A1
neuron projection morphogenesis (GO:0048812)	0.426129	1	1.26061	RAC2;RHOH;RAB8A
regulation of protein kinase B signaling (GO:0051896)	0.426129	1	1.26061	CHI3L1;ARRB2;CCL19
T cell receptor signaling pathway (GO:0050852)	0.426129	1	1.26061	HLA-DRB5;WAS;LCP2
potassium ion import (GO:0010107)	0.428454	1	1.80245	KCNJ2
mitochondrion disassembly (GO:0061726)	0.428454	1	1.80245	ATG4B
DNA damage checkpoint (GO:0000077)	0.428454	1	1.80245	TAOK3
regulation of cellular pH (GO:0030641)	0.428454	1	1.80245	SLC26A8
retina homeostasis (GO:0001895)	0.428454	1	1.80245	ACTB
protein processing (GO:0016485)	0.43521	1	1.3563	PSENEN;SRGN
regulation of proteasomal protein catabolic process (GO:0061136)	0.436814	1	1.75623	LAMP3
clathrin-dependent endocytosis (GO:0072583)	0.436814	1	1.75623	GAK
purine ribonucleoside monophosphate biosynthetic process (GO:0009168)	0.436814	1	1.75623	ATP5J2
ERBB2 signaling pathway (GO:0038128)	0.436814	1	1.75623	CDC37
mitotic DNA damage checkpoint (GO:0044773)	0.436814	1	1.75623	TAOK3
cellular response to amino acid starvation (GO:0034198)	0.436814	1	1.75623	EIF2AK2
negative regulation of cell proliferation (GO:0008285)	0.437328	1	1.13212	IFITM1;EIF2AK2;PTK2B;IFIT3;S100A11;BAP1
neuron projection development (GO:0031175)	0.441538	1	1.23042	BLOC1S1;RAC2;RHOH
negative regulation of transcription from RNA polymerase II promoter (GO:0000122)	0.442882	1	1.09104	TCERG1;PER1;JUN;JUND;TCF25;CRY2;MXD1;HAMP;TNF
negative regulation of transport (GO:0051051)	0.445053	1	1.71233	HAMP
embryonic heart tube morphogenesis (GO:0003143)	0.445053	1	1.71233	DNAAF1
negative regulation of epidermal growth factor receptor signaling pathway (GO:0042059)	0.445053	1	1.71233	ARHGEF7
autophagy of mitochondrion (GO:0000422)	0.445053	1	1.71233	ATG4B
ameboidal-type cell migration (GO:0001667)	0.445053	1	1.71233	SEMA3F
positive regulation of Ras protein signal transduction (GO:0046579)	0.445053	1	1.71233	GPR65
detection of chemical stimulus involved in sensory perception of bitter taste (GO:0001580)	0.445053	1	1.71233	RTP4
negative regulation of catabolic process (GO:0009895)	0.445053	1	1.71233	TNF
regulation of ATPase activity (GO:0043462)	0.445053	1	1.71233	PFN1
determination of heart left/right asymmetry (GO:0061371)	0.445053	1	1.71233	DNAAF1
positive regulation of angiogenesis (GO:0045766)	0.445108	1	1.32996	SPHK1;CHI3L1
protein import into nucleus (GO:0006606)	0.445108	1	1.32996	BCL3;TNF
negative regulation of cell projection organization (GO:0031345)	0.453171	1	1.67056	GAK
regulation of substrate adhesion-dependent cell spreading (GO:1900024)	0.453171	1	1.67056	ARHGEF7
positive regulation of viral transcription (GO:0050434)	0.453171	1	1.67056	JUN
negative regulation of STAT cascade (GO:1904893)	0.453171	1	1.67056	BCL3
regulation of cellular metabolic process (GO:0031323)	0.453171	1	1.67056	MPV17
sensory perception of bitter taste (GO:0050913)	0.453171	1	1.67056	RTP4
regulation of protein localization (GO:0032880)	0.453171	1	1.67056	PLEKHM2
regulation of protein modification process (GO:0031399)	0.461172	1	1.63079	PPP1R14B
determination of left/right symmetry (GO:0007368)	0.461172	1	1.63079	DNAAF1
negative regulation of protein secretion (GO:0050709)	0.461172	1	1.63079	SRGN
ceramide metabolic process (GO:0006672)	0.461172	1	1.63079	CERS6
cellular response to retinoic acid (GO:0071300)	0.461172	1	1.63079	PTK2B
nuclear-transcribed mRNA catabolic process (GO:0000956)	0.468106	1	1.18092	RPL3;RPSA;PATL1
regulation of B cell proliferation (GO:0030888)	0.469055	1	1.59286	TNFSF13B
negative regulation of ERBB signaling pathway (GO:1901185)	0.469055	1	1.59286	ARHGEF7
negative regulation of protein metabolic process (GO:0051248)	0.469055	1	1.59286	LILRB2
membrane depolarization (GO:0051899)	0.469055	1	1.59286	CACNA1A
RNA catabolic process (GO:0006401)	0.469055	1	1.59286	RNASE2
protein transmembrane import into intracellular organelle (GO:0044743)	0.469055	1	1.59286	TIMM23
negative regulation of DNA metabolic process (GO:0051053)	0.469055	1	1.59286	S100A11
nucleobase-containing compound catabolic process (GO:0034655)	0.469055	1	1.59286	RNASE2
negative regulation of hydrolase activity (GO:0051346)	0.469423	1	1.26839	CSTA;IFIT1
negative regulation of nucleic acid-templated transcription (GO:1903507)	0.472093	1	1.07985	PER1;JUN;SPI1;BASP1;BCL3;CRY2;TNF
ribosomal small subunit biogenesis (GO:0042274)	0.476823	1	1.55666	RPSA
sprouting angiogenesis (GO:0002040)	0.476823	1	1.55666	PTK2B
adherens junction organization (GO:0034332)	0.476823	1	1.55666	TBCD
detection of chemical stimulus involved in sensory perception of taste (GO:0050912)	0.476823	1	1.55666	RTP4
amide biosynthetic process (GO:0043604)	0.476823	1	1.55666	CERS6
negative regulation of immune system process (GO:0002683)	0.476823	1	1.55666	LILRB2
positive regulation of intracellular transport (GO:0032388)	0.476823	1	1.55666	FGR
regulation of smooth muscle cell proliferation (GO:0048660)	0.476823	1	1.55666	TNF
regulation of intracellular pH (GO:0051453)	0.476823	1	1.55666	SLC26A8
carboxylic acid biosynthetic process (GO:0046394)	0.476823	1	1.55666	PYCR2
inorganic anion transport (GO:0015698)	0.476823	1	1.55666	SLC26A8
regulation of steroid biosynthetic process (GO:0050810)	0.476823	1	1.55666	EGR1
negative regulation of immune response (GO:0050777)	0.476823	1	1.55666	SAMSN1
myeloid cell differentiation (GO:0030099)	0.476823	1	1.55666	EVI2B
viral gene expression (GO:0019080)	0.47897	1	1.24533	RPL3;RPSA
macroautophagy (GO:0016236)	0.47897	1	1.24533	ATG4B;PRKAB1
cellular response to insulin stimulus (GO:0032869)	0.47897	1	1.24533	CEACAM1;RAB8A
regulation of angiogenesis (GO:0045765)	0.479321	1	1.1609	CEACAM1;SPHK1;CHI3L1
hexose metabolic process (GO:0019318)	0.484479	1	1.52207	OAS1
regulation of synaptic transmission, glutamatergic (GO:0051966)	0.484479	1	1.52207	PTK2B
nuclear-transcribed mRNA catabolic process, nonsense-mediated decay (GO:0000184)	0.488412	1	1.22309	RPL3;RPSA
phosphatidylinositol metabolic process (GO:0046488)	0.488412	1	1.22309	PI4K2B;PLEK
cartilage development (GO:0051216)	0.492022	1	1.48898	CHI3L1
regulation of fibroblast proliferation (GO:0048145)	0.492022	1	1.48898	SPHK1
viral transcription (GO:0019083)	0.493093	1	1.21227	RPL3;RPSA
peptide cross-linking (GO:0018149)	0.499456	1	1.4573	CSTA
polyol metabolic process (GO:0019751)	0.499456	1	1.4573	ITPKB
regulation of organelle assembly (GO:1902115)	0.499456	1	1.4573	HCK
negative regulation of JAK-STAT cascade (GO:0046426)	0.499456	1	1.4573	BCL3
histone H4 acetylation (GO:0043967)	0.499456	1	1.4573	PER1
heterophilic cell-cell adhesion via plasma membrane cell adhesion molecules (GO:0007157)	0.499456	1	1.4573	DCHS1
inositol phosphate metabolic process (GO:0043647)	0.499456	1	1.4573	ITPKB
epithelium development (GO:0060429)	0.502373	1	1.19119	DMBT1;TPP1
endosome to lysosome transport (GO:0008333)	0.506781	1	1.42694	TRAK1
regulation of cell cycle arrest (GO:0071156)	0.506781	1	1.42694	EVI2B
cellular macromolecule catabolic process (GO:0044265)	0.506781	1	1.42694	RNASE2
protein autoubiquitination (GO:0051865)	0.513999	1	1.39782	TRIM21
cilium movement (GO:0003341)	0.513999	1	1.39782	DNAAF1
establishment of protein localization to mitochondrion (GO:0072655)	0.513999	1	1.39782	TIMM23
gonad development (GO:0008406)	0.513999	1	1.39782	BASP1
plasma membrane bounded cell projection organization (GO:0120036)	0.516086	1	1.1609	BLOC1S1;PLEK
protein deubiquitination (GO:0016579)	0.518823	1	1.06604	DDX58;ARRB2;ACTB;BAP1
regulation of neuron projection development (GO:0010975)	0.520602	1	1.15115	GAK;PTK2B
brain development (GO:0007420)	0.520602	1	1.15115	HESX1;NES
regulation of ion transport (GO:0043269)	0.521112	1	1.36986	KCNJ2
myeloid leukocyte differentiation (GO:0002573)	0.521112	1	1.36986	CCL19
macromolecular complex assembly (GO:0065003)	0.525089	1	1.14155	WAS;PTK2B
protein modification by small protein conjugation (GO:0032446)	0.525791	1	1.03256	HERC5;FBXW5;ISG15;ARRB2;TRIM21;HIST1H2BC
negative regulation of transcription, DNA-templated (GO:0045892)	0.526242	1	1.01097	TCERG1;PER1;JUN;SPI1;JUND;TCF25;BASP1;BCL3;CRY2;MXD1;HAMP;TNF
cellular response to DNA damage stimulus (GO:0006974)	0.526634	1	1.04093	MOAP1;TAOK3;MCM7;BCL2A1;BCL3
negative regulation of neuron projection development (GO:0010977)	0.528121	1	1.343	GAK
arachidonic acid metabolic process (GO:0019369)	0.528121	1	1.343	CYP1A1
negative regulation of cell migration (GO:0030336)	0.529548	1	1.13212	IFITM1;ARAP3
protein modification by small protein removal (GO:0070646)	0.530973	1	1.0497	DDX58;ARRB2;ACTB;BAP1
protein phosphorylation (GO:0006468)	0.532035	1	1.02011	FGR;HCK;CCL11;TAOK3;EIF2AK2;PTK2B;PRKAB1
positive regulation of proteolysis (GO:0045862)	0.535029	1	1.31718	TNF
regulation of cell-matrix adhesion (GO:0001952)	0.535029	1	1.31718	PTK2B
positive regulation of mitotic cell cycle (GO:0045931)	0.535029	1	1.31718	SPHK1
positive regulation of phosphatidylinositol 3-kinase signaling (GO:0014068)	0.541835	1	1.29232	FGR
regulation of calcium ion-dependent exocytosis (GO:0017158)	0.541835	1	1.29232	SYN1
monocarboxylic acid transport (GO:0015718)	0.541835	1	1.29232	CEACAM1
positive regulation of protein import into nucleus (GO:0042307)	0.541835	1	1.29232	DDX58
negative regulation of multicellular organismal process (GO:0051241)	0.547098	1	1.09589	CEACAM1;TNF
cell morphogenesis involved in differentiation (GO:0000904)	0.548542	1	1.26839	TBCD
protein targeting to mitochondrion (GO:0006626)	0.548542	1	1.26839	TIMM23
RNA modification (GO:0009451)	0.548542	1	1.26839	NOP10
positive regulation of response to stimulus (GO:0048584)	0.548542	1	1.26839	DDX58
glycosphingolipid metabolic process (GO:0006687)	0.548542	1	1.26839	ARSE
regulation of axonogenesis (GO:0050770)	0.555151	1	1.24533	PLXNA2
fat cell differentiation (GO:0045444)	0.555151	1	1.24533	FFAR2
Notch signaling pathway (GO:0007219)	0.555151	1	1.24533	PSENEN
vesicle organization (GO:0016050)	0.5557	1	1.07863	SRGN;PI4K2B
positive regulation of protein kinase B signaling (GO:0051897)	0.5557	1	1.07863	CHI3L1;CCL19
positive regulation of protein phosphorylation (GO:0001934)	0.559637	1	0.997473	SPHK1;CHI3L1;PTK2B;LCP2;CCL19;TNF
anion transport (GO:0006820)	0.561664	1	1.22309	SLC26A8
organonitrogen compound catabolic process (GO:1901565)	0.561664	1	1.22309	TPP1
positive regulation of protein transport (GO:0051222)	0.561664	1	1.22309	TNF
cellular iron ion homeostasis (GO:0006879)	0.561664	1	1.22309	HAMP
autophagosome organization (GO:1905037)	0.561664	1	1.22309	ATG4B
ATP metabolic process (GO:0046034)	0.561664	1	1.22309	ATP5J2
IRE1-mediated unfolded protein response (GO:0036498)	0.568081	1	1.20163	TPP1
chloride transmembrane transport (GO:1902476)	0.568081	1	1.20163	SLC26A8
epidermal growth factor receptor signaling pathway (GO:0007173)	0.568081	1	1.20163	PTK2B
cellular respiration (GO:0045333)	0.568081	1	1.20163	BLOC1S1
response to retinoic acid (GO:0032526)	0.568081	1	1.20163	PTK2B
intracellular protein transport (GO:0006886)	0.574008	1	0.986933	CDC37;BCL3;TRAK1;TNF;RAB8A
phospholipid transport (GO:0015914)	0.574405	1	1.18092	PRELID1
autophagosome assembly (GO:0000045)	0.574405	1	1.18092	ATG4B
regulation of protein metabolic process (GO:0051246)	0.580637	1	1.1609	LILRB2
sterol metabolic process (GO:0016125)	0.580637	1	1.1609	CYP19A1
keratinocyte differentiation (GO:0030216)	0.580637	1	1.1609	CSTA
positive regulation of transcription from RNA polymerase II promoter (GO:0045944)	0.58561	1	0.969243	RXRB;EGR1;PER1;CXCL10;JUN;SPI1;JUND;DDX58;TFEC;FOS;TNF;IER2
positive regulation of cell proliferation (GO:0008284)	0.587729	1	0.969243	HCK;SPHK1;PTK2B;TNF;NES;TNFSF13B
potassium ion transport (GO:0006813)	0.592829	1	1.12284	KCNJ2
regulation of DNA replication (GO:0006275)	0.592829	1	1.12284	S100A11
protein polyubiquitination (GO:0000209)	0.594931	1	0.968101	HERC5;FBXW5;RNF19B;TRIM21
positive regulation of catabolic process (GO:0009896)	0.598792	1	1.10473	TNF
regulation of actin filament-based process (GO:0032970)	0.598792	1	1.10473	RND1
negative regulation of intrinsic apoptotic signaling pathway (GO:2001243)	0.598792	1	1.10473	BCL2A1
stress-activated MAPK cascade (GO:0051403)	0.598792	1	1.10473	LGALS9
post-translational protein modification (GO:0043687)	0.599235	1	0.959288	SERPINA1;FBXW5;ARSE;RAB8A;F5
regulation of signal transduction by p53 class mediator (GO:1901796)	0.600926	1	0.992654	PPP1R13B;PRKAB1
regulation of vesicle-mediated transport (GO:0060627)	0.600926	1	0.992654	CPLX2;RAB8A
iron ion homeostasis (GO:0055072)	0.604668	1	1.08719	HAMP
regulation of proteolysis (GO:0030162)	0.604668	1	1.08719	CSTA
negative regulation of neuron apoptotic process (GO:0043524)	0.604668	1	1.08719	PTK2B
positive regulation of cell projection organization (GO:0031346)	0.604668	1	1.08719	PTK2B
negative regulation of sequence-specific DNA binding transcription factor activity (GO:0043433)	0.608768	1	0.978474	ARRB2;TRIM21
regulation of cellular component organization (GO:0051128)	0.608768	1	0.978474	CEACAM1;BAP1
protein ubiquitination (GO:0016567)	0.610213	1	0.947534	HERC5;FBXW5;RNF19B;ISG15;ARRB2;TRIM21;HIST1H2BC
inorganic anion transmembrane transport (GO:0098661)	0.610458	1	1.07021	SLC26A8
homophilic cell adhesion via plasma membrane adhesion molecules (GO:0007156)	0.610458	1	1.07021	CEACAM1
positive regulation of JAK-STAT cascade (GO:0046427)	0.610458	1	1.07021	PTK2B
glycerophospholipid metabolic process (GO:0006650)	0.610458	1	1.07021	PLEK
glucose metabolic process (GO:0006006)	0.610458	1	1.07021	OAS1
cellular response to decreased oxygen levels (GO:0036294)	0.610458	1	1.07021	CARD16
negative regulation of neuron differentiation (GO:0045665)	0.610458	1	1.07021	GAK
ion transport (GO:0006811)	0.611456	1	0.948002	ATP7B;SLC26A8;PIEZO1;PLP2
glycolipid metabolic process (GO:0006664)	0.616163	1	1.05374	ARSE
regulation of JAK-STAT cascade (GO:0046425)	0.616163	1	1.05374	BCL3
regulation of cell division (GO:0051302)	0.616163	1	1.05374	EVI2B
positive regulation of macromolecule biosynthetic process (GO:0010557)	0.616492	1	0.964692	BCL3;CCL19
central nervous system development (GO:0007417)	0.616572	1	0.94691	HESX1;TPP1;NES
protein oligomerization (GO:0051259)	0.616572	1	0.94691	FCER1G;GCH1;TRIM21
intracellular steroid hormone receptor signaling pathway (GO:0030518)	0.621786	1	1.03778	PADI2
negative regulation of epithelial cell proliferation (GO:0050680)	0.621786	1	1.03778	CEACAM1
JNK cascade (GO:0007254)	0.621786	1	1.03778	CCL19
positive regulation of cellular protein localization (GO:1903829)	0.621786	1	1.03778	TNF
cellular macromolecule biosynthetic process (GO:0034645)	0.623607	1	0.933149	XAB2;RPL3;MCM7;BCL3;RPSA
cellular protein complex assembly (GO:0043623)	0.624099	1	0.951294	DNAAF1;TBCD
neuron development (GO:0048666)	0.624099	1	0.951294	BLOC1S1;TBCD
viral process (GO:0016032)	0.625831	1	0.933998	HCK;RPL3;RPSA
epidermal cell differentiation (GO:0009913)	0.627326	1	1.02229	CSTA
positive regulation of synaptic transmission (GO:0050806)	0.627326	1	1.02229	PTK2B
positive regulation of endothelial cell proliferation (GO:0001938)	0.627326	1	1.02229	CCL11
positive regulation of autophagy (GO:0010508)	0.627326	1	1.02229	TRIM21
cellular response to UV (GO:0034644)	0.627326	1	1.02229	CARD16
skeletal system development (GO:0001501)	0.631589	1	0.938262	CHI3L1;ARSE
regulation of epithelial to mesenchymal transition (GO:0010717)	0.632785	1	1.00725	PHLDB1
negative regulation of phosphatase activity (GO:0010923)	0.632785	1	1.00725	CRY2
regulation of osteoblast differentiation (GO:0045667)	0.638165	1	0.992654	IFITM1
positive regulation of endothelial cell migration (GO:0010595)	0.643466	1	0.978474	PTK2B
stress-activated protein kinase signaling cascade (GO:0031098)	0.643466	1	0.978474	TAOK3
positive regulation of proteasomal ubiquitin-dependent protein catabolic process (GO:0032436)	0.643466	1	0.978474	RNF19B
protein ubiquitination involved in ubiquitin-dependent protein catabolic process (GO:0042787)	0.643466	1	0.978474	RNF19B
Rab protein signal transduction (GO:0032482)	0.643466	1	0.978474	RAB8A
neuropeptide signaling pathway (GO:0007218)	0.643466	1	0.978474	GPR84
negative regulation of developmental process (GO:0051093)	0.643466	1	0.978474	CEACAM1
calcium-mediated signaling (GO:0019722)	0.643466	1	0.978474	SPHK1
ribosome biogenesis (GO:0042254)	0.643888	1	0.909201	RPL3;WDR74;RPSA
organelle assembly (GO:0070925)	0.644773	1	0.910813	BIN2;DNAAF1;ATG4B;RAB8A;PATL1
negative regulation of cell differentiation (GO:0045596)	0.64622	1	0.913242	PTK2B;TNF
regulation of cell communication (GO:0010646)	0.648689	1	0.964692	SAMSN1
defense response to Gram-negative bacterium (GO:0050829)	0.648689	1	0.964692	DMBT1
regulation of cation channel activity (GO:2001257)	0.648689	1	0.964692	PTK2B
protein stabilization (GO:0050821)	0.653362	1	0.901226	CDC37;PFN1
lipid biosynthetic process (GO:0008610)	0.653837	1	0.951294	CYP19A1
SCF-dependent proteasomal ubiquitin-dependent protein catabolic process (GO:0031146)	0.653837	1	0.951294	FBXW5
regulation of fat cell differentiation (GO:0045598)	0.653837	1	0.951294	TNF
negative regulation of cell cycle (GO:0045786)	0.653837	1	0.951294	PPP1R13B
regulation of gene expression (GO:0010468)	0.656902	1	0.924691	CCR1;EGR1;SP110;DDX58;SP140;RHOH;SERPINB9;PRKAB1;TNF;PER1;ZC3H7A;LAMP3;STAP1;LGALS9
transcription-coupled nucleotide-excision repair (GO:0006283)	0.658909	1	0.938262	XAB2
lymphocyte differentiation (GO:0030098)	0.658909	1	0.938262	RHOH
chloride transport (GO:0006821)	0.658909	1	0.938262	SLC26A8
positive regulation of proteasomal protein catabolic process (GO:1901800)	0.658909	1	0.938262	RNF19B
regulation of G-protein coupled receptor protein signaling pathway (GO:0008277)	0.663907	1	0.925583	PLEK
negative regulation of phosphorylation (GO:0042326)	0.668832	1	0.913242	STAP1
negative regulation of cellular amide metabolic process (GO:0034249)	0.668832	1	0.913242	EIF2AK2
C-terminal protein lipidation (GO:0006501)	0.668832	1	0.913242	ATG4B
antigen processing and presentation of exogenous peptide antigen via MHC class I, TAP-dependent (GO:0002479)	0.668832	1	0.913242	CYBB
gland development (GO:0048732)	0.668832	1	0.913242	HESX1
purine ribonucleotide biosynthetic process (GO:0009152)	0.668832	1	0.913242	ATP5J2
cAMP-mediated signaling (GO:0019933)	0.668832	1	0.913242	GPR65
hemopoiesis (GO:0030097)	0.673686	1	0.901226	PLEK
axon guidance (GO:0007411)	0.6741	1	0.867002	PLXNA2;SEMA3F
water-soluble vitamin metabolic process (GO:0006767)	0.678468	1	0.889521	TCN1
positive regulation of translation (GO:0045727)	0.68318	1	0.878117	BCL3
plasma membrane bounded cell projection assembly (GO:0120031)	0.686309	1	0.852612	DNAAF1;ARHGEF7;RAB8A
cation transport (GO:0006812)	0.687824	1	0.867002	PIEZO1
steroid biosynthetic process (GO:0006694)	0.687824	1	0.867002	CYP19A1
regulation of endothelial cell proliferation (GO:0001936)	0.687824	1	0.867002	CCL11
cell-cell junction assembly (GO:0007043)	0.687824	1	0.867002	TBCD
positive regulation of protein modification process (GO:0031401)	0.690605	1	0.840407	LILRB2;TNF
NIK/NF-kappaB signaling (GO:0038061)	0.6924	1	0.856164	CHI3L1
regulation of hydrolase activity (GO:0051336)	0.6924	1	0.856164	PLXNA2
epidermis development (GO:0008544)	0.696909	1	0.845594	WAS
negative regulation of cell cycle process (GO:0010948)	0.696909	1	0.845594	EVI2B
positive regulation of protein catabolic process (GO:0045732)	0.696909	1	0.845594	TNF
regulation of mitotic cell cycle (GO:0007346)	0.697012	1	0.83022	TAOK3;SPHK1
DNA damage response, signal transduction by p53 class mediator (GO:0030330)	0.701352	1	0.835282	BCL3
C-terminal protein amino acid modification (GO:0018410)	0.701352	1	0.835282	ATG4B
negative regulation of neuron death (GO:1901215)	0.70573	1	0.825219	PTK2B
positive regulation of peptidyl-serine phosphorylation (GO:0033138)	0.70573	1	0.825219	TNF
positive regulation of homeostatic process (GO:0032846)	0.70573	1	0.825219	LGALS9
activation of GTPase activity (GO:0090630)	0.710044	1	0.815395	GPR65
regulation of cell cycle G2/M phase transition (GO:1902749)	0.710044	1	0.815395	TUBA4A
transcription from RNA polymerase II promoter (GO:0006366)	0.714606	1	0.847338	RXRB;TCERG1;EGR1;SPI1;ARRB2;IRF9
vesicle-mediated transport (GO:0016192)	0.717787	1	0.835282	RAC2;WAS;RHOH;ARAP3;TRAK1
calcium ion transmembrane transport (GO:0070588)	0.718485	1	0.796432	CACNA1A
regulation of peptidyl-serine phosphorylation (GO:0033135)	0.718485	1	0.796432	TNF
gene expression (GO:0010467)	0.719764	1	0.83325	XAB2;RPL3;BCL3;RPSA;TFIP11
peptide biosynthetic process (GO:0043043)	0.724499	1	0.787278	RPL3;RPSA
regulation of proteasomal ubiquitin-dependent protein catabolic process (GO:0032434)	0.72668	1	0.778331	RNF19B
negative regulation of translation (GO:0017148)	0.72668	1	0.778331	EIF2AK2
antigen receptor-mediated signaling pathway (GO:0050851)	0.727285	1	0.799531	HLA-DRB5;WAS;LCP2
regulation of neuron apoptotic process (GO:0043523)	0.730688	1	0.769586	PTK2B
cell-matrix adhesion (GO:0007160)	0.734638	1	0.761035	ARHGEF7
negative regulation of protein phosphorylation (GO:0001933)	0.736025	1	0.769586	CEACAM1;SAMSN1
positive regulation of cellular protein metabolic process (GO:0032270)	0.738529	1	0.752672	BCL3
regulation of protein catabolic process (GO:0042176)	0.738529	1	0.752672	TNF
negative regulation of kinase activity (GO:0033673)	0.738529	1	0.752672	CEACAM1
ER to Golgi vesicle-mediated transport (GO:0006888)	0.741633	1	0.761035	SERPINA1;F5
cell cycle G1/S phase transition (GO:0044843)	0.742364	1	0.744491	MCM7
positive regulation of nucleic acid-templated transcription (GO:1903508)	0.744742	1	0.818643	EGR1;JUN;SPI1;BCL3;FOS;TNF
proteolysis involved in cellular protein catabolic process (GO:0051603)	0.746143	1	0.736485	ISG15
skin development (GO:0043588)	0.749867	1	0.728651	CSTA
axon development (GO:0061564)	0.749867	1	0.728651	RAB8A
regulation of transcription from RNA polymerase II promoter (GO:0006357)	0.750953	1	0.880494	TCERG1;EGR1;JUN;SPI1;JUND;TCF25;DDX58;FOS;TRAK1;TNF;RXRB;PER1;CXCL10;TFEC;CRY2;MXD1;HAMP;NFKBID;IER2
positive regulation of protein localization to membrane (GO:1905477)	0.753536	1	0.720981	PPP1R13B
regulation of B cell activation (GO:0050864)	0.753536	1	0.720981	SAMSN1
positive regulation of protein metabolic process (GO:0051247)	0.757151	1	0.71347	TNF
protein localization to nucleus (GO:0034504)	0.757151	1	0.71347	BCL3
Golgi vesicle transport (GO:0048193)	0.759607	1	0.758227	SERPINA1;RAB8A;F5
protein localization to organelle (GO:0033365)	0.760714	1	0.706115	GAK
positive regulation of transcription, DNA-templated (GO:0045893)	0.762395	1	0.856164	EGR1;JUN;SPI1;JUND;DDX58;FOS;TNF;RXRB;PER1;CXCL10;TFEC;BCL3;PADI2;IER2
phosphatidylinositol biosynthetic process (GO:0006661)	0.764225	1	0.69891	PI4K2B
response to UV (GO:0009411)	0.764225	1	0.69891	BCL3
positive regulation of neuron differentiation (GO:0045666)	0.764225	1	0.69891	PTK2B
RNA metabolic process (GO:0016070)	0.770687	1	0.717206	TFIP11;RNASE2
regulation of lipid metabolic process (GO:0019216)	0.771093	1	0.684932	CYP1A1
cilium organization (GO:0044782)	0.773183	1	0.71347	DNAAF1;RAB8A
metal ion transport (GO:0030001)	0.774451	1	0.67815	KCNJ2
regulation of kinase activity (GO:0043549)	0.774451	1	0.67815	FGR
RNA processing (GO:0006396)	0.775655	1	0.709774	USB1;TFIP11
plasma membrane invagination (GO:0099024)	0.781022	1	0.664982	BIN2
monovalent inorganic cation transport (GO:0015672)	0.784236	1	0.658588	KCNJ2
peptide metabolic process (GO:0006518)	0.784236	1	0.658588	TPP1
positive regulation of lymphocyte activation (GO:0051251)	0.784236	1	0.658588	SIRPB1
G1/S transition of mitotic cell cycle (GO:0000082)	0.787403	1	0.652316	MCM7
fatty acid metabolic process (GO:0006631)	0.790523	1	0.646162	ALOX5AP
RNA splicing (GO:0008380)	0.790523	1	0.646162	USB1
rRNA metabolic process (GO:0016072)	0.792307	1	0.684932	RPL3;RPSA
cellular response to starvation (GO:0009267)	0.793598	1	0.640123	EIF2AK2
positive regulation of epithelial cell proliferation (GO:0050679)	0.793598	1	0.640123	CCL11
negative regulation of response to external stimulus (GO:0032102)	0.793598	1	0.640123	CARD16
cilium assembly (GO:0060271)	0.794627	1	0.71347	DNAAF1;RAB8A;TUBA4A
nucleotide-excision repair (GO:0006289)	0.796627	1	0.634196	XAB2
rRNA processing (GO:0006364)	0.796861	1	0.67815	RPL3;RPSA
nervous system development (GO:0007399)	0.797132	1	0.752672	TAOK3;DCHS1;TPP1;TRAK1;NES
circulatory system development (GO:0072359)	0.799613	1	0.628378	TCF25
negative regulation of protein kinase activity (GO:0006469)	0.799613	1	0.628378	CEACAM1
positive regulation of phosphorylation (GO:0042327)	0.809998	1	0.658588	KCTD20;TNF
regulation of organelle organization (GO:0033043)	0.811123	1	0.606134	S100A8
peptidyl-lysine modification (GO:0018205)	0.816629	1	0.595593	BLOC1S1
protein O-linked glycosylation (GO:0006493)	0.816629	1	0.595593	TRAK1
regulation of macroautophagy (GO:0016241)	0.819322	1	0.590458	PRKAB1
positive regulation of peptidyl-tyrosine phosphorylation (GO:0050731)	0.819322	1	0.590458	PTK2B
regulation of translation (GO:0006417)	0.820363	1	0.643128	BCL3;EIF2AK2
cytosolic transport (GO:0016482)	0.82459	1	0.58045	GAK
positive regulation of B cell activation (GO:0050871)	0.827166	1	0.575573	TNFSF13B
RNA export from nucleus (GO:0006405)	0.827166	1	0.575573	RPSA
DNA replication (GO:0006260)	0.829704	1	0.570776	MCM7
sulfur compound biosynthetic process (GO:0044272)	0.83467	1	0.561419	NDST1
complement activation, classical pathway (GO:0006958)	0.837099	1	0.556855	C1QC
dephosphorylation (GO:0016311)	0.839492	1	0.552364	DAPP1
axonogenesis (GO:0007409)	0.839587	1	0.614288	SEMA3F;RAB8A
protein dephosphorylation (GO:0006470)	0.84185	1	0.547945	DAPP1
humoral immune response mediated by circulating immunoglobulin (GO:0002455)	0.84185	1	0.547945	C1QC
protein lipidation (GO:0006497)	0.846463	1	0.539316	ATG4B
ncRNA processing (GO:0034470)	0.846743	1	0.603464	RPL3;RPSA
endosomal transport (GO:0016197)	0.850211	1	0.598193	BLOC1S1;TRAK1
extracellular matrix organization (GO:0030198)	0.850211	1	0.598193	LCP1;MMP8
generation of neurons (GO:0048699)	0.853132	1	0.52687	IER2
protein glycosylation (GO:0006486)	0.853132	1	0.52687	TRAK1
translation (GO:0006412)	0.85528	1	0.590458	RPL3;RPSA
cellular response to hypoxia (GO:0071456)	0.857417	1	0.518888	CARD16
RNA splicing, via transesterification reactions with bulged adenosine as nucleophile (GO:0000377)	0.861796	1	0.58045	XAB2;TFIP11
proteasomal protein catabolic process (GO:0010498)	0.863382	1	0.578001	FBXW5;ARRB2
phagocytosis (GO:0006909)	0.863612	1	0.507357	BIN2
muscle contraction (GO:0006936)	0.867592	1	0.49995	SMTN
anterograde trans-synaptic signaling (GO:0098916)	0.868042	1	0.570776	CACNA1A;SYN1
regulation of primary metabolic process (GO:0080090)	0.871457	1	0.492756	CYP1A1
neuron differentiation (GO:0030182)	0.871457	1	0.492756	IER2
modification-dependent protein catabolic process (GO:0019941)	0.875209	1	0.485767	ISG15
ubiquitin-dependent protein catabolic process (GO:0006511)	0.877554	1	0.602579	FBXW5;RNF19B;ARRB2
regulation of G2/M transition of mitotic cell cycle (GO:0010389)	0.889156	1	0.459686	TUBA4A
heart development (GO:0007507)	0.889156	1	0.459686	TCF25
mRNA splicing, via spliceosome (GO:0000398)	0.896789	1	0.524852	XAB2;TFIP11
regulation of protein phosphorylation (GO:0001932)	0.896789	1	0.524852	FGR;TNF
transcription initiation from RNA polymerase II promoter (GO:0006367)	0.905832	1	0.428082	RXRB
glycerophospholipid biosynthetic process (GO:0046474)	0.911255	1	0.417641	PI4K2B
mRNA processing (GO:0006397)	0.920588	1	0.484051	XAB2;TFIP11
negative regulation of signal transduction (GO:0009968)	0.920588	1	0.484051	PLEK;CARD16
chemical synaptic transmission (GO:0007268)	0.926124	1	0.474001	CACNA1A;SYN1
proteasome-mediated ubiquitin-dependent protein catabolic process (GO:0043161)	0.927887	1	0.470743	FBXW5;ARRB2
phosphate-containing compound metabolic process (GO:0006796)	0.933055	1	0.37428	ITPKB
regulation of mitotic cell cycle phase transition (GO:1901990)	0.934041	1	0.372245	TUBA4A
DNA-templated transcription, initiation (GO:0006352)	0.935971	1	0.368243	RXRB
regulation of MAPK cascade (GO:0043408)	0.950258	1	0.337405	CEACAM1
positive regulation of signal transduction (GO:0009967)	0.952427	1	0.332491	PTK2B
cellular protein localization (GO:0034613)	0.953572	1	0.418918	RTP4;RAB8A
ion transmembrane transport (GO:0034220)	0.960787	1	0.312754	ATP7B
regulation of signal transduction (GO:0009966)	0.968159	1	0.293962	SAMSN1
transmembrane transport (GO:0055085)	0.975505	1	0.362398	ATP7B;UCP2
regulation of transcription, DNA-templated (GO:0006355)	0.978255	1	0.642927	EGR1;JUN;SPI1;JUND;SP110;SP140;RHOH;FOS;TRAK1;TNF;PER1;BASP1;BCL3;CRY2;NFKBID
DNA metabolic process (GO:0006259)	0.990484	1	0.218131	MCM7
protein transport (GO:0015031)	0.992046	1	0.210102	RAB8A
regulation of nucleic acid-templated transcription (GO:1903506)	0.993865	1	0.338516	SP110;SP140;RHOH
regulation of cellular macromolecule biosynthetic process (GO:2000112)	0.995421	1	0.325641	SP110;SP140;RHOH

## Sheet: GO Cellular Component
Term	P-value	Adjusted P-value	Odds Ratio	Genes
tertiary granule (GO:0070820)	1.91606e-08	8.54562e-06	6.26462	CD53;FCER1G;CR1;CRISP3;FPR1;CYBB;GPR84;LILRB2;MMP8;CEACAM1;CLEC4D;DOK3;TCN1;OLR1;CYSTM1
tertiary granule membrane (GO:0070821)	1.14185e-06	0.000254633	8.44436	CD53;CEACAM1;FCER1G;CLEC4D;OLR1;CYBB;CYSTM1;GPR84;LILRB2
specific granule (GO:0042581)	4.22199e-06	0.000627669	5.13699	CD53;CEACAM3;CEACAM1;CLEC4D;TCN1;CRISP3;C3AR1;CYBB;OLR1;CHI3L1;GPR84;MMP8
secretory granule lumen (GO:0034774)	4.60831e-06	0.000513826	3.67313	SRGN;SERPINA1;CRISP3;RNASE2;MMP8;F5;PLAC8;FGR;ACTR1B;BIN2;TCN1;PADI2;S100A12;CHI3L1;S100P;S100A11;S100A8
specific granule membrane (GO:0035579)	5.58539e-05	0.00498217	6.02138	CD53;CEACAM3;CEACAM1;CLEC4D;C3AR1;OLR1;CYBB;GPR84
cytoskeleton (GO:0005856)	0.000247862	0.0184244	2.50263	DDX58;IFIT5;WAS;RHOH;ACTB;SYN1;TUBA4A;RND1;FGR;RASSF1;SMTN;MARCKS;ACTR1B;BASP1;RAC2;S100A12;LCP1;NES;S100A8
ficolin-1-rich granule membrane (GO:0101003)	0.000260381	0.01659	6.73703	FCER1G;CR1;CLEC4D;DOK3;FPR1;LILRB2
ficolin-1-rich granule (GO:0101002)	0.000387475	0.0216017	3.72245	CLEC4D;DOK3;SERPINA1;ACTR1B;FCER1G;CR1;BIN2;FGL2;FPR1;LILRB2
integral component of plasma membrane (GO:0005887)	0.000388547	0.0192547	1.77904	LMBR1L;IGSF6;CSF3R;CD82;GPR65;FPR1;CSF2RB;GPR84;IL2RG;TNF;SIRPB1;ATP7B;PODXL;TNFSF10;C3AR1;PLXNA2;OLR1;FFAR2;CD37;KCNJ2;CCR1;CD53;PSENEN;P2RY13;FCER1G;CR1;KCNH7;CYBB;LILRB2;LILRB3;CLEC4A;CEACAM1;TYROBP;SELL;SLC26A8;CDHR5;EVI2B;SLC25A4
cytoplasmic vesicle lumen (GO:0060205)	0.00289302	0.129029	3.71668	FGR;ACTR1B;BIN2;S100A12;S100P;S100A8;S100A11
IPAF inflammasome complex (GO:0072557)	0.00306532	0.124285	22.8311	CASP5;CASP4
actin cytoskeleton (GO:0015629)	0.00412288	0.153234	2.56267	FGR;HCK;SMTN;MARCKS;DDX58;IFIT5;RAC2;WAS;LCP1;ACTB;RND1
AIM2 inflammasome complex (GO:0097169)	0.00425016	0.145813	19.5695	CASP5;CASP4
microvillus membrane (GO:0031528)	0.00561243	0.178796	17.1233	PODXL;CDHR5
post-mRNA release spliceosomal complex (GO:0071014)	0.00714673	0.212496	15.2207	XAB2;TFIP11
ruffle membrane (GO:0032587)	0.00743583	0.207274	5.16929	FGR;DDX58;PLEK;IFIT5
actin filament (GO:0005884)	0.00846678	0.222129	4.98132	HCK;RAC2;WAS;LCP1
NLRP3 inflammasome complex (GO:0072559)	0.00884777	0.219228	13.6986	CASP5;CASP4
specific granule lumen (GO:0035580)	0.0127966	0.300383	4.41891	TCN1;CRISP3;CHI3L1;MMP8
phagocytic vesicle membrane (GO:0030670)	0.0178295	0.397598	5.40735	DMBT1;RAC2;CYBB
phagocytic vesicle (GO:0045335)	0.0333183	0.707618	3.30087	DMBT1;RAC2;CYBB;RAB8A
polymeric cytoskeletal fiber (GO:0099513)	0.0440434	0.89288	2.16947	HCK;RAC2;WAS;TBCD;LCP1;NES;TUBA4A
tertiary granule lumen (GO:1904724)	0.0463412	0.898616	3.73599	TCN1;CRISP3;MMP8
integral component of mitochondrial membrane (GO:0032592)	0.0484539	0.900436	3.66928	TIMM23;SLC25A44;SLC25A4
mitochondrial intermembrane space (GO:0005758)	0.0506132	0.90294	3.6049	PRELID1;BLOC1S1;TIMM23
Golgi-associated vesicle (GO:0005798)	0.0528186	0.906042	3.54275	SERPINA1;RAB8A;F5
platelet alpha granule lumen (GO:0031093)	0.0746649	1	3.06686	SRGN;SERPINA1;F5
azurophil granule (GO:0042582)	0.0756212	1	2.2238	PLAC8;C3AR1;FPR1;PADI2;RNASE2
focal adhesion (GO:0005925)	0.0784204	1	1.73157	HCK;MARCKS;RPL3;RAC2;PTK2B;LCP1;PFN1;ARHGEF7;ACTB
mitochondrial envelope (GO:0005740)	0.0799857	1	2.97796	PRELID1;BLOC1S1;TIMM23
spanning component of plasma membrane (GO:0044214)	0.084474	1	11.4155	CDHR5
gamma-secretase complex (GO:0070765)	0.084474	1	11.4155	PSENEN
cytoplasmic vesicle (GO:0031410)	0.0959541	1	1.91144	ATP7B;GCH1;ARRDC2;ARRB2;TRAK1;RND1
COPII-coated ER to Golgi transport vesicle (GO:0030134)	0.0968889	1	2.73973	HLA-DRB5;SERPINA1;F5
endocytic patch (GO:0061645)	0.0978447	1	9.78474	WAS
actin cortical patch (GO:0030479)	0.0978447	1	9.78474	WAS
perinuclear region of cytoplasm (GO:0048471)	0.103648	1	1.63079	ATP7B;OAS2;LAMP3;MX1;S100A13;EIF2AK2;PTK2B;LCP1;TNFSF13B
ficolin-1-rich granule lumen (GO:1904813)	0.106007	1	2.22742	SERPINA1;ACTR1B;BIN2;FGL2
apical dendrite (GO:0097440)	0.111021	1	8.56164	PTK2B
ribonucleoprotein granule (GO:0035770)	0.111981	1	2.56849	EDC4;ACTB;PATL1
NMDA selective glutamate receptor complex (GO:0017146)	0.124005	1	7.61035	PTK2B
microvillus (GO:0005902)	0.125168	1	3.26158	PODXL;CDHR5
trans-Golgi network membrane (GO:0032588)	0.127903	1	2.41741	HLA-DRB5;ATP7B;RAB8A
chromatin (GO:0000785)	0.143784	1	1.61977	JUN;SPI1;JUND;MCM7;PADI2;MXD1;ACTB
platelet alpha granule (GO:0031091)	0.144575	1	2.28311	SRGN;SERPINA1;F5
azurophil granule lumen (GO:0035578)	0.144575	1	2.28311	PLAC8;PADI2;RNASE2
IkappaB kinase complex (GO:0008385)	0.149409	1	6.22665	IFIT5
spanning component of membrane (GO:0089717)	0.149409	1	6.22665	CDHR5
beta-catenin-TCF complex (GO:1990907)	0.149409	1	6.22665	TLE4
endoplasmic reticulum-Golgi intermediate compartment membrane (GO:0033116)	0.150078	1	2.9146	SERPINA1;F5
small nucleolar ribonucleoprotein complex (GO:0005732)	0.161835	1	5.70776	NOP10
RNA polymerase II transcription factor complex (GO:0090575)	0.168335	1	1.86376	TLE4;JUN;JUND;FOS
mitochondrial inner membrane presequence translocase complex (GO:0005744)	0.174079	1	5.2687	TIMM23
MHC class II protein complex (GO:0042613)	0.186146	1	4.89237	HLA-DRB5
SCF ubiquitin ligase complex (GO:0019005)	0.186365	1	2.53678	FBXW5;TRIM21
trans-Golgi network transport vesicle (GO:0030140)	0.198036	1	4.56621	RAB8A
intrinsic component of the cytoplasmic side of the plasma membrane (GO:0031235)	0.198036	1	4.56621	RASA3
azurophil granule membrane (GO:0035577)	0.207612	1	2.36183	C3AR1;FPR1
vacuolar lumen (GO:0005775)	0.209465	1	1.70169	PLAC8;PADI2;TPP1;RNASE2
T cell receptor complex (GO:0042101)	0.209754	1	4.28082	CEACAM1
90S preribosome (GO:0030686)	0.209754	1	4.28082	RPSA
BLOC-1 complex (GO:0031083)	0.209754	1	4.28082	BLOC1S1
U2-type spliceosomal complex (GO:0005684)	0.21833	1	2.28311	XAB2;TFIP11
filopodium (GO:0030175)	0.21833	1	2.28311	PODXL;LCP1
MHC protein complex (GO:0042611)	0.232679	1	3.80518	HLA-DRB5
nuclear euchromatin (GO:0005719)	0.232679	1	3.80518	JUN
mitochondrion (GO:0005739)	0.243538	1	1.20163	MOAP1;PRELID1;SP140;IFI6;TIMM23;PYCR2;TRAK1;IFIT3;TMEM71;ATP5J2;BLOC1S1;UCP2;CASP4;STAP1;MPV17;MXD1;XAF1;SLC25A4
P-body (GO:0000932)	0.261551	1	2.0145	EDC4;PATL1
euchromatin (GO:0000791)	0.26583	1	3.26158	JUN
integral component of mitochondrial outer membrane (GO:0031307)	0.26583	1	3.26158	SLC25A44
actin-based cell projection (GO:0098858)	0.272391	1	1.95695	PODXL;LCP1
telomerase holoenzyme complex (GO:0005697)	0.276561	1	3.11333	NOP10
transcriptionally active chromatin (GO:0035327)	0.276561	1	3.11333	PADI2
intrinsic component of mitochondrial outer membrane (GO:0031306)	0.276561	1	3.11333	SLC25A44
mitochondrial proton-transporting ATP synthase complex (GO:0005753)	0.276561	1	3.11333	ATP5J2
intermediate filament cytoskeleton (GO:0045111)	0.277809	1	1.92938	NES;S100A8
coated vesicle (GO:0030135)	0.277809	1	1.92938	SERPINA1;F5
bicellular tight junction (GO:0005923)	0.283224	1	1.90259	DDX58;TBCD
trans-Golgi network (GO:0005802)	0.285311	1	1.48093	PI4K2B;HLA-DRB5;ATP7B;RAB8A
prespliceosome (GO:0071010)	0.287134	1	2.97796	XAB2
preribosome (GO:0030684)	0.299445	1	1.82648	WDR74;RPSA
serine/threonine protein kinase complex (GO:1902554)	0.307822	1	2.73973	IFIT5
nuclear chromatin (GO:0000790)	0.310742	1	1.35362	JUN;SPI1;JUND;MXD1;ACTB
preribosome, large subunit precursor (GO:0030687)	0.317941	1	2.63435	WDR74
brush border membrane (GO:0031526)	0.337737	1	2.44618	CDHR5
integral component of lumenal side of endoplasmic reticulum membrane (GO:0071556)	0.34742	1	2.36183	HLA-DRB5
U2-type catalytic step 2 spliceosome (GO:0071007)	0.34742	1	2.36183	XAB2
intrinsic component of mitochondrial inner membrane (GO:0031304)	0.34742	1	2.36183	TIMM23
nuclear chromosome part (GO:0044454)	0.348532	1	1.22309	JUN;SPI1;JUND;MCM7;TFIP11;MXD1;ACTB
mitochondrial inner membrane (GO:0005743)	0.380193	1	1.20516	UCP2;TIMM23;MPV17;SLC25A44;SLC25A4;ATP5J2
dendrite (GO:0030425)	0.384251	1	1.27429	ARHGEF15;PTK2B;TRAK1;STRN4
integral component of mitochondrial inner membrane (GO:0031305)	0.38476	1	2.07555	TIMM23
clathrin-coated endocytic vesicle membrane (GO:0030669)	0.38476	1	2.07555	HLA-DRB5
endoplasmic reticulum-Golgi intermediate compartment (GO:0005793)	0.404964	1	1.44196	SERPINA1;F5
early endosome (GO:0005769)	0.407311	1	1.23411	SAMD9L;SAMD9;LAMP3;TRAK1
cytosolic part (GO:0044445)	0.410576	1	1.29232	RPL3;IFIT5;RPSA
Cul4-RING E3 ubiquitin ligase complex (GO:0080008)	0.41136	1	1.90259	FBXW5
lysosome (GO:0005764)	0.420006	1	1.13614	SRGN;PI4K2B;HCK;HLA-DRB5;BLOC1S1;RNF19B;TPP1
lysosomal membrane (GO:0005765)	0.420295	1	1.17686	PI4K2B;HLA-DRB5;BLOC1S1;C3AR1;FPR1
nuclear speck (GO:0016607)	0.434631	1	1.15698	BASP1;DNAAF1;CRY2;TFIP11;SREK1
ionotropic glutamate receptor complex (GO:0008328)	0.436814	1	1.75623	PTK2B
contractile actin filament bundle (GO:0097517)	0.445053	1	1.71233	LCP1
stress fiber (GO:0001725)	0.445053	1	1.71233	LCP1
cytoplasmic ribonucleoprotein granule (GO:0036464)	0.452989	1	1.2087	EDC4;ACTB;PATL1
aggresome (GO:0016235)	0.453171	1	1.67056	FGR
nuclear chromosome, telomeric region (GO:0000784)	0.464611	1	1.28025	MCM7;TFIP11
endocytic vesicle (GO:0030139)	0.469423	1	1.26839	ARRB2;RAB8A
intermediate filament (GO:0005882)	0.492022	1	1.48898	NES
spliceosomal complex (GO:0005681)	0.497746	1	1.20163	XAB2;TFIP11
recycling endosome membrane (GO:0055038)	0.499456	1	1.4573	RAB8A
mitochondrial outer membrane (GO:0005741)	0.502373	1	1.19119	MOAP1;BCL2A1
actomyosin (GO:0042641)	0.506781	1	1.42694	LCP1
late endosome membrane (GO:0031902)	0.506781	1	1.42694	HLA-DRB5
cytosolic small ribosomal subunit (GO:0022627)	0.513999	1	1.39782	RPSA
recycling endosome (GO:0055037)	0.520602	1	1.15115	TNF;RAB8A
clathrin-coated endocytic vesicle (GO:0045334)	0.521112	1	1.36986	HLA-DRB5
cortical actin cytoskeleton (GO:0030864)	0.535029	1	1.31718	WAS
nuclear chromosome (GO:0000228)	0.535029	1	1.31718	JUN
small ribosomal subunit (GO:0015935)	0.541835	1	1.29232	RPSA
chromosome, telomeric region (GO:0000781)	0.542753	1	1.10473	MCM7;TFIP11
cytosolic ribosome (GO:0022626)	0.542753	1	1.10473	RPL3;RPSA
ER to Golgi transport vesicle membrane (GO:0012507)	0.548542	1	1.26839	HLA-DRB5
endoplasmic reticulum lumen (GO:0005788)	0.557748	1	1.01471	SERPINA1;IL27;ARSE;F5
caveola (GO:0005901)	0.561664	1	1.22309	HCK
late endosome (GO:0005770)	0.608768	1	0.978474	HLA-DRB5;ATP7B
cation channel complex (GO:0034703)	0.616163	1	1.05374	PTK2B
cytosolic large ribosomal subunit (GO:0022625)	0.638165	1	0.992654	RPL3
large ribosomal subunit (GO:0015934)	0.653837	1	0.951294	RPL3
lytic vacuole membrane (GO:0098852)	0.664169	1	0.881886	PI4K2B;HLA-DRB5;BLOC1S1
microtubule cytoskeleton (GO:0015630)	0.671817	1	0.882644	RASSF1;ACTR1B;PODXL;TBCD;TUBA4A
ribosome (GO:0005840)	0.673686	1	0.901226	EIF2AK2
nuclear body (GO:0016604)	0.684199	1	0.886643	BASP1;DNAAF1;CRY2;SH3BGRL3;TFIP11;S100P;SREK1;NOP10
clathrin-coated vesicle membrane (GO:0030665)	0.696909	1	0.845594	HLA-DRB5
Golgi subcompartment (GO:0098791)	0.70341	1	0.857952	PI4K2B;NDST1;HLA-DRB5;HS3ST3A1;ATP7B;RAB8A
lysosomal lumen (GO:0043202)	0.718485	1	0.796432	TPP1
peroxisome (GO:0005777)	0.742364	1	0.744491	MPV17
microbody (GO:0042579)	0.742364	1	0.744491	MPV17
cullin-RING ubiquitin ligase complex (GO:0031461)	0.744399	1	0.75683	FBXW5;TRIM21
lytic vacuole (GO:0000323)	0.749854	1	0.748559	HCK;TPP1
chromosome (GO:0005694)	0.760714	1	0.706115	JUN
clathrin-coated vesicle (GO:0030136)	0.771093	1	0.684932	RAB8A
Golgi membrane (GO:0000139)	0.776206	1	0.774809	NDST1;HLA-DRB5;HS3ST3A1;ATP7B;RAB8A
microtubule (GO:0005874)	0.814206	1	0.652316	TBCD;TUBA4A
membrane raft (GO:0045121)	0.827166	1	0.575573	TNF
integral component of endoplasmic reticulum membrane (GO:0030176)	0.848719	1	0.535103	HLA-DRB5
fibrillar center (GO:0001650)	0.85529	1	0.522848	SP140
nucleolus (GO:0005730)	0.867668	1	0.709249	RPL3;PODXL;WDR74;S100A13;FAM32A;TFIP11;OASL
nucleolar part (GO:0044452)	0.895536	1	0.447668	SP140
nucleoplasm part (GO:0044451)	0.938575	1	0.504864	SH3BGRL3;S100P;NOP10
microtubule organizing center (GO:0005815)	0.940537	1	0.54038	ACTR1B;PODXL;TBCD;RAB8A
mitochondrial matrix (GO:0005759)	0.941352	1	0.444761	BLOC1S1;PYCR2
centrosome (GO:0005813)	0.966106	1	0.445725	ACTR1B;TBCD;RAB8A
